# Supplementary material for: Is sulfidation a true detoxification process for silver nanoparticles?: from the perspective of chronic exposure
Source: Royal Society of Chemistry journal article supplement (doi:10.1039/c9en00989b), 2019-01-01
Supplement: c9en00989b2.xlsx [file c9en00989b2.xlsx]

## Sheet: Es-AgNP +s-AgNPs1
Electronic supplementary information - Part Ⅱ
Summary of the total numbers of differentially expressed genes in Es-AgNP + s-AgNPs1 compared to E. coli.
Gene_id	Gene name	Gene description	readcount_Es-AgNP + s-AgNPs1	readcount_E. coli	log2FoldChange	p-value	padj
K427_00085	yieP	GntR family transcriptional regulator	63.2103	142.698	-1.1747	2.9532e-07	8.8274e-07
K427_00095	rbsR	transcriptional regulator	46.6448	15.8406	1.5581	2.2038e-05	5.4829e-05
K427_00100	rbsK	ribokinase	132.088	64.2865	1.0389	7.9085e-08	2.4718e-07
K427_00155	mnmG	tRNA uridine 5-carboxymethylaminomethyl modification protein	58.851	26.533	1.1493	0.00011522	0.00026294
K427_00175	atpE	ATP F0F1 synthase subunit C	315.18	84.3513	1.9017	4.2741e-36	3.3226e-35
K427_00180	atpF	ATP F0F1 synthase subunit B	530.966	210.152	1.3372	4.6697e-38	3.7681e-37
K427_00185	atpH	ATP F0F1 synthase subunit delta	205.76	101.38	1.0212	3.6483e-11	1.4365e-10
K427_00190	atpA	ATP F0F1 synthase subunit alpha	2534.51	919.152	1.4633	8.9228e-198	3.0058e-196
K427_00195	atpG	ATP F0F1 synthase subunit gamma	890.611	380.571	1.2266	1.0969e-55	1.13e-54
K427_00200	atpD	ATP synthase F0F1 subunit beta	3133.92	1142.51	1.4558	1.9547e-242	8.2968e-241
K427_00340	tnaB	tryptophan permease	1009.62	9.90039	6.6721	7.8219e-242	3.2549e-240
K427_00345	tnaA	cysteine desulfhydrase	7890.39	51.878	7.2488	0	0
K427_00360	yidC	membrane protein insertase	142.114	60.5904	1.2299	3.1749e-10	1.1883e-09
K427_00405	gyrB	DNA gyrase subunit B	722.341	1481.76	-1.0366	3.1899e-49	3.0632e-48
K427_00415	yidB	hypothetical protein	47.9526	162.894	-1.7643	1.8216e-14	8.3497e-14
K427_00490	ibpA	heat shock protein IbpA	29.6434	84.0873	-1.5042	1.1852e-06	3.314e-06
K427_00545	yidF	hypothetical protein	41.4136	109.432	-1.4019	1.698e-07	5.2151e-07
K427_00565	ilvB	acetolactate synthase catalytic subunit	1029.67	3015.79	-1.5503	1.2606e-195	4.0536e-194
K427_00745	kbaY	hypothetical protein	64.0822	22.7049	1.4969	1.2902e-06	3.5934e-06
K427_00945	hldD	ADP-L-glycero-D-manno-heptose-6-epimerase	433.317	1332.46	-1.6206	1.0869e-93	1.6244e-92
K427_00955	kbl	2-amino-3-ketobutyrate CoA ligase	1041.44	484.327	1.1045	5.1461e-56	5.4066e-55
K427_00960	tdh	L-threonine 3-dehydrogenase	1028.37	427.433	1.2666	6.5268e-67	7.8257e-66
K427_01030	lldP	L-lactate permease	62.3384	179.791	-1.5281	6.2317e-13	2.6293e-12
K427_01145	gadB	glutamate decarboxylase	478.219	1112.41	-1.2179	1.8766e-49	1.8185e-48
K427_01245	rihA	ribonucleoside hydrolase	197.914	65.2106	1.6017	5.4468e-19	2.919e-18
K427_01325	ybeD	hypothetical protein	40.1058	141.642	-1.8204	2.575e-13	1.1085e-12
K427_01375	cspE	cold-shock protein	7535.97	19193.7	-1.3488	0	0
K427_01380	pagP	phospholipid:lipid A palmitoyltransferase	5.2312	24.817	-2.2461	0.00038723	0.00082593
K427_01425	citF	citrate lyase subunit alpha	18.3092	0	5.1158	6.4579e-06	1.6796e-05
K427_01535	entH	thioesterase	4.35933	20.3288	-2.2213	0.0014311	0.0027966
K427_01540	entA	2%2C3-dihydroxybenzoate-2%2C3-dehydrogenase	2.17967	70.6228	-5.018	2.0683e-17	1.0603e-16
K427_01550	entE	enterobactin synthase subunit E	4.79526	90.0275	-4.2307	2.7761e-20	1.5464e-19
K427_01555	entC	isochorismate synthase	3.9234	22.9689	-2.5495	0.00021782	0.00048102
K427_01570	fepD	iron-enterobactin transporter membrane protein	5.66713	37.8855	-2.741	7.3103e-07	2.0965e-06
K427_01575	fepG	iron-enterobactin transporter permease	0	23.3649	-5.7441	7.7368e-07	2.2099e-06
K427_01580	fepC	iron-enterobactin transporter ATP-binding protein	1.74373	22.5729	-3.6943	1.0255e-05	2.6159e-05
K427_01595	entF	enterobactin synthase subunit F	17.4373	938.953	-5.7508	1.7775e-215	6.3938e-214
K427_01670	ybdK	gamma-glutamyl ligase	243.687	802.592	-1.7196	1.7229e-62	1.9553e-61
K427_01775	--	methyltransferase	106.368	41.0536	1.3735	4.0974e-09	1.4349e-08
K427_01880	sucC	succinyl-CoA synthetase subunit beta	5889.02	2564.47	1.1994	0	0
K427_01885	sucD	succinyl-CoA synthetase subunit alpha	5028.05	2279.99	1.141	2.7488e-276	1.389e-274
K427_01915	cydA	cytochrome d terminal oxidase subunit 1	8246.55	3336.96	1.3053	0	0
K427_01920	cydB	cytochrome d ubiquinol oxidase subunit 2	8138.43	2658.85	1.6139	0	0
K427_01930	ybgE	hypothetical protein	476.039	205.136	1.2145	3.7e-30	2.6087e-29
K427_02025	dsdX	DsdX permease	227.993	100.852	1.1768	1.1629e-14	5.3421e-14
K427_02030	dsdA	D-serine dehydratase	346.131	143.49	1.2704	9.6927e-24	5.894e-23
K427_02055	yfdE	CoA-transferase	2.6156	17.6887	-2.7576	0.0006841	0.0014164
K427_02105	lpxP	lipid A biosynthesis palmitoleoyl acyltransferase	59.2869	350.078	-2.5619	1.6776e-47	1.5754e-46
K427_02185	yfeO	ion channel protein	20.9248	49.3699	-1.2384	0.0015821	0.003058
K427_02210	mntH	manganese transport protein MntH	204.453	737.381	-1.8506	4.6506e-64	5.4229e-63
K427_02445	ilvE	branched-chain amino acid aminotransferase	129.472	64.5505	1.0041	2.1612e-07	6.5804e-07
K427_02485	hdfR	transcriptional regulator HdfR	57.5432	126.593	-1.1375	2.7189e-06	7.3598e-06
K427_02655	--	TonB-dependent receptor	32.695	2.5081	3.7044	1.9578e-08	6.4717e-08
K427_02670	speF	ornithine decarboxylase	442.036	4.75219	6.5394	1.0837e-107	1.9007e-106
K427_02675	potE	putrescine transporter	518.324	18.2167	4.8305	1.3107e-125	2.6241e-124
K427_02685	seqA	replication initiation regulator SeqA	41.8496	92.5356	-1.1448	5.4879e-05	0.00013025
K427_02725	fur	ferric uptake regulator	481.27	1050.63	-1.1263	6.1605e-41	5.2507e-40
K427_02900	#N/A	#N/A	1038.39	9.50437	6.7715	2.3436e-247	1.0151e-245
K427_03440	ybiJ	hypothetical protein	43.1574	118.277	-1.4545	2.0747e-08	6.8368e-08
K427_03475	mcbA	hypothetical protein	28.3356	112.204	-1.9854	4.0712e-12	1.6584e-11
K427_03490	ybiO	mechanosensitive channel protein	42.2855	145.206	-1.7799	3.2696e-13	1.4018e-12
K427_03520	dps	DNA starvation/stationary phase protection protein Dps	4549.83	16680.6	-1.8743	0	0
K427_03540	ompX	membrane protein	1973.9	8063.14	-2.0303	0	0
K427_03575	ldtB	L%2CD-transpeptidase	109.855	315.888	-1.5238	1.7981e-21	1.0258e-20
K427_03590	ybiV	sugar phosphatase	4.35933	23.8929	-2.4544	0.00022893	0.00050346
K427_03675	yliI	aldose dehydrogenase	42.2855	93.5917	-1.1462	4.8802e-05	0.00011716
K427_03680	gstB	glutathione S-transferase	81.0835	31.0212	1.3862	2.3827e-07	7.2239e-07
K427_03695	ybjG	UDP pyrophosphate phosphatase	33.5668	72.2068	-1.1051	0.00055791	0.0011642
K427_03735	ybjL	transporter	30.9512	79.8631	-1.3675	1.2113e-05	3.0822e-05
K427_03780	potF	spermidine/putrescine ABC transporter substrate-binding protein	54.4916	310.608	-2.511	2.2505e-41	1.9415e-40
K427_03865	poxB	pyruvate dehydrogenase	202.709	518.78	-1.3557	1.7152e-28	1.1704e-27
K427_03875	hcp	hydroxylamine reductase	43.1574	5.67622	2.9266	4.2482e-09	1.4829e-08
K427_03895	aqpZ	porin	31.8231	154.314	-2.2777	4.2385e-19	2.2888e-18
K427_03915	ybjX	hypothetical protein	200.529	563.266	-1.49	9.7362e-36	7.4326e-35
K427_03960	infA	translation initiation factor IF-1	34.4387	75.903	-1.1401	0.00027274	0.0005961
K427_03975	cydC	amino acid ABC transporter permease	145.602	59.6664	1.287	4.8825e-11	1.8978e-10
K427_04035	dmsA	dimethyl sulfoxide reductase	1417.65	302.952	2.2263	7.7959e-188	2.433e-186
K427_04040	dmsB	dimethyl sulfoxide reductase	240.199	96.0998	1.3216	7.7573e-18	4.0549e-17
K427_04045	dmsC	dimethyl sulfoxide reductase	281.613	125.141	1.1702	1.2783e-17	6.6169e-17
K427_04080	focA	formate transporter	185.272	513.104	-1.4696	5.1494e-32	3.7554e-31
K427_04125	cmk	cytidylate kinase	56.6713	154.842	-1.4501	1.5737e-10	5.9746e-10
K427_04135	ihfB	integration host factor subunit beta	285.536	602.34	-1.0769	2.0924e-22	1.2404e-21
K427_04175	ycbJ	hypothetical protein	822.606	328.429	1.3246	2.8947e-57	3.1184e-56
K427_04210	ldtD	murein L%2CD-transpeptidase	407.597	1706.56	-2.0659	2.4733e-170	7.093e-169
K427_04225	aspC	aromatic amino acid aminotransferase	1322.62	602.868	1.1335	2.8117e-73	3.6164e-72
K427_04235	ompF	porin	17065.5	472.183	5.1756	0	0
K427_04340	pqiA	paraquat-inducible membrane protein A	31.3872	112.732	-1.8447	4.3897e-11	1.7125e-10
K427_04360	rmf	ribosome modulation factor	3025.81	10195.4	-1.7525	0	0
K427_04370	ycbZ	Lon protease	71.493	198.008	-1.4697	2.5666e-13	1.1071e-12
K427_04440	hspQ	heat shock protein HspQ	427.214	1370.08	-1.6812	7.6322e-102	1.2754e-100
K427_04465	yccA	membrane protein	366.184	1114.39	-1.6056	1.5253e-77	2.0106e-76
K427_04490	hyaA	hydrogenase	36.6184	16.6327	1.1385	0.0025176	0.0046826
K427_04495	hyaB	hydrogenase	74.1086	26.9291	1.4605	3.0585e-07	9.1291e-07
K427_04660	#N/A	#N/A	236.276	3.96016	5.8988	1.568e-59	1.7332e-58
K427_04710	yhdZ	ABC transporter ATP-binding protein	10.8983	33.9253	-1.6383	0.00095618	0.0019308
K427_04720	yhdX	amino acid ABC transporter permease	8.28273	27.5891	-1.7359	0.0018401	0.0035149
K427_04780	fis	Fis family transcriptional regulator	34.0028	13.0685	1.3796	0.00085375	0.0017405
K427_04840	rbsB	sugar ABC transporter	62.3384	8.31633	2.9061	1.9624e-12	8.15e-12
K427_05150	mtgA	peptidoglycan transglycosylase	81.9554	33.7933	1.2781	9.189e-07	2.6002e-06
K427_05155	yrbL	hypothetical protein	49.6964	104.284	-1.0693	5.7072e-05	0.00013503
K427_05255	murA	UDP-N-acetylglucosamine 1-carboxyvinyltransferase	96.3412	39.8656	1.273	1.1163e-07	3.4686e-07
K427_05315	yhbY	RNA-binding protein YhbY	33.1309	71.5468	-1.1107	0.00055782	0.0011642
K427_05320	rlmE	23S rRNA methyltransferase	317.359	767.082	-1.2733	2.7358e-37	2.1745e-36
K427_05385	rimP	ribosome maturation protein RimP	50.5682	120.257	-1.2498	6.6849e-07	1.9223e-06
K427_05445	mtr	tryptophan permease	102.444	1032.28	-3.3329	1.5195e-179	4.4397e-178
K427_05460	yhbU	protease	29.2075	6.60026	2.1457	4.0233e-05	9.7471e-05
K427_05585	agaV	PTS system N-acetylgalactosamine-specific transporter subunit IIB	20.4889	5.80823	1.8187	0.0018709	0.0035674
K427_05675	tdcA	transcriptional regulator	88.9303	32.8693	1.4359	2.9577e-08	9.642e-08
K427_05680	tdcB	threonine dehydratase	894.099	108.508	3.0426	4.5608e-163	1.2906e-161
K427_05685	tdcC	septum site-determining protein	1282.08	163.422	2.9718	3.6958e-228	1.4525e-226
K427_05690	tdcD	propionate kinase	352.234	36.5654	3.268	2.3884e-69	2.947e-68
K427_05695	tdcE	pyruvate formate-lyase	976.054	45.6738	4.4175	1.7632e-227	6.8033e-226
K427_05700	tdcF	endoribonuclease L-PSP	246.738	16.2366	3.9257	1.2888e-55	1.3214e-54
K427_05705	tdcG	serine dehydratase	313.436	45.5418	2.7829	6.4129e-54	6.5118e-53
K427_05715	yhaO	membrane protein	75.8523	7.39229	3.3591	1.4908e-16	7.5149e-16
K427_05720	yhaM	membrane protein	112.035	21.6489	2.3716	1.7315e-17	8.9192e-17
K427_05740	yhaJ	LysR family transcriptional regulator	27.0278	9.37237	1.528	0.0014331	0.0027979
K427_05755	yqjG	hypothetical protein	91.11	208.04	-1.1912	3.6811e-10	1.373e-09
K427_05780	yqjC	hypothetical protein	266.791	660.026	-1.3068	1.0025e-33	7.4917e-33
K427_05925	ebgA	beta-D-galactosidase	68.8774	15.0486	2.1944	1.6802e-10	6.356e-10
K427_05940	ygjH	methionyl-tRNA synthetase	21.7967	2.6401	3.0454	2.1377e-05	5.3248e-05
K427_05945	patA	putrescine--2-oxoglutarate aminotransferase	390.596	1754.48	-2.1673	8.9117e-187	2.741e-185
K427_06045	ttdR	LysR family transcriptional regulator	17.4373	3.43214	2.345	0.00084777	0.0017316
K427_06070	cca	tRNA nucleotidyl transferase	95.4693	207.908	-1.1228	2.8175e-09	9.9657e-09
K427_06220	cpdA	diguanylate phosphodiesterase	298.614	616.86	-1.0467	8.1138e-22	4.6539e-21
K427_06315	ygiS	ABC transporter substrate-binding protein	30.9512	10.2964	1.5879	0.00046473	0.00098039
K427_06410	dkgA	2%2C5-diketo-D-gluconic acid reductase	268.099	539.769	-1.0096	3.8999e-18	2.0589e-17
K427_06430	yghB	membrane protein	127.292	360.638	-1.5024	8.9927e-24	5.4841e-23
K427_06450	exbB	biopolymer transporter ExbB	61.4666	181.639	-1.5632	1.7695e-13	7.727e-13
K427_06455	exbD	biopolymer transporter ExbD	17.0014	100.456	-2.5628	8.7168e-15	4.048e-14
K427_06460	yghA	oxidoreductase	53.1838	117.749	-1.1467	5.1901e-06	1.3666e-05
K427_06490	hybO	hydrogenase 2 small subunit	344.823	45.1458	2.9332	4.7995e-62	5.4179e-61
K427_06495	hybA	hydrogenase 2 protein HybA	163.039	20.1968	3.013	5.9215e-31	4.2313e-30
K427_06500	hybB	hydrogenase 2 b cytochrome subunit	163.911	30.3612	2.4326	1.6783e-25	1.0696e-24
K427_06505	hybC	hydrogenase 2 large subunit	279.869	51.878	2.4316	2.4709e-42	2.1491e-41
K427_06510	hybD	hydrogenase 2 maturation endopeptidase	47.0808	13.7285	1.778	3.3658e-06	9.0075e-06
K427_06515	hybE	hydrogenase 2-specific chaperone	25.72	7.5243	1.7733	0.00060587	0.0012606
K427_06595	lptG	permease	2.17967	15.5766	-2.8372	0.0012069	0.0023939
K427_06650	glcG	hypothetical protein	398.443	161.706	1.301	5.9868e-28	4.0082e-27
K427_06655	glcB	malate synthase	1851.41	856.714	1.1117	4.3021e-99	6.9695e-98
K427_06665	glcA	glycolate permease glcA	116.394	51.35	1.1806	3.227e-08	1.0456e-07
K427_06805	trmI	tRNA (guanine-N7)-methyltransferase	17.0014	64.8146	-1.9307	2.3909e-07	7.2383e-07
K427_06825	ansB	L-asparaginase II	2674.01	141.906	4.236	0	0
K427_06875	gshB	glutathione synthetase	224.07	489.211	-1.1265	6.1062e-20	3.3659e-19
K427_06880	rsmE	16S rRNA methyltransferase	33.5668	98.8719	-1.5585	5.9337e-08	1.8767e-07
K427_06925	speA	arginine decarboxylase	274.638	582.407	-1.0845	5.6047e-22	3.2499e-21
K427_06935	speB	agmatinase	150.833	67.0586	1.1695	4.0745e-10	1.5144e-09
K427_06950	tktA	transketolase	1450.35	328.429	2.1427	6.4775e-184	1.9638e-182
K427_07150	zapA	Z-ring-associated protein	287.716	1025.02	-1.8329	4.1303e-87	5.9226e-86
K427_07185	gcvT	glycine cleavage system protein T	568.021	34.4534	4.0432	1.0986e-127	2.3085e-126
K427_07190	gcvH	glycine cleavage system protein H	662.618	20.9888	4.9805	2.8123e-161	7.853e-160
K427_07195	gcvP	glycine dehydrogenase	1762.04	49.898	5.1421	0	0
K427_07280	uacT	purine permease	27.4638	4.35617	2.6564	7.7312e-06	2.0034e-05
K427_07315	xdhD	hypoxanthine oxidase	255.893	57.1583	2.1625	2.7606e-34	2.0702e-33
K427_07320	ygfM	oxidoreductase	58.415	7.6563	2.9316	7.9439e-12	3.2112e-11
K427_07325	ssnA	chlorohydrolase	126.421	19.4048	2.7037	3.6351e-22	2.1136e-21
K427_07330	ygfK	selenate reductase subunit YgfK	627.744	52.5381	3.5787	1.1967e-130	2.6182e-129
K427_07340	yqeC	hypothetical protein	105.06	33.6613	1.642	4.2918e-11	1.6836e-10
K427_07355	hyuA	phenylhydantoinase	31.3872	7.6563	2.0355	3.694e-05	9.0006e-05
K427_07360	ygeY	peptidase	142.114	18.3487	2.9533	9.7326e-27	6.3947e-26
K427_07365	ygeX	diaminopropionate ammonia-lyase	99.3927	8.18432	3.6022	3.0524e-22	1.7846e-21
K427_07370	ygeW	ornithine carbamoyltransferase	206.632	10.0324	4.3643	2.1063e-49	2.0319e-48
K427_07385	xdhB	xanthine dehydrogenase	46.6448	19.9328	1.2266	0.00032246	0.0006976
K427_07390	xdhA	xanthine dehydrogenase	163.911	72.8669	1.1696	7.1713e-11	2.7621e-10
K427_07805	ygdI	hypothetical protein	823.042	1818.24	-1.1435	1.9133e-71	2.4314e-70
K427_07840	fucI	sugar isomerase	266.791	107.188	1.3156	1.5985e-19	8.6764e-19
K427_07855	fucA	fuculose phosphate aldolase	64.0822	24.817	1.3686	5.2936e-06	1.3887e-05
K427_07860	fucO	1%2C2-propanediol oxidoreductase	921.998	313.116	1.5581	2.0312e-79	2.7112e-78
K427_07875	sdaC	serine/threonine protein kinase	110.727	54.9142	1.0118	1.4247e-06	3.9419e-06
K427_07920	yqcA	flavodoxin	183.964	398.392	-1.1148	3.0311e-16	1.4994e-15
K427_07990	pyrG	CTP synthetase	599.408	1301.18	-1.1182	1.1777e-49	1.1465e-48
K427_08105	cysI	sulfite reductase subunit beta	25.72	62.7025	-1.2856	0.00023509	0.00051648
K427_08495	srlE	PTS system glucitol/sorbitol-specific transporter subunit IIB	32.259	12.8045	1.3331	0.0015159	0.0029466
K427_08550	csrA	carbon storage regulator	1418.53	5346.34	-1.9142	0	0
K427_08590	#N/A	#N/A	30.9512	121.841	-1.9769	5.8334e-13	2.4661e-12
K427_08605	cbpM	chaperone-modulator protein CbpM	176.553	460.566	-1.3833	2.6539e-26	1.7277e-25
K427_08610	cbpA	DNA-binding protein	589.381	1959.35	-1.7331	1.1598e-151	3.0766e-150
K427_08645	ymdF	hypothetical protein	180.04	4419.14	-4.6174	0	0
K427_08705	putA	transcriptional regulator	905.433	121.709	2.8952	6.0611e-158	1.6491e-156
K427_08730	--	iron permease	6.97493	43.0337	-2.6252	2.6119e-07	7.8737e-07
K427_08735	efeO	ferrous iron transporter	35.3106	82.3712	-1.222	5.4991e-05	0.00013025
K427_08740	efeB	peroxidase	20.9248	103.492	-2.3062	1.6707e-13	7.3153e-13
K427_08755	phoH	hypothetical protein	653.9	1913.94	-1.5494	1.0748e-124	2.1318e-123
K427_08825	csgG	curli production assembly/transport protein CsgG	55.3635	24.949	1.15	0.00018281	0.00040753
K427_09250	ycfH	DNAse	190.067	600.228	-1.659	9.7844e-45	8.9119e-44
K427_09255	ptsG	PTS glucose-specific subunit IIBC	221.018	490.135	-1.149	1.2121e-20	6.8053e-20
K427_09345	ycfT	membrane protein	7.41086	41.8456	-2.4974	8.2811e-07	2.3558e-06
K427_09390	potD	spermidine/putrescine ABC transporter substrate-binding protein	253.277	103.492	1.2912	3.5884e-18	1.8991e-17
K427_09440	purB	adenylosuccinate lyase	101.136	36.5654	1.4678	1.9572e-09	7.0165e-09
K427_09450	mnmA	tRNA 2-thiouridylase	58.851	24.421	1.2689	3.5006e-05	8.549e-05
K427_09470	icd	isocitrate dehydrogenase	3815.29	1696.79	1.169	2.324e-217	8.6529e-216
K427_09780	--	tail protein	13.078	37.8855	-1.5345	0.00091999	0.0018666
K427_09850	znuB	iron ABC transporter permease	9.59053	40.9216	-2.0932	1.3896e-05	3.5108e-05
K427_09855	znuB	membrane protein	10.4624	43.8257	-2.0666	8.2938e-06	2.1387e-05
K427_09860	fhuC	manganese/iron transporter ATP-binding protein	23.5404	87.5194	-1.8945	3.1935e-09	1.124e-08
K427_09865	znuA	iron ABC transporter substrate-binding protein	10.8983	85.1434	-2.9658	9.2025e-15	4.2642e-14
K427_10075	ycgN	hypothetical protein	23.9763	60.7224	-1.3406	0.00017567	0.00039327
K427_10140	ycgB	SpoVR family protein	1166.56	3519.79	-1.5932	4.5473e-238	1.8558e-236
K427_10150	dadX	alanine racemase	272.894	687.351	-1.3327	3.4451e-36	2.6979e-35
K427_10175	ymgE	hypothetical protein	44.9011	139.529	-1.6357	2.2176e-11	8.7642e-11
K427_10315	ychA	hypothetical protein	56.2354	145.866	-1.3751	2.8322e-09	1.0001e-08
K427_10350	chaB	cation transport regulator	23.5404	53.1981	-1.1762	0.0017271	0.00332
K427_10355	chaC	transporter	67.5696	135.437	-1.0032	1.5441e-05	3.8825e-05
K427_10385	narK	nitrate/nitrite transporter NarK	574.124	22.3089	4.6857	1.2323e-137	2.8426e-136
K427_10395	narG	nitrate reductase	2036.24	266.915	2.9315	0	0
K427_10400	narH	nitrate reductase	520.94	146.79	1.8274	9.2514e-56	9.5774e-55
K427_10405	narJ	nitrate reductase	111.599	31.0212	1.847	2.3118e-13	9.9924e-13
K427_10410	narI	nitrate reductase	136.447	44.7498	1.6084	1.2399e-13	5.4705e-13
K427_10440	rssB	response regulator of RpoS	123.805	285.395	-1.2049	1.2149e-13	5.3717e-13
K427_10490	oppA	peptide ABC transporter substrate-binding protein	8128.41	1534.03	2.4056	0	0
K427_10495	oppB	oligopeptide transporter permease	159.551	40.7896	1.9677	7.931e-20	4.338e-19
K427_10500	oppC	peptide ABC transporter permease	350.926	133.589	1.3934	3.9163e-27	2.5812e-26
K427_10505	oppD	oligopeptide transporter ATP-binding component	739.342	258.334	1.517	7.4233e-62	8.3354e-61
K427_10510	oppF	peptide ABC transporter ATP-binding protein	1284.69	470.467	1.4493	7.3084e-100	1.1931e-98
K427_10520	clsA	cardiolipin synthetase	88.9303	179.923	-1.0166	4.5469e-07	1.3291e-06
K427_10530	kch	voltage-gated potassium channel	23.5404	52.4061	-1.1546	0.0022213	0.0041717
K427_10545	tonB	energy transducer TonB	8.71866	28.1171	-1.6893	0.0020729	0.0039104
K427_10570	ompW	membrane protein	1155.22	279.587	2.0468	2.947e-139	6.8728e-138
K427_10585	yciG	hypothetical protein	15.2577	137.549	-3.1723	2.2112e-24	1.3721e-23
K427_10595	trpA	tryptophan synthase subunit alpha	37.4902	98.0799	-1.3874	9.1865e-07	2.6002e-06
K427_10605	trpC	indole-3-glycerol phosphate synthase	23.1045	53.3301	-1.2068	0.0013292	0.0026193
K427_10610	trpD	glutamine amidotransferase	6.97493	69.9628	-3.3263	1.0829e-13	4.7977e-13
K427_10615	trpE	anthranilate synthase component I	13.9499	208.04	-3.8985	1.693e-42	1.4847e-41
K427_10625	yciO	hypothetical protein	114.65	249.094	-1.1194	8.8053e-11	3.3792e-10
K427_10745	osmB	lipoprotein	432.01	1475.55	-1.7721	1.5201e-118	2.8805e-117
K427_10765	gmr	RNase II stability modulator	186.143	575.015	-1.6272	1.0572e-41	9.1578e-41
K427_10790	fabI	enoyl-ACP reductase	3510.57	580.295	2.5968	0	0
K427_10845	sapC	peptide ABC transporter permease	10.4624	46.0698	-2.1386	2.8834e-06	7.7617e-06
K427_10850	sapB	peptide ABC transporter permease	21.3607	76.959	-1.8491	4.9015e-08	1.5595e-07
K427_10855	sapA	peptide ABC transporter substrate-binding protein	65.8259	140.85	-1.0974	1.6689e-06	4.5937e-06
K427_10985	ycjX	hypothetical protein	28.7716	75.903	-1.3995	1.3658e-05	3.4547e-05
K427_11065	fnr	transcriptional regulator	588.946	1435.29	-1.2851	2.5123e-69	3.0819e-68
K427_11180	uspF	universal stress protein F	1884.97	817.772	1.2048	5.8402e-113	1.0685e-111
K427_11205	hslJ	heat-inducible protein	55.3635	178.603	-1.6897	8.2533e-15	3.8411e-14
K427_11570	ynfD	membrane protein	112.907	403.936	-1.839	1.4425e-35	1.0933e-34
K427_11575	ynfE	dimethyl sulfoxide reductase	194.426	50.03	1.9584	1.1053e-23	6.6637e-23
K427_11580	ynfF	dimethyl sulfoxide reductase	162.167	56.6302	1.5178	7.5944e-15	3.5422e-14
K427_11625	ynfM	membrane protein	8.28273	83.5593	-3.3346	4.3087e-16	2.1118e-15
K427_11670	pntB	pyridine nucleotide transhydrogenase	914.152	290.147	1.6556	3.4028e-85	4.8466e-84
K427_11675	pntA	NAD(P) transhydrogenase subunit alpha	818.246	326.185	1.3268	4.2271e-57	4.5308e-56
K427_11735	fumA	fumarate hydratase	1823.94	887.471	1.0393	1.0237e-88	1.4881e-87
K427_11745	ydgA	hypothetical protein	817.81	2304.02	-1.4943	2.4199e-141	5.7704e-140
K427_11770	uidR	TetR family transcriptional regulator	144.73	309.024	-1.0944	1.4717e-12	6.136e-12
K427_11945	sodC	superoxide dismutase	269.843	1273.98	-2.2392	4.1089e-142	9.9091e-141
K427_12005	sodB	superoxide dismutase	3816.59	939.481	2.0223	0	0
K427_12045	cfa	cyclopropane fatty acyl phospholipid synthase	595.049	1672.77	-1.4912	8.9729e-103	1.5113e-101
K427_12085	ydhS	hypothetical protein	157.808	589.931	-1.9024	1.1641e-53	1.1764e-52
K427_12100	ydhX	ferredoxin	31.3872	12.6725	1.3085	0.0020151	0.0038149
K427_12105	ydhW	hypothetical protein	74.5445	24.421	1.61	4.1978e-08	1.3437e-07
K427_12110	ydhV	oxidoreductase	417.188	24.817	4.0713	1.2083e-94	1.8317e-93
K427_12115	ydhY	hypothetical protein	96.7771	3.16812	4.933	5.1847e-25	3.265e-24
K427_12155	ldtE	murein L%2CD-transpeptidase	306.897	651.05	-1.085	2.1245e-24	1.3222e-23
K427_12165	sufE	cysteine desufuration protein SufE	10.8983	37.6215	-1.7875	0.00020019	0.00044394
K427_12170	sufS	cysteine sulfinate desulfinase	89.8022	334.897	-1.8989	3.9558e-31	2.8362e-30
K427_12175	sufD	cysteine desulfurase	115.522	451.326	-1.966	2.1528e-43	1.9196e-42
K427_12180	sufC	cysteine desulfurase	48.8245	192.068	-1.9759	1.5349e-19	8.3522e-19
K427_12185	sufB	cysteine desulfurase	141.678	487.495	-1.7828	1.011e-40	8.5824e-40
K427_12190	sufA	iron-sulfur cluster assembly scaffold protein	66.2618	165.535	-1.3209	9.5535e-10	3.4599e-09
K427_12195	ydiH	hypothetical protein	44.9011	130.817	-1.5427	6.2234e-10	2.2732e-09
K427_12325	ydiU	hypothetical protein	93.7256	228.501	-1.2857	2.1898e-12	9.0413e-12
K427_12465	yniB	membrane protein	57.1072	188.503	-1.7228	5.6983e-16	2.78e-15
K427_12560	astE	succinylglutamate desuccinylase	165.219	864.502	-2.3875	2.9417e-105	5.0757e-104
K427_12565	astB	succinylarginine dihydrolase	108.983	612.372	-2.4903	4.8105e-79	6.3806e-78
K427_12570	astD	succinylglutamate-semialdehyde dehydrogenase	268.971	1302.63	-2.2759	2.3463e-148	5.9278e-147
K427_12575	astA	arginine succinyltransferase	94.5975	248.698	-1.3945	4.1721e-15	1.9589e-14
K427_12640	ynjE	thiosulfate sulfurtransferase	64.5181	21.5168	1.5842	4.5102e-07	1.3202e-06
K427_12665	gdhA	glutamate dehydrogenase	417.624	169.231	1.3032	2.7883e-29	1.9529e-28
K427_12680	ydjA	oxidoreductase	211.863	100.456	1.0766	2.9736e-12	1.2206e-11
K427_12765	yeaD	glucose-6-phosphate 1-epimerase	296.434	70.3588	2.0749	1.1677e-37	9.3869e-37
K427_12785	yeaG	serine/threonine protein kinase	2136.94	6575.44	-1.6215	0	0
K427_12790	yeaH	hypothetical protein	275.074	1064.36	-1.9521	6.8832e-99	1.1067e-97
K427_12915	fadD	long-chain fatty acid--CoA ligase	452.498	969.182	-1.0989	2.6166e-36	2.0567e-35
K427_12925	yeaY	membrane protein	188.759	434.033	-1.2013	7.4763e-20	4.0999e-19
K427_12940	yoaB	endoribonuclease L-PSP	42.2855	14.5206	1.5421	6.0167e-05	0.00014172
K427_12975	sdaA	serine dehydratase	848.762	2062.71	-1.2811	2.5522e-98	4.042e-97
K427_12985	yoaD	c-di-GMP phosphodiesterase	10.0265	45.1458	-2.1708	2.8856e-06	7.7617e-06
K427_13015	manY	PTS mannose transporter subunit IIC	663.054	325.921	1.0246	1.0431e-32	7.66e-32
K427_13045	cspC	cold-shock protein	2324.39	5565.21	-1.2596	6.9191e-255	3.2631e-253
K427_13110	yebS	membrane protein	25.72	67.9827	-1.4023	3.7413e-05	9.1055e-05
K427_13125	yebV	hypothetical protein	119.01	466.902	-1.972	5.0889e-45	4.6551e-44
K427_13130	yebW	hypothetical protein	23.9763	96.8918	-2.0148	7.4515e-11	2.8648e-10
K427_13135	pphA	serine/threonine protein phosphatase	9.15459	44.6178	-2.2851	1.4941e-06	4.1287e-06
K427_13145	yebY	hypothetical protein	61.0306	27.4571	1.1524	8.3405e-05	0.00019408
K427_13155	yobA	hypothetical protein	86.3147	39.7336	1.1192	4.6126e-06	1.219e-05
K427_13255	pykA	pyruvate kinase	1022.7	426.377	1.2622	3.0975e-66	3.6931e-65
K427_13270	znuA	zinc ABC transporter substrate-binding protein	43.1574	119.597	-1.4705	1.287e-08	4.315e-08
K427_13280	znuB	high-affinity zinc transporter membrane component	12.6421	44.0897	-1.8022	5.107e-05	0.00012212
K427_13340	yegP	hypothetical protein	918.075	3902.07	-2.0876	0	0
K427_13370	yegS	lipid kinase	10.8983	47.5219	-2.1245	2.2371e-06	6.1102e-06
K427_13525	metG	methionine--tRNA ligase	187.887	70.0948	1.4225	1.1787e-15	5.7109e-15
K427_13625	mlrA	MerR family transcriptional regulator	53.6198	133.853	-1.3198	3.875e-08	1.2441e-07
K427_13650	osmF	osmoprotectant uptake system substrate-binding protein	31.8231	108.112	-1.7644	4.298e-10	1.5918e-09
K427_13670	dld	lactate dehydrogenase	1035.78	431.921	1.2619	4.8918e-67	5.8987e-66
K427_13690	yohC	membrane protein	119.01	510.464	-2.1007	1.9835e-53	1.995e-52
K427_13705	yohF	oxidoreductase	16.5655	71.1508	-2.1027	9.0345e-09	3.0776e-08
K427_13770	preA	dihydropyrimidine dehydrogenase	822.606	264.142	1.6389	7.4591e-76	9.7715e-75
K427_13780	mglC	beta-methylgalactoside transporter permease	178.297	75.903	1.2321	1.7356e-12	7.2224e-12
K427_13785	mglA	sugar ABC transporter ATP-binding protein	120.318	33.5293	1.8434	2.9406e-14	1.3278e-13
K427_13790	mglB	sugar ABC transporter substrate-binding protein	1465.17	267.179	2.4552	5.4346e-216	1.9885e-214
K427_13890	psuT	nucleoside permease	318.231	134.249	1.2452	2.1862e-21	1.2438e-20
K427_13900	psuG	pseudouridine-5'-phosphate glycosidase	615.973	178.471	1.7872	7.8493e-64	9.1028e-63
K427_13905	psuK	pseudouridine kinase	272.894	93.5917	1.5439	1.9577e-24	1.2219e-23
K427_13970	yeiQ	D-mannonate oxidoreductase	690.518	1560.83	-1.1766	1.043e-64	1.2229e-63
K427_14120	ccmH	heme lyase subunit CcmH	88.9303	38.2815	1.216	7.9868e-07	2.2752e-06
K427_14130	ccmF	cytochrome C biogenesis protein CcmF	50.5682	13.4645	1.9091	4.7449e-07	1.3832e-06
K427_14145	ccmC	heme ABC transporter permease	27.4638	7.12828	1.9459	0.00017301	0.00038771
K427_14160	napC	cytochrome C	82.3913	27.3251	1.5923	1.0556e-08	3.5785e-08
K427_14165	napB	nitrate reductase	46.2089	3.03612	3.9279	1.0488e-11	4.2156e-11
K427_14170	napH	quinol dehydrogenase	105.06	13.4645	2.964	3.0128e-20	1.6738e-19
K427_14175	napG	quinol dehydrogenase	132.088	13.5965	3.2802	3.6496e-27	2.4128e-26
K427_14180	napA	nitrate reductase	1739.81	173.983	3.3219	0	0
K427_14190	napF	ferredoxin	265.483	44.0897	2.5901	6.8242e-43	6.0344e-42
K427_14200	eco	ecotin	503.067	244.078	1.0434	7.5401e-26	4.8638e-25
K427_14295	atoD	acetyl-CoA:acetoacetyl-CoA transferase subunit alpha	2104.25	1.58406	10.375	0	0
K427_14300	atoA	acetate CoA-transferase	877.097	0	10.698	3.1022e-133	6.8578e-132
K427_14305	atoE	short-chain fatty acid transporter	1647.39	3.30013	8.9634	0	0
K427_14310	atoB	acetyl-CoA acetyltransferase	1685.32	3.43214	8.9397	0	0
K427_14340	gyrA	DNA gyrase subunit A	406.29	191.672	1.0839	2.6604e-22	1.564e-21
K427_14365	nrdA	ribonucleotide-diphosphate reductase subunit alpha	197.042	39.4696	2.3197	7.1833e-29	4.9496e-28
K427_14385	inaA	hypothetical protein	6.10306	156.294	-4.6786	1.0831e-35	8.2384e-35
K427_14390	glpQ	glycerophosphodiester phosphodiesterase	138.191	2794.02	-4.3376	0	0
K427_14395	glpT	sn-glycerol-3-phosphate transporter	35.7465	1425.79	-5.3178	0	0
K427_14405	glpA	glycerol-3-phosphate dehydrogenase	36.6184	3244.82	-6.4694	0	0
K427_14410	glpB	glycerol-3-phosphate dehydrogenase	0	715.864	-9.6814	7.2659e-122	1.4147e-120
K427_14415	glpC	glycerol-3-phosphate dehydrogenase	5.2312	916.908	-7.4535	1.0778e-197	3.5738e-196
K427_14560	menF	isochorismate synthase	33.5668	73.7909	-1.1364	0.00034577	0.00074497
K427_14565	elaB	protein ElaB	600.716	1979.68	-1.7205	1.5247e-151	3.9949e-150
K427_14650	nuoF	NADH dehydrogenase	870.994	419.381	1.0544	3.5738e-44	3.2137e-43
K427_14725	yfbV	hypothetical protein	197.914	592.835	-1.5828	3.527e-41	3.0304e-40
K427_14745	pta	phosphate acetyltransferase	862.276	384.795	1.1641	3.2782e-50	3.2061e-49
K427_14805	hisQ	amino acid ABC transporter permease	40.9777	84.0873	-1.037	0.00044311	0.00093757
K427_14905	fabB	3-oxoacyl-ACP synthase	858.788	220.845	1.9593	9.2095e-99	1.4695e-97
K427_14945	prmB	SAM-dependent methyltransferase	54.4916	23.1009	1.2381	9.1084e-05	0.00021011
K427_14995	sixA	phosphohistidine phosphatase	322.59	881.795	-1.4507	1.0883e-52	1.0894e-51
K427_15040	yfdC	membrane protein	23.9763	84.3513	-1.8148	1.7809e-08	5.9241e-08
K427_15090	cutC	copper homeostasis protein CutC	63.6462	327.769	-2.3645	1.4847e-40	1.2553e-39
K427_15205	otsA	trehalose-6-phosphate synthase	47.0808	230.349	-2.2906	6.539e-28	4.364e-27
K427_15210	otsB	trehalose phosphatase	30.5153	214.772	-2.8152	5.107e-33	3.7633e-32
K427_15225	araF	sugar ABC transporter substrate-binding protein	711.879	327.109	1.1219	1.1018e-39	9.206e-39
K427_15280	ftnA	ferritin	753.292	161.442	2.2222	1.6658e-100	2.762e-99
K427_15295	yecA	hypothetical protein	112.907	47.1259	1.2605	1.1629e-08	3.911e-08
K427_15450	ompN	porin	2191	205.268	3.416	0	0
K427_15575	yodD	hypothetical protein	523.991	2127.13	-2.0213	1.5e-205	5.3055e-204
K427_15590	yedP	mannosyl-3-phosphoglycerate phosphatase	180.912	708.076	-1.9686	3.4435e-67	4.176e-66
K427_16000	soxS	AraC family transcriptional regulator	16.1295	50.558	-1.6482	5.0884e-05	0.00012188
K427_16205	ldtA	L%2CD-transpeptidase	107.24	519.968	-2.2776	2.1124e-60	2.3471e-59
K427_16375	plaP	putrescine/spermidine ABC transporter	21.7967	5.67622	1.9411	0.00083604	0.001711
K427_16390	yeeY	LysR family transcriptional regulator	86.7507	227.313	-1.3897	7.2677e-14	3.2335e-13
K427_16565	wcaN	UTP--glucose-1-phosphate uridylyltransferase	99.3927	303.084	-1.6085	2.1922e-22	1.2959e-21
K427_16800	gmhB	D%2CD-heptose 1%2C7-bisphosphate phosphatase	1.74373	16.6327	-3.2538	0.00033558	0.00072375
K427_16970	tsf	elongation factor Ts	445.088	218.469	1.0267	1.4847e-22	8.8261e-22
K427_17040	erpA	iron-sulfur cluster insertion protein ErpA	241.507	507.692	-1.0719	5.536e-19	2.9594e-18
K427_17045	clcA	chloride channel protein	53.1838	122.633	-1.2053	1.1629e-06	3.2646e-06
K427_17070	fhuA	ferrichrome transporter	43.5933	122.765	-1.4937	5.3194e-09	1.8386e-08
K427_17245	gcd	glucose dehydrogenase	111.599	506.9	-2.1834	7.9629e-56	8.2839e-55
K427_17265	speD	S-adenosylmethionine decarboxylase	70.1852	29.7012	1.2406	8.6824e-06	2.2335e-05
K427_17270	yacL	hypothetical protein	57.5432	19.9328	1.5295	3.244e-06	8.6927e-06
K427_17300	lpd	dihydrolipoamide dehydrogenase	3049.35	1242.56	1.2952	5.3799e-201	1.8717e-199
K427_17315	aceE	pyruvate dehydrogenase	2551.08	1183.43	1.1081	3.0983e-135	7.0703e-134
K427_17375	guaC	guanosine 5'-monophosphate oxidoreductase	131.652	60.0624	1.1322	1.1588e-08	3.9035e-08
K427_17570	leuA	2-isopropylmalate synthase	36.6184	91.6116	-1.323	5.2038e-06	1.3685e-05
K427_17610	thiB	thiamine ABC transporter substrate-binding protein	95.0334	37.4895	1.3419	4.5232e-08	1.4435e-07
K427_17750	folA	dihydrofolate reductase	53.1838	123.953	-1.2207	7.688e-07	2.1989e-06
K427_17840	caiF	transcriptional regulator	54.4916	14.7846	1.8819	2.1969e-07	6.6795e-07
K427_17850	carB	carbamoyl phosphate synthase large subunit	702.724	75.243	3.2233	5.8504e-135	1.3208e-133
K427_17855	carA	carbamoyl phosphate synthase small subunit	49.6964	3.03612	4.0328	1.2047e-12	5.0428e-12
K427_17880	rihC	ribonucleoside hydrolase	37.4902	13.7285	1.4493	0.00029181	0.00063452
K427_17930	nhaA	pH-dependent sodium/proton antiporter	175.245	810.116	-2.2088	1.8336e-89	2.6837e-88
K427_18085	arcA	TorR family transcriptional regulator	1572.85	3319.01	-1.0774	6.1924e-116	1.163e-114
K427_18180	lplA	lipoate--protein ligase	64.0822	27.7211	1.2089	3.015e-05	7.4057e-05
K427_18220	yjjI	hypothetical protein	213.171	74.4509	1.5177	4.9819e-19	2.6835e-18
K427_18255	osmY	hypothetical protein	1659.16	5505.41	-1.7304	0	0
K427_18455	nirB	nitrite reductase	206.196	38.6775	2.4145	2.0621e-31	1.4885e-30
K427_18600	mrcA	penicillin-binding protein 1A	35.7465	15.7086	1.1862	0.00211	0.0039732
K427_18645	yhgE	membrane protein	35.3106	76.563	-1.1165	0.00033411	0.00072132
K427_18660	pck	phosphoenolpyruvate carboxykinase	5280.46	2453.45	1.1059	2.1367e-277	1.106e-275
K427_18680	yhgF	transcription accessory protein	110.727	43.9577	1.3328	4.2178e-09	1.4747e-08
K427_18695	feoB	ferrous iron transporter B	521.376	1245.07	-1.2558	4.4317e-58	4.7986e-57
K427_18700	feoC	ferrous iron transporter C	19.1811	49.634	-1.3716	0.00054389	0.0011394
K427_18750	malP	maltose phosphorylase	282.049	109.3	1.3676	1.3277e-21	7.5951e-21
K427_18805	glpD	glycerol-3-phosphate dehydrogenase	145.602	15733	-6.7556	0	0
K427_18985	yhhA	hypothetical protein	424.599	1326.52	-1.6435	2.6089e-95	4.0121e-94
K427_19005	ugpA	glycerol-3-phosphate transporter permease	11.7702	42.3737	-1.848	5.2141e-05	0.00012447
K427_19010	ugpB	glycerol-3-phosphate ABC transporter substrate-binding protein	299.486	949.513	-1.6647	4.2814e-70	5.3448e-69
K427_19085	rpoH	RNA polymerase factor sigma-32	536.198	1530.6	-1.5133	1.9932e-96	3.0877e-95
K427_19170	nikA	nickel ABC transporter substrate-binding protein	325.642	23.6289	3.7847	3.0341e-71	3.8328e-70
K427_19175	nikB	nickel transporter permease NikB	23.5404	2.37609	3.3085	4.8169e-06	1.2715e-05
K427_19220	sgcC	PTS system galactitol-specific transporter subunit IIC	108.111	34.3214	1.6553	1.7657e-11	7.0173e-11
K427_19265	yhiM	membrane protein	37.9262	111.676	-1.5581	8.4233e-09	2.8786e-08
K427_19280	uspB	universal stress protein UspB	569.764	1485.85	-1.3829	5.4944e-81	7.6714e-80
K427_19305	dtpB	peptide ABC transporter permease	1606.85	707.68	1.1831	3.8943e-94	5.8614e-93
K427_19315	prlC	oligopeptidase A	370.979	759.426	-1.0336	6.4953e-26	4.2026e-25
K427_19320	rlmJ	hypothetical protein	82.3913	181.375	-1.1384	1.9181e-08	6.3505e-08
K427_19380	dctR	LuxR family transcriptional regulator	27.0278	69.9628	-1.3721	4.0086e-05	9.7224e-05
K427_19415	hemN	coproporphyrinogen III oxidase	0	16.8967	-5.2765	2.9208e-05	7.1826e-05
K427_19425	--	hypothetical protein	3.05153	31.0212	-3.3457	7.0234e-07	2.017e-06
K427_19445	hdeB	acid-resistance protein	1192.28	2934.87	-1.2996	1.4677e-142	3.5803e-141
K427_19450	hdeA	acid-resistance protein	2395.89	8147.36	-1.7658	0	0
K427_19460	hdeD	acid-resistance membrane protein	177.861	990.831	-2.4779	5.8333e-126	1.1904e-124
K427_19465	gadE	LuxR family transcriptional regulator	398.879	857.77	-1.1046	1.2708e-32	9.2999e-32
K427_19490	gadW	AraC family transcriptional regulator	15.2577	82.8993	-2.4418	7.819e-12	3.1668e-11
K427_19505	gadX	transcriptional regulator	48.8245	272.591	-2.4811	5.1402e-36	3.9668e-35
K427_19515	gadB	glutamate decarboxylase	77.5961	175.963	-1.1812	1.0608e-08	3.5906e-08
K427_19585	zipA	cell division protein ZipA	292.511	611.184	-1.0631	3.2323e-22	1.8846e-21
K427_19595	cysZ	sulfate transporter	27.8997	67.1906	-1.268	0.00016846	0.00037873
K427_19650	cysA	sulfate/thiosulfate transporter subunit	57.5432	124.085	-1.1086	5.6936e-06	1.4899e-05
K427_19655	cysW	sulfate/thiosulfate transporter permease subunit	17.8733	69.0387	-1.9496	7.9039e-08	2.4718e-07
K427_19660	cysU	sulfate/thiosulfate transporter subunit	13.9499	39.3376	-1.4957	0.00094149	0.0019045
K427_19725	amiA	N-acetylmuramoyl-l-alanine amidase I	22.6685	53.7261	-1.2449	0.00093042	0.0018841
K427_19755	eutB	ethanolamine ammonia-lyase	47.5167	18.3487	1.3728	8.5419e-05	0.00019812
K427_19780	eutG	ethanolamine utilization protein EutG	20.4889	6.07224	1.7545	0.0023678	0.0044234
K427_19800	eutM	carboxysome structural protein EutM	36.6184	14.5206	1.3345	0.00072056	0.0014861
K427_19805	eutD	phosphotransacetylase	20.9248	5.80823	1.849	0.001494	0.0029114
K427_19815	eutQ	ethanolamine utilization protein EutQ	30.9512	5.80823	2.4138	6.2918e-06	1.6384e-05
K427_19835	maeB	malic enzyme	1942.08	789.787	1.2981	4.6677e-129	1.0108e-127
K427_19845	talA	transaldolase	133.831	465.846	-1.7994	1.6329e-39	1.3537e-38
K427_19860	ypfG	hypothetical protein	45.337	162.762	-1.844	2.437e-15	1.1596e-14
K427_19870	aegA	(Fe-S)-binding protein	290.767	85.6714	1.763	1.5282e-30	1.0811e-29
K427_19910	ypfN	hypothetical protein	50.1323	115.769	-1.2074	2.2316e-06	6.103e-06
K427_19975	yfgD	arsenate reductase	82.3913	37.2255	1.1462	5.268e-06	1.3837e-05
K427_19990	uraA	uracil transporter	36.6184	3.96016	3.2089	1.7717e-08	5.9027e-08
K427_19995	upp	uracil phosphoribosyltransferase	113.779	22.0449	2.3677	1.0455e-17	5.4382e-17
K427_20140	rodZ	cytoskeletal protein RodZ	274.202	718.768	-1.3903	1.953e-40	1.6382e-39
K427_20145	rlmN	ribosomal RNA large subunit methyltransferase N	34.4387	78.2791	-1.1846	0.00013068	0.00029725
K427_20155	pbpC	penicillin-binding protein 1C	34.8746	73.3949	-1.0735	0.00070281	0.0014509
K427_20235	iscR	transcriptional regulator	105.932	249.622	-1.2366	1.2928e-12	5.401e-12
K427_20270	csiE	stationary phase inducible protein CsiE	1076.75	2641.69	-1.2948	1.085e-127	2.3026e-126
K427_20290	yphA	membrane protein	27.8997	70.4908	-1.3372	5.4983e-05	0.00013025
K427_20335	glyA	serine hydroxymethyltransferase	915.895	308.364	1.5705	9.9136e-80	1.3401e-78
K427_20345	hmp	dihydropteridine reductase	256.329	36.9615	2.7939	1.3987e-44	1.2631e-43
K427_20385	purL	phosphoribosylformylglycinamidine synthase	108.983	46.5978	1.2258	3.9061e-08	1.2522e-07
K427_20410	pgpC	hypothetical protein	43.1574	98.3439	-1.1882	1.7143e-05	4.2953e-05
K427_20460	era	GTP-binding protein Era	88.4944	182.827	-1.0468	1.7371e-07	5.3274e-07
K427_20465	rnc	ribonuclease III	43.5933	140.718	-1.6906	5.4294e-12	2.2074e-11
K427_20495	rseA	anti-RNA polymerase sigma factor SigE	680.927	2086.61	-1.6156	5.7366e-145	1.4323e-143
K427_20500	rpoE	RNA polymerase sigma factor RpoE	388.416	1193.72	-1.6198	4.6042e-84	6.5141e-83
K427_20525	srmB	ATP-dependent RNA helicase SrmB	136.447	65.4746	1.0593	3.1091e-08	1.0105e-07
K427_20595	kgtP	alpha-ketoglutarate transporter	24.8482	70.6228	-1.507	8.2368e-06	2.1266e-05
K427_20685	yaiA	hypothetical protein	30.5153	92.9317	-1.6066	7.288e-08	2.288e-07
K427_20690	aroL	shikimate kinase	27.8997	70.4908	-1.3372	5.4983e-05	0.00013025
K427_20695	yaiI	hypothetical protein	13.9499	58.0823	-2.0578	3.113e-07	9.2529e-07
K427_20710	psiF	hypothetical protein	37.0543	115.373	-1.6386	1.1121e-09	4.0205e-09
K427_20745	yaiZ	membrane protein	49.2604	108.904	-1.1446	1.2128e-05	3.0825e-05
K427_20945	prpD	2-methylcitrate dehydratase	1187.48	362.75	1.7109	7.9286e-115	1.4632e-113
K427_20950	prpC	methylcitrate synthase	532.274	219.129	1.2804	5.3722e-36	4.1309e-35
K427_20970	yahO	hypothetical protein	308.205	620.292	-1.0091	1.3715e-20	7.6594e-20
K427_21095	betT	choline transporter	187.887	396.148	-1.0762	2.9943e-15	1.4185e-14
K427_21150	ypjA	autotransporter	448.575	57.8183	2.9558	1.0465e-80	1.4516e-79
K427_21165	ykgG	hypothetical protein	66.2618	6.86427	3.271	2.2262e-14	1.016e-13
K427_21170	ykgF	amino acid dehydrogenase	212.735	27.4571	2.9538	3.397e-39	2.7943e-38
K427_21175	ykgE	hypothetical protein	66.2618	8.05232	3.0407	1.3105e-13	5.77e-13
K427_21880	glpT	phosphoglycerate transporter	77.5961	13.3325	2.541	1.9988e-13	8.6923e-13
K427_22065	ahr	alcohol dehydrogenase	31.3872	78.4111	-1.3209	2.5573e-05	6.3328e-05
K427_22205	pyrB	aspartate carbamoyltransferase catalytic subunit	282.485	7.78831	5.1807	2.1231e-70	2.6661e-69
K427_22210	pyrI	aspartate carbamoyltransferase regulatory subunit	187.451	8.97635	4.3842	4.5599e-45	4.1893e-44
K427_22215	ridA	endoribonuclease L-PSP	1637.36	711.244	1.203	3.7317e-98	5.8664e-97
K427_22245	treB	PTS system trehalose(maltose)-specific transporter subunits IIBC	44.4652	626.629	-3.8169	1.8248e-122	3.5858e-121
K427_22250	treC	trehalose-6-phosphate hydrolase	26.5919	99.2679	-1.9003	2.6072e-10	9.7932e-10
K427_22335	ytfQ	sugar ABC transporter substrate-binding protein	360.081	160.65	1.1644	6.0184e-22	3.4802e-21
K427_22395	ytfK	hypothetical protein	911.972	2315.5	-1.3443	1.9256e-119	3.715e-118
K427_22405	cysQ	adenosine-3'(2')%2C5'-bisphosphate nucleotidase	516.581	1245.07	-1.2692	4.0253e-59	4.4263e-58
K427_22410	cpdB	2'%2C 3'-cyclic nucleotide 2'-phosphodiesterase	291.203	97.8159	1.5739	1.3414e-26	8.7863e-26
K427_22455	cycA	amino acid permease	1417.65	586.895	1.2723	3.9824e-92	5.9102e-91
K427_22465	fklB	peptidylprolyl isomerase	39.6699	13.5965	1.5448	9.9949e-05	0.00022931
K427_22545	rpsR	30S ribosomal protein S18	64.954	19.2728	1.7529	6.3368e-08	1.9953e-07
K427_22550	priB	primosomal replication protein N	110.291	48.8419	1.1751	8.1439e-08	2.5417e-07
K427_22615	bsmA	biofilm stress and motility protein A	2996.6	7619.47	-1.3464	0	0
K427_22625	yjfN	hypothetical protein	958.181	2274.85	-1.2474	1.9553e-103	3.3464e-102
K427_22630	aidB	isovaleryl-CoA dehydrogenase	220.146	582.671	-1.4042	1.2505e-33	9.2796e-33
K427_22720	miaA	tRNA delta(2)-isopentenylpyrophosphate transferase	481.27	964.694	-1.0032	8.3403e-31	5.9397e-30
K427_22770	araJ	MFS transporter	25.2841	69.8308	-1.4656	1.4623e-05	3.6812e-05
K427_22815	brnQ	branched-chain amino acid ABC transporter substrate-binding protein	152.577	439.181	-1.5253	2.9149e-29	2.0349e-28
K427_22875	tsx	nucleoside-specific channel-forming protein Tsx	254.585	108.244	1.2339	3.219e-17	1.6422e-16
K427_22880	yajI	hypothetical protein	77.5961	226.125	-1.5431	4.191e-16	2.0589e-15
K427_22930	ispA	geranyl transferase	76.2883	176.491	-1.2101	4.826e-09	1.6735e-08
K427_22950	yajL	oxidative-stress-resistance chaperone	59.7228	125.273	-1.0687	1.0392e-05	2.6475e-05
K427_22980	cyoE	protoheme IX farnesyltransferase	645.617	218.601	1.5624	2.3388e-56	2.4818e-55
K427_22985	cyoD	cytochrome o ubiquinol oxidase subunit IV	166.526	46.3338	1.8456	3.5818e-19	1.9392e-18
K427_22990	cyoC	cytochrome o ubiquinol oxidase subunit III	299.05	132.533	1.174	1.0736e-18	5.7101e-18
K427_22995	cyoB	cytochrome o ubiquinol oxidase subunit I	1493.94	614.748	1.2811	6.6276e-98	1.0342e-96
K427_23030	bolA	transcriptional regulator BolA	643.873	1838.44	-1.5136	1.7063e-115	3.1765e-114
K427_23040	tig	trigger factor	452.498	201.836	1.1647	3.5569e-27	2.3589e-26
K427_23050	clpX	Clp protease ClpX	953.386	2427.97	-1.3486	7.8125e-126	1.579e-124
K427_23060	hupB	transcriptional regulator HU subunit alpha	2036.24	931.957	1.1276	5.1939e-111	9.4211e-110
K427_23155	ybaY	hypothetical protein	264.175	1504.46	-2.5097	3.3915e-193	1.0743e-191
K427_23160	ybaZ	cysteine methyltransferase	70.6212	225.861	-1.6773	3.9314e-18	2.0703e-17
K427_23165	ybaA	hypothetical protein	4.35933	121.445	-4.8001	2.2119e-28	1.5045e-27
K427_23175	ylaC	membrane protein	350.49	34.9814	3.3247	6.0824e-70	7.5487e-69
K427_23265	recR	recombination protein RecR	24.4122	55.1782	-1.1765	0.0014132	0.0027641
K427_23280	adk	adenylate kinase	40.1058	12.8045	1.6472	4.4621e-05	0.00010749
K427_23330	ushA	5'-nucleotidase	180.476	85.4074	1.0794	1.0935e-10	4.1665e-10
K427_23345	--	hypothetical protein	27.0278	57.4223	-1.0872	0.0024285	0.0045288
K427_23365	ybaT	amino acid permease	233.224	783.451	-1.7481	1.5225e-62	1.7372e-61
K427_23445	allR	transcriptional regulator	214.915	1161.91	-2.4347	3.0051e-144	7.4157e-143
K427_23475	allB	allantoinase	3919.04	60.7224	6.0121	0	0
K427_23495	allE	hypothetical protein	96.7771	21.6489	2.1604	6.1872e-14	2.7702e-13
K427_23500	allC	allantoate amidohydrolase	54.4916	8.05232	2.7586	1.375e-10	5.2294e-10
K427_23505	allD	ureidoglycolate dehydrogenase	21.3607	4.62018	2.2089	0.00035574	0.00076336
K427_23550	murI	glutamate racemase	2.6156	54.1221	-4.371	5.2062e-13	2.2186e-12
K427_23555	btuB	vitamin B12/cobalamin outer membrane transporter	240.635	55.1782	2.1247	1.0211e-31	7.3963e-31
K427_23615	argB	acetylglutamate kinase	15.6936	44.8818	-1.516	0.00035465	0.0007618
K427_23685	frwA	PTS fructose transporter subunit IIA	70.1852	24.685	1.5075	3.5652e-07	1.0523e-06
K427_23720	katG	peroxidase	5319.25	2127.4	1.3221	0	0
K427_23845	hslV	ATP-dependent protease subunit HslV	55.3635	188.767	-1.7696	1.3659e-16	6.9017e-16
K427_23875	glpF	glycerol uptake facilitator GlpF	238.455	6346.15	-4.7341	0	0
K427_23880	glpK	glycerol kinase	1234.56	17587.1	-3.8324	0	0
K427_23885	glpX	fructose 1%2C6-bisphosphatase	71.493	1236.62	-4.1125	4.5349e-252	2.0477e-250
K427_23965	cpxP	periplasmic repressor CpxP	763.319	3084.43	-2.0146	7.1041e-296	3.7691e-294
K427_24005	sodA	superoxide dismutase	225.377	534.753	-1.2465	1.3407e-25	8.5963e-25
K427_24400	yhjA	cytochrome C peroxidase	55.3635	8.58034	2.6898	1.659e-10	6.2871e-10
K427_24410	treF	trehalase	166.526	343.61	-1.045	8.5107e-13	3.5837e-12
K427_24430	yhjD	membrane protein	118.574	306.252	-1.3689	9.7889e-18	5.1043e-17
K427_24485	dctA	C4-dicarboxylate transporter	1443.81	504.392	1.5173	4.5883e-119	8.7725e-118
K427_24525	yhjR	hypothetical protein	17.4373	44.2217	-1.3426	0.0013481	0.0026514
K427_24590	dppC	peptide transporter	31.8231	75.507	-1.2465	8.5179e-05	0.00019778
K427_24660	yhjY	hypothetical protein	34.4387	76.299	-1.1476	0.0002416	0.00052969
K427_24690	ghrB	bifunctional glyoxylate/hydroxypyruvate reductase B	115.958	46.5978	1.3153	2.5666e-09	9.1238e-09
K427_24705	yiaG	transcriptional regulator	101.136	444.065	-2.1345	1.0646e-47	1.0041e-46
K427_24715	cspA	cold-shock protein	140.37	311.664	-1.1508	1.0215e-13	4.5351e-13
K427_24805	xylF	D-xylose transporter subunit XylF	173.501	25.081	2.7903	1.0823e-30	7.6821e-30
K427_24810	xylG	xylose transporter	42.2855	13.8605	1.6092	3.6646e-05	8.9393e-05
K427_24815	xylH	sugar ABC transporter permease	82.3913	30.4932	1.434	9.752e-08	3.0391e-07
K427_24875	yiaK	2%2C3-diketo-L-gulonate reductase	63.6462	13.3325	2.2551	4.4584e-10	1.6484e-09
K427_24895	yiaN	L-dehydroascorbate transporter large permease subunit	14.3858	0	4.446	9.0764e-05	0.0002096
K427_24905	yiaO	hypothetical protein	25.72	1.18805	4.4362	1.6846e-07	5.1815e-07
K427_24910	lyxK	xylulose kinase	35.3106	5.41221	2.7058	3.085e-07	9.1826e-07
K427_24915	sgbH	3-keto-L-gulonate-6-phosphate decarboxylase	22.2326	2.24409	3.3085	8.8394e-06	2.2683e-05
K427_24920	sgbU	xylulose 5-phosphate 3-epimerase	37.4902	4.35617	3.1054	1.8953e-08	6.2946e-08
K427_24925	sgbE	ribulose 5-phosphate epimerase	30.9512	3.43214	3.1728	2.5445e-07	7.6814e-07
K427_24950	yibF	glutathione S-transferase	32.259	70.2268	-1.1223	0.00055699	0.0011642
K427_24960	yibI	hypothetical protein	3.9234	18.4807	-2.2358	0.0022653	0.0042469
K427_25000	yibT	hypothetical protein	399.315	921	-1.2057	1.5261e-40	1.2852e-39
K427_25070	fdhF	formate dehydrogenase	514.401	207.116	1.3125	5.1326e-36	3.9668e-35
K427_25075	fdhF	spermidine/putrescine ABC transporter substrate-binding protein	103.752	32.0773	1.6935	2.2943e-11	9.0502e-11
K427_25265	yjdN	hypothetical protein	11.7702	41.7136	-1.8254	6.9586e-05	0.00016318
K427_25290	proP	glycine/betaine ABC transporter	150.397	314.436	-1.064	3.4769e-12	1.419e-11
K427_25320	adiY	transcriptional regulator	20.4889	2.37609	3.1082	3.2215e-05	7.8946e-05
K427_25375	fumB	fumarate hydratase	50.1323	15.5766	1.6864	3.5747e-06	9.5545e-06
K427_25440	lysU	lysine--tRNA ligase	1164.81	370.011	1.6545	6.0832e-108	1.0758e-106
K427_25520	fxsA	phage T7 F exclusion suppressor FxsA	21.7967	68.2467	-1.6467	2.5547e-06	6.9242e-06
K427_25540	groL	molecular chaperone GroEL	2602.08	1257.09	1.0496	1.3493e-127	2.8073e-126
K427_25595	blc	membrane protein	194.862	444.726	-1.1905	5.2543e-20	2.9115e-19
K427_25700	aceB	malate synthase	161.295	65.6066	1.2978	3.3942e-12	1.3879e-11
K427_25705	aceA	isocitrate lyase	552.327	205.664	1.4252	5.2709e-43	4.6804e-42
K427_25720	iclR	transcriptional repressor IclR	59.7228	15.3126	1.9636	2.5654e-08	8.3889e-08
K427_25740	yjbB	membrane protein	104.624	269.555	-1.3654	9.8777e-16	4.797e-15
K427_25845	--	hypothetical protein	22.2326	69.8308	-1.6512	1.8587e-06	5.0963e-06
K427_25880	psiE	phosphate-starvation-inducible protein PsiE	6.10306	24.421	-2.0005	0.0011438	0.0022836
K427_25890	malG	maltose transporter permease	364.44	169.363	1.1056	1.0394e-20	5.8513e-20
K427_25900	malE	sugar ABC transporter substrate-binding protein	2120.38	185.071	3.5182	0	0
K427_25910	malK	maltose/maltodextrin transporter ATP-binding protein	190.503	46.7298	2.0274	3.6441e-24	2.2417e-23
K427_25915	lamB	maltoporin	2976.55	450.006	2.7256	0	0
K427_25925	malM	maltose-binding protein	298.178	141.906	1.0712	1.5857e-16	7.9746e-16
K427_25975	yjbJ	hypothetical protein	1721.94	4596.95	-1.4166	6.1576e-257	3.039e-255
K427_26075	aphA	acid phosphatase	181.784	42.3737	2.101	4.5776e-24	2.8077e-23
K427_26175	actP	acetate permease	314.744	693.027	-1.1387	4.3281e-28	2.9252e-27
K427_26180	yjcH	membrane protein	33.1309	131.081	-1.9842	6.7784e-14	3.0221e-13
K427_26190	acs	acetyl-CoA synthetase	557.994	1293.25	-1.2127	8.7061e-57	9.2846e-56
K427_26205	nrfA	cytochrome C nitrite reductase	544.044	14.3886	5.2407	4.7813e-134	1.0681e-132
K427_26210	nrfB	cytochrome C nitrite reductase	85.0069	4.22417	4.3308	3.0625e-21	1.7378e-20
K427_26215	nrfC	nitrite reductase	51.4401	4.22417	3.6062	2.9531e-12	1.2146e-11
K427_26220	nrfD	nitrite reductase	92.8537	3.30013	4.8144	6.4543e-24	3.9474e-23
K427_26245	gltP	glutamate:protein symporter	37.4902	15.1806	1.3043	0.00075903	0.0015609
K427_26370	--	acetolactate synthase	167.398	48.8419	1.7771	1.9476e-18	1.0333e-17
K427_26630	fadA	3-ketoacyl-CoA thiolase	105.496	329.485	-1.643	5.8324e-25	3.6621e-24
K427_26660	hemG	protoporphyrinogen oxidase	0	21.2528	-5.6074	2.4858e-06	6.7547e-06
K427_26810	yjiY	carbon starvation protein A	233.66	106.66	1.1314	3.0157e-14	1.3588e-13
K427_26840	mrr	restriction endonuclease	15.6936	2.77211	2.5011	0.0010471	0.0020983
K427_26910	yjiN	membrane protein	17.0014	93.9877	-2.4668	2.2835e-13	9.8902e-13
K427_26915	yjiM	hypothetical protein	81.9554	20.4608	2.002	4.0912e-11	1.6079e-10
K427_26960	yjiG	hypothetical protein	20.0529	3.56414	2.4922	0.00021736	0.00048052
K427_26965	iadA	isoaspartyl dipeptidase	83.6991	29.1731	1.5206	2.2476e-08	7.3837e-08
K427_27005	uxuB	D-mannonate oxidoreductase	232.352	96.6278	1.2658	2.2372e-16	1.1171e-15
K427_27040	fimG	fimbrial protein	27.4638	5.41221	2.3432	2.8415e-05	6.9958e-05
K427_27045	fimF	fimbrial protein	32.259	8.97635	1.8455	8.198e-05	0.00019119
K427_27050	fimD	fimbrial protein	96.7771	27.5891	1.8106	1.5821e-11	6.2993e-11
K427_27055	fimC	molecular chaperone FimC	32.259	6.07224	2.4094	4.1012e-06	1.0907e-05
K427_27065	fimI	fimbrial protein	71.493	28.9091	1.3063	3.2387e-06	8.6894e-06
K427_27115	luxS	S-ribosylhomocysteinase	157.808	391.923	-1.3124	7.9161e-21	4.48e-20
K427_27165	proX	glycine/betaine ABC transporter substrate-binding protein	48.8245	15.1806	1.6854	4.8285e-06	1.2729e-05
K427_27185	nrdF	ribonucleotide-diphosphate reductase subunit beta	1.3078	14.6526	-3.4859	0.00051781	0.0010866
K427_27190	nrdE	ribonucleoside-diphosphate reductase	4.35933	25.873	-2.5693	8.0686e-05	0.00018838
K427_27220	ygaM	hypothetical protein	127.728	351.662	-1.4611	2.9359e-22	1.7212e-21
K427_27265	ygaU	peptidoglycan-binding protein	371.851	891.167	-1.261	2.3534e-42	2.0553e-41
K427_27270	csiR	transcriptional regulator	38.798	168.175	-2.1159	6.9859e-19	3.7251e-18
K427_27275	gabP	gamma-aminobutyrate transporter	44.9011	384.003	-3.0963	1.62e-63	1.8685e-62
K427_27280	gabT	4-aminobutyrate aminotransferase	219.274	1237.02	-2.4961	3.6572e-158	1.008e-156
K427_27285	gabD	succinate-semialdehyde dehydrogenase	271.15	1062.77	-1.9707	4.5982e-100	7.5647e-99
K427_27290	lhgO	hydroxyglutarate oxidase	47.9526	277.343	-2.532	1.7376e-37	1.3915e-36
K427_27295	csiD	carbon starvation induced protein	149.089	487.363	-1.7088	2.7827e-38	2.254e-37
K427_27345	bamE	membrane biogenesis protein	128.6	287.639	-1.1614	5.8195e-13	2.4651e-12
K427_27415	yfiN	diguanylate cyclase	10.0265	47.3899	-2.2408	9.776e-07	2.7552e-06
K427_27420	yfiR	hypothetical protein	15.6936	40.6576	-1.3733	0.0017295	0.0033217
K427_27440	pheA	chorismate mutase	257.636	684.315	-1.4093	1.9927e-39	1.6455e-38
K427_27460	rluD	23S rRNA pseudouridylate synthase	69.3134	148.902	-1.1032	7.4855e-07	2.1438e-06
K427_27515	zitB	zinc transporter ZitB	43.5933	106	-1.2819	1.8408e-06	5.0538e-06
K427_27520	ybgS	hypothetical protein	205.324	1380.91	-2.7496	2.9283e-197	9.5609e-196
K427_27585	modA	molybdate transporter	42.7214	162.498	-1.9274	3.0817e-16	1.521e-15
K427_27590	modB	molybdate ABC transporter permease	10.0265	32.2093	-1.6837	0.0010103	0.0020296
K427_27650	ybhC	acyl-CoA thioesterase	86.3147	41.3176	1.0628	1.0195e-05	2.6037e-05
K427_27665	bioA	adenosylmethionine-8-amino-7-oxononanoate aminotransferase	3.48746	25.081	-2.8463	3.8715e-05	9.4116e-05
K427_27675	bioF	8-amino-7-oxononanoate synthase	1.74373	15.1806	-3.122	0.00078329	0.0016077
K427_27725	moaB	molybdopterin biosynthesis protein B	104.624	34.5854	1.597	1.046e-10	4.0047e-10
K427_27730	moaC	molybdenum cofactor biosynthesis protein MoaC	44.9011	11.7485	1.9343	1.7158e-06	4.7169e-06
K427_27740	moaE	molybdopterin guanine dinucleotide biosynthesis protein MoaE	35.7465	12.2765	1.5419	0.00022544	0.00049631
K427_27745	ybhL	hypothetical protein	373.159	928.657	-1.3154	2.9256e-47	2.7352e-46
K427_27765	clsB	cardiolipin synthase 2	28.7716	72.3389	-1.3301	4.7514e-05	0.0001142
K427_27770	ybhP	hypothetical protein	28.3356	97.4198	-1.7816	2.3789e-09	8.4849e-09
K427_27775	ybhQ	membrane protein	345.695	697.647	-1.013	4.0853e-23	2.4561e-22
K427_27875	yncE	hypothetical protein	62.3384	220.713	-1.824	5.969e-20	3.2989e-19
K427_27935	ydcV	spermidine/putrescine ABC transporter permease	27.0278	67.3227	-1.3166	0.00010026	0.00022977
K427_27940	ydcU	spermidine/putrescine ABC transporter permease	38.798	86.7274	-1.1605	7.7114e-05	0.00018024
K427_27985	ydcL	hypothetical protein	272.022	685.767	-1.334	3.6312e-36	2.8332e-35
K427_28010	rimL	ribosomal-protein-serine acetyltransferase	34.8746	12.5405	1.4756	0.000405	0.00086208
K427_28025	opgD	glucan biosynthesis protein D	163.475	76.167	1.1018	4.5367e-10	1.6744e-09
K427_28035	ydcJ	hypothetical protein	360.517	170.419	1.081	6.7607e-20	3.7171e-19
K427_28080	gapA	glyceraldehyde-3-phosphate dehydrogenase	382.313	854.602	-1.1605	2.234e-35	1.6872e-34
K427_28520	--	vimentin yjdA	22.6685	4.48818	2.3365	0.00014658	0.00033093
K427_28540	yrdA	hypothetical protein	25.2841	55.1782	-1.1259	0.0021522	0.0040493
K427_28580	fmt	methionyl-tRNA formyltransferase	160.423	371.463	-1.2113	1.8988e-17	9.7574e-17
K427_28675	rplR	50S ribosomal protein L18	159.116	78.8071	1.0137	7.1249e-09	2.4507e-08
K427_28680	rplF	50S ribosomal protein L6	458.602	229.293	1	2.2425e-22	1.322e-21
K427_28730	rplV	50S ribosomal protein L22	110.291	45.4098	1.2802	1.1935e-08	4.0078e-08
K427_28735	rpsS	30S ribosomal protein S19	71.9289	22.7049	1.6636	3.744e-08	1.2039e-07
K427_28740	rplB	50S ribosomal protein L2	518.76	219.393	1.2416	1.0592e-33	7.8869e-33
K427_28745	rplW	50S ribosomal protein L23	54.0557	16.5007	1.7119	1.1747e-06	3.2888e-06
K427_28750	rplD	50S ribosomal protein L4	186.579	66.3986	1.4906	1.7613e-16	8.8366e-16
K427_28755	rplC	50S ribosomal protein L3	377.518	165.007	1.194	1.0305e-23	6.2483e-23
K427_28850	bfd	bacterioferritin-associated ferredoxin	41.4136	11.4845	1.8504	7.8219e-06	2.0244e-05
K427_28910	rplA	50S ribosomal protein L1	724.521	308.364	1.2324	6.3692e-46	5.9026e-45
K427_29010	zraP	zinc resistance protein	13201.8	3511.73	1.9105	0	0
K427_29025	zraR	transcriptional regulator	241.507	64.6825	1.9006	4.9489e-28	3.3342e-27
K427_29030	purD	phosphoribosylamine--glycine ligase	53.6198	20.7248	1.3714	3.0392e-05	7.4566e-05
K427_29095	fucA	hypothetical protein	43.1574	7.6563	2.4949	5.6954e-08	1.804e-07
K427_29100	--	multidrug DMT transporter permease	176.989	19.6688	3.1697	6.9922e-35	5.2621e-34
K427_29120	yjhG	dehydratase	151.705	75.111	1.0142	1.5716e-08	5.2524e-08
K427_29310	fdnG	formate dehydrogenase	69.7493	10.1644	2.7787	3.1581e-13	1.3567e-12
K427_29315	fdnG	sulfate ABC transporter substrate-binding protein	14.3858	2.24409	2.6804	0.0011476	0.002289
K427_29355	narU	nitrate/nitrite transporter NarK	91.11	197.612	-1.117	8.1405e-09	2.7865e-08
K427_29360	narZ	nitrate reductase	220.146	615.804	-1.484	1.1425e-38	9.3252e-38
K427_29365	narY	nitrate reductase	81.0835	272.459	-1.7486	7.313e-23	4.3718e-22
K427_29370	narW	nitrate reductase	25.2841	81.8432	-1.6946	1.3865e-07	4.2893e-07
K427_29375	narV	hypothetical protein	27.0278	87.1234	-1.6886	5.9798e-08	1.8885e-07
K427_29845	gltA	type II citrate synthase	3765.59	1841.08	1.0323	1.5272e-179	4.4397e-178
K427_29870	sdhC	succinate dehydrogenase	446.395	190.484	1.2287	7.9213e-29	5.4404e-28
K427_29875	sdhD	succinate dehydrogenase	61.4666	12.4085	2.3085	5.2852e-10	1.9439e-09
K427_29880	sdhA	succinate dehydrogenase	3131.74	1100.79	1.5084	3.9665e-254	1.83e-252
K427_29885	sdhB	succinate dehydrogenase	2531.9	908.328	1.4789	2.0568e-200	7.0402e-199
K427_30090	sra	30S ribosomal subunit S22	561.046	1895.99	-1.7568	7.8756e-150	2.0383e-148
K427_30105	osmC	peroxiredoxin OsmC	285.972	777.907	-1.4437	2.4838e-46	2.312e-45
K427_30115	dosP	c-di-GMP phosphodiesterase	17.4373	64.5505	-1.8883	3.9138e-07	1.1504e-06
K427_30120	dosC	diguanylate cyclase	1.74373	25.081	-3.8463	2.3455e-06	6.3981e-06
K427_30130	gadC	antiporter	5217.25	16295.6	-1.6431	0	0
K427_30265	murB	UDP-N-acetylenolpyruvoylglucosamine reductase	20.0529	66.5306	-1.7302	1.3999e-06	3.8784e-06
K427_30310	tufB	elongation factor Tu	761.139	217.677	1.806	1.82e-79	2.4446e-78
Adapted Es-AgNP was exposed to 1.20 mg/L s-AgNPs in LB medium for 5 h, and untreated wild-type E. coli was used as a biotic control. The differentially expressed genes in Es-AgNP + s-AgNPs compared with control (wild-type E. coli) were identified by considering both the fold change (log2FC > 1) and the p-value (< 0.005).

## Sheet: Es-AgNP + s-AgNPs2
Summary of the total numbers of differentially expressed genes in Es-AgNP + s-AgNPs2 compared to E. coli.
Gene_id	Gene name	Gene description	readcount_Es-AgNP + s-AgNPs2	readcount_E. coli	log2FoldChange	p-value	padj
K427_00085	yieP	GntR family transcriptional regulator	59.7151	145.413	-1.284	9.3035e-08	3.4251e-07
K427_00095	rbsR	transcriptional regulator	43.4708	16.1421	1.4292	6.2671e-05	0.00018084
K427_00140	asnA	asparagine synthetase AsnA	241.606	105.193	1.1996	4.5548e-17	2.5595e-16
K427_00155	mnmG	tRNA uridine 5-carboxymethylaminomethyl modification protein	71.6123	27.038	1.4052	3.7625e-07	1.3124e-06
K427_00175	atpE	ATP F0F1 synthase subunit C	251.215	85.9566	1.5472	4.0908e-24	2.7673e-23
K427_00180	atpF	ATP F0F1 synthase subunit B	506.549	214.152	1.2421	1.411e-35	1.2031e-34
K427_00185	atpH	ATP F0F1 synthase subunit delta	220.786	103.309	1.0957	4.4562e-14	2.2516e-13
K427_00190	atpA	ATP F0F1 synthase subunit alpha	2572.55	936.644	1.4576	7.2892e-214	3.8216e-212
K427_00195	atpG	ATP F0F1 synthase subunit gamma	986.786	387.813	1.3474	3.3523e-75	4.8709e-74
K427_00200	atpD	ATP synthase F0F1 subunit beta	3073.84	1164.25	1.4006	2.3709e-242	1.4928e-240
K427_00335	mdtL	multidrug transporter	10.2957	0	3.9362	0.0011291	0.0026551
K427_00340	tnaB	tryptophan permease	815.877	10.0888	6.3375	3.4276e-202	1.5303e-200
K427_00345	tnaA	cysteine desulfhydrase	4991.82	52.8653	6.5611	0	0
K427_00360	yidC	membrane protein insertase	210.49	61.7435	1.7694	6.4201e-24	4.3311e-23
K427_00415	yidB	hypothetical protein	43.0132	165.994	-1.9483	6.473e-16	3.5401e-15
K427_00490	ibpA	heat shock protein IbpA	41.4116	85.6875	-1.049	0.00072516	0.0017736
K427_00550	emrD	multidrug resistance protein D	28.3704	11.1649	1.3454	0.0018879	0.0042687
K427_01145	gadB	glutamate decarboxylase	273.179	1133.58	-2.053	8.2876e-107	1.7102e-105
K427_01175	miaB	(dimethylallyl)adenosine tRNA methylthiotransferase	121.261	59.1876	1.0347	7.5703e-08	2.8029e-07
K427_01245	rihA	ribonucleoside hydrolase	136.59	66.4516	1.0395	1.0353e-08	4.107e-08
K427_01325	ybeD	hypothetical protein	47.1314	144.337	-1.6147	8.2025e-11	3.5968e-10
K427_01365	yafV	hydrolase	21.9642	52.4618	-1.2561	0.0016716	0.0038218
K427_01375	cspE	cold-shock protein	9390.83	19559	-1.0585	0	0
K427_01380	pagP	phospholipid:lipid A palmitoyltransferase	5.03346	25.2893	-2.3289	0.00034427	0.0008843
K427_01395	dcuC	C4-dicarboxylate transporter	29.7431	11.8375	1.3292	0.0015989	0.0036659
K427_01425	citF	citrate lyase subunit alpha	9.83812	0	4.1925	0.0012145	0.0028404
K427_01535	entH	thioesterase	2.97431	20.7157	-2.8001	0.00027996	0.00072901
K427_01540	entA	2%2C3-dihydroxybenzoate-2%2C3-dehydrogenase	5.03346	71.9668	-3.8377	3.3336e-15	1.7566e-14
K427_01550	entE	enterobactin synthase subunit E	6.17742	91.7408	-3.8925	3.8396e-19	2.261e-18
K427_01555	entC	isochorismate synthase	1.83035	23.406	-3.6767	9.978e-06	3.0627e-05
K427_01570	fepD	iron-enterobactin transporter membrane protein	11.8973	38.6065	-1.6982	0.00046296	0.0011684
K427_01575	fepG	iron-enterobactin transporter permease	2.51673	23.8096	-3.2419	2.5435e-05	7.5982e-05
K427_01580	fepC	iron-enterobactin transporter ATP-binding protein	1.83035	23.0025	-3.6516	1.2589e-05	3.8353e-05
K427_01595	entF	enterobactin synthase subunit F	19.4474	956.822	-5.6206	3.9384e-215	2.1491e-213
K427_01670	ybdK	gamma-glutamyl ligase	278.67	817.865	-1.5533	1.059e-50	1.1767e-49
K427_01770	ompT	protease	320.311	149.718	1.0972	9.0939e-20	5.4466e-19
K427_01775	--	methyltransferase	98.8388	41.8349	1.2404	3.943e-08	1.5035e-07
K427_01825	cysS	cysteine--tRNA ligase	64.0622	31.3425	1.0314	9.6439e-05	0.00027002
K427_01920	cydB	cytochrome d ubiquinol oxidase subunit 2	6754.44	2709.45	1.3178	0	0
K427_01930	ybgE	hypothetical protein	440.656	209.04	1.0759	6.2736e-26	4.3765e-25
K427_02055	yfdE	CoA-transferase	3.4319	18.0253	-2.3929	0.0020928	0.0046932
K427_02105	lpxP	lipid A biosynthesis palmitoleoyl acyltransferase	102.499	356.74	-1.7993	7.5839e-29	5.5925e-28
K427_02185	yfeO	ion channel protein	21.049	50.3095	-1.2571	0.0020689	0.0046439
K427_02210	mntH	manganese transport protein MntH	319.853	751.414	-1.2322	1.4725e-31	1.1479e-30
K427_02275	gltX	glutamyl-tRNA ligase	230.166	110.708	1.0559	5.8008e-14	2.9189e-13
K427_02615	ybfA	hypothetical protein	153.52	398.978	-1.3779	4.1983e-21	2.61e-20
K427_02655	--	TonB-dependent receptor	17.8459	2.55583	2.8037	0.00016129	0.00043813
K427_02670	speF	ornithine decarboxylase	185.78	4.84262	5.2617	5.4931e-48	5.8647e-47
K427_02675	potE	putrescine transporter	257.164	18.5634	3.7922	2.6172e-58	3.2957e-57
K427_02900	#N/A	#N/A	332.208	9.68525	5.1002	5.4073e-84	8.8522e-83
K427_02925	tufB	hypothetical protein	2805.24	1346.79	1.0586	2.1165e-152	6.6631e-151
K427_03085	--	scaffolding protein	60.1727	29.0557	1.0503	0.00012981	0.00035815
K427_03475	mcbA	hypothetical protein	33.175	114.34	-1.7852	3.6036e-10	1.5257e-09
K427_03490	ybiO	mechanosensitive channel protein	36.8357	147.969	-2.0061	6.3704e-15	3.3212e-14
K427_03520	dps	DNA starvation/stationary phase protection protein Dps	4084.88	16998	-2.057	0	0
K427_03540	ompX	membrane protein	3046.38	8216.59	-1.4314	0	0
K427_03665	rimO	ribosomal protein S12 methylthiotransferase	32.0311	6.72587	2.2517	6.0429e-06	1.9122e-05
K427_03685	dacC	peptidase M15	220.328	480.361	-1.1245	1.0623e-17	6.0666e-17
K427_03780	potF	spermidine/putrescine ABC transporter substrate-binding protein	74.8155	316.519	-2.0809	1.115e-31	8.7199e-31
K427_03830	artP	arginine ABC transporter ATP-binding protein	24.2521	57.977	-1.2574	0.0009421	0.0022614
K427_03835	ybjP	lipoprotein	38.4373	92.5479	-1.2677	2.5511e-05	7.6118e-05
K427_03845	amiD	N-acetylmuramoyl-L-alanine amidase AmiD	128.582	275.088	-1.0972	2.453e-10	1.0512e-09
K427_03865	poxB	pyruvate dehydrogenase	132.7	528.653	-1.9942	9.6096e-49	1.035e-47
K427_03875	hcp	hydroxylamine reductase	34.7766	5.78424	2.5879	3.998e-07	1.3866e-06
K427_03895	aqpZ	porin	47.8178	157.251	-1.7174	9.9665e-13	4.7707e-12
K427_03975	cydC	amino acid ABC transporter permease	148.258	60.8018	1.2859	5.4657e-12	2.5181e-11
K427_04035	dmsA	dimethyl sulfoxide reductase	1461.07	308.717	2.2427	2.3373e-204	1.0629e-202
K427_04040	dmsB	dimethyl sulfoxide reductase	342.733	97.9286	1.8073	7.5465e-39	6.8634e-38
K427_04045	dmsC	dimethyl sulfoxide reductase	395.813	127.522	1.6341	1.4194e-39	1.3152e-38
K427_04080	focA	formate transporter	235.428	522.869	-1.1512	6.1223e-20	3.6758e-19
K427_04085	ycaO	hypothetical protein	63.6046	17.2182	1.8852	8.3969e-09	3.3528e-08
K427_04125	cmk	cytidylate kinase	75.7306	157.789	-1.059	3.6577e-06	1.1772e-05
K427_04130	rpsA	30S ribosomal protein S1	4444.77	1686.58	1.398	0	0
K427_04135	ihfB	integration host factor subunit beta	286.221	613.803	-1.1006	2.4158e-21	1.5172e-20
K427_04210	ldtD	murein L%2CD-transpeptidase	531.03	1739.04	-1.7114	9.8392e-124	2.4161e-122
K427_04235	ompF	porin	13322.4	481.168	4.7912	0	0
K427_04340	pqiA	paraquat-inducible membrane protein A	30.8871	114.878	-1.895	4.6284e-11	2.0552e-10
K427_04360	rmf	ribosome modulation factor	3215.92	10389.4	-1.6918	0	0
K427_04370	ycbZ	Lon protease	94.0341	201.776	-1.1015	5.2756e-08	2.0023e-07
K427_04425	yccT	hypothetical protein	7.32139	31.0735	-2.0855	0.0002378	0.00062789
K427_04440	hspQ	heat shock protein HspQ	493.965	1396.16	-1.499	2.192e-80	3.3433e-79
K427_04445	rlmI	23S rRNA methyltransferase	36.8357	15.0659	1.2898	0.00057608	0.0014338
K427_04660	#N/A	#N/A	61.7742	4.03552	3.9362	1.5102e-15	8.0796e-15
K427_04780	fis	Fis family transcriptional regulator	67.2653	13.3172	2.3366	2.2429e-11	1.0106e-10
K427_04785	dusB	tRNA-dihydrouridine synthase B	97.0084	31.0735	1.6424	6.266e-11	2.7575e-10
K427_04840	rbsB	sugar ABC transporter	39.1237	8.47459	2.2068	7.5766e-07	2.5804e-06
K427_04865	accC	acetyl-CoA carboxylase	383.915	169.492	1.1796	1.2374e-25	8.559e-25
K427_04980	yhcO	hypothetical protein	37.5221	81.9211	-1.1265	0.00039478	0.0010056
K427_04990	argR	arginine repressor	136.132	287.194	-1.077	2.1369e-10	9.1735e-10
K427_05030	rplM	50S ribosomal protein L13	574.5	196.664	1.5466	6.0381e-53	6.961e-52
K427_05035	rpsI	30S ribosomal protein S9	555.282	168.954	1.7166	3.5612e-58	4.4616e-57
K427_05070	nanA	N-acetylneuraminate lyase	174.798	23.137	2.9174	2.6915e-33	2.1669e-32
K427_05155	yrbL	hypothetical protein	42.098	106.269	-1.3359	2.2216e-06	7.2643e-06
K427_05255	murA	UDP-N-acetylglucosamine 1-carboxyvinyltransferase	101.127	40.6242	1.3158	7.4475e-09	2.9931e-08
K427_05275	rplU	50S ribosomal protein L21	133.387	55.9592	1.2532	1.3108e-10	5.707e-10
K427_05280	rpmA	50S ribosomal protein L27	123.777	47.4846	1.3822	3.9101e-11	1.7394e-10
K427_05395	infB	translation initiation factor IF-2	1703.37	813.157	1.0668	3.2446e-94	6.0359e-93
K427_05445	mtr	tryptophan permease	154.664	1051.93	-2.7658	8.6894e-146	2.5708e-144
K427_05460	yhbU	protease	26.3112	6.72587	1.9679	0.00014467	0.00039561
K427_05675	tdcA	transcriptional regulator	91.975	33.4948	1.4573	3.7148e-09	1.5204e-08
K427_05680	tdcB	threonine dehydratase	830.063	110.573	2.9082	6.4441e-151	2.0031e-149
K427_05685	tdcC	septum site-determining protein	1155.86	166.532	2.7951	4.8685e-202	2.1348e-200
K427_05690	tdcD	propionate kinase	327.632	37.2613	3.1363	1.2236e-64	1.6329e-63
K427_05695	tdcE	pyruvate formate-lyase	760.967	46.543	4.0312	1.0591e-174	4.0637e-173
K427_05700	tdcF	endoribonuclease L-PSP	215.066	16.5456	3.7003	2.4251e-48	2.6004e-47
K427_05705	tdcG	serine dehydratase	274.781	46.4085	2.5658	1.0726e-45	1.0975e-44
K427_05715	yhaO	membrane protein	57.8847	7.53297	2.9419	3.8078e-12	1.781e-11
K427_05720	yhaM	membrane protein	96.322	22.0608	2.1264	2.922e-14	1.4886e-13
K427_05755	yqjG	hypothetical protein	56.7408	211.999	-1.9016	3.0793e-19	1.822e-18
K427_05765	yqjK	membrane protein	137.962	332.527	-1.2692	1.3502e-15	7.255e-15
K427_05770	yqjE	membrane protein	120.345	243.88	-1.019	3.0394e-08	1.1717e-07
K427_05780	yqjC	hypothetical protein	269.29	672.587	-1.3206	4.741e-32	3.7676e-31
K427_05925	ebgA	beta-D-galactosidase	78.4761	15.335	2.3554	3.9823e-13	1.9326e-12
K427_05940	ygjH	methionyl-tRNA synthetase	17.3883	2.69035	2.6923	0.00025822	0.00067672
K427_05945	patA	putrescine--2-oxoglutarate aminotransferase	504.718	1787.87	-1.8247	1.6871e-140	4.7618e-139
K427_06050	plsY	glycerol-3-phosphate acyltransferase	16.0155	43.1801	-1.4309	0.0013455	0.0031288
K427_06070	cca	tRNA nucleotidyl transferase	97.466	211.865	-1.1202	1.4451e-08	5.7143e-08
K427_06170	dsbB	disulfide oxidoreductase	34.319	70.8906	-1.0466	0.0021618	0.0048304
K427_06220	cpdA	diguanylate phosphodiesterase	307.727	628.599	-1.0305	2.3693e-19	1.4053e-18
K427_06225	yqiA	esterase	29.9719	65.1064	-1.1192	0.0016942	0.0038664
K427_06300	ygiW	hypothetical protein	602.184	1422.79	-1.2404	6.2847e-59	7.955e-58
K427_06390	ygiQ	hypothetical protein	52.3937	15.7385	1.7351	6.6514e-07	2.2748e-06
K427_06410	dkgA	2%2C5-diketo-D-gluconic acid reductase	256.02	550.041	-1.1033	2.2584e-19	1.3428e-18
K427_06430	yghB	membrane protein	139.106	367.501	-1.4016	4.0951e-20	2.4768e-19
K427_06455	exbD	biopolymer transporter ExbD	34.0902	102.368	-1.5863	6.9929e-08	2.6137e-07
K427_06460	yghA	oxidoreductase	40.2676	119.989	-1.5752	6.5216e-09	2.6383e-08
K427_06475	ysgA	dienelactone hydrolase	47.8178	98.4667	-1.0421	0.00031912	0.00082401
K427_06490	hybO	hydrogenase 2 small subunit	261.968	46.0049	2.5095	1.0058e-42	9.724e-42
K427_06495	hybA	hydrogenase 2 protein HybA	165.646	20.5812	3.0087	1.855e-32	1.4789e-31
K427_06500	hybB	hydrogenase 2 b cytochrome subunit	200.423	30.939	2.6956	2.2194e-35	1.8728e-34
K427_06505	hybC	hydrogenase 2 large subunit	329.005	52.8653	2.6377	8.1916e-56	9.7175e-55
K427_06510	hybD	hydrogenase 2 maturation endopeptidase	57.4272	13.9898	2.0374	1.0143e-08	4.0302e-08
K427_06515	hybE	hydrogenase 2-specific chaperone	27.4552	7.66749	1.8403	0.00019139	0.00051475
K427_06635	glcD	glycolate oxidase	1814.56	787.733	1.2038	7.2561e-118	1.7133e-116
K427_06640	glcE	glycolate oxidase	1189.95	328.088	1.8588	7.7911e-135	2.0572e-133
K427_06650	glcG	hypothetical protein	627.58	164.784	1.9292	3.5256e-75	5.0926e-74
K427_06655	glcB	malate synthase	2468.68	873.017	1.4997	6.3426e-213	3.2448e-211
K427_06665	glcA	glycolate permease glcA	160.842	52.3272	1.62	7.1075e-17	3.9576e-16
K427_06805	trmI	tRNA (guanine-N7)-methyltransferase	26.7688	66.048	-1.303	0.0002651	0.00069401
K427_06825	ansB	L-asparaginase II	2451.06	144.606	4.0832	0	0
K427_06950	tktA	transketolase	1224.96	334.679	1.8719	6.6526e-140	1.8564e-138
K427_07025	--	membrane protein	29.0568	8.34007	1.8007	0.00015231	0.00041602
K427_07150	zapA	Z-ring-associated protein	448.435	1044.53	-1.2199	1.945e-42	1.8657e-41
K427_07185	gcvT	glycine cleavage system protein T	292.856	35.109	3.0603	7.729e-57	9.4424e-56
K427_07190	gcvH	glycine cleavage system protein H	310.93	21.3883	3.8617	7.3761e-71	1.035e-69
K427_07195	gcvP	glycine dehydrogenase	998.912	50.8475	4.2961	8.6681e-236	5.1915e-234
K427_07280	uacT	purine permease	29.9719	4.43907	2.7553	1.2336e-06	4.1159e-06
K427_07315	xdhD	hypoxanthine oxidase	240.004	58.246	2.0428	9.0314e-32	7.1082e-31
K427_07320	ygfM	oxidoreductase	59.2575	7.802	2.9251	2.413e-12	1.1329e-11
K427_07325	ssnA	chlorohydrolase	175.485	19.774	3.1497	1.4767e-35	1.2547e-34
K427_07330	ygfK	selenate reductase subunit YgfK	535.605	53.5379	3.3225	3.0028e-109	6.3023e-108
K427_07340	yqeC	hypothetical protein	83.2808	34.3019	1.2797	2.6149e-07	9.2791e-07
K427_07355	hyuA	phenylhydantoinase	44.1571	7.802	2.5007	1.9694e-08	7.7377e-08
K427_07360	ygeY	peptidase	168.621	18.6979	3.1728	1.9941e-34	1.6543e-33
K427_07365	ygeX	diaminopropionate ammonia-lyase	91.7462	8.34007	3.4595	1.0817e-20	6.691e-20
K427_07370	ygeW	ornithine carbamoyltransferase	134.302	10.2233	3.7155	6.5499e-31	5.0106e-30
K427_07385	xdhB	xanthine dehydrogenase	42.098	20.3121	1.0514	0.001359	0.0031512
K427_07390	xdhA	xanthine dehydrogenase	157.867	74.2536	1.0882	2.1318e-10	9.1678e-10
K427_07805	ygdI	hypothetical protein	752.959	1852.84	-1.2991	8.5028e-83	1.3736e-81
K427_07855	fucA	fuculose phosphate aldolase	52.8513	25.2893	1.0634	0.00029776	0.00077373
K427_07860	fucO	1%2C2-propanediol oxidoreductase	739.918	319.075	1.2135	1.2107e-49	1.3155e-48
K427_07870	sdaB	serine dehydratase	94.0341	26.0964	1.8493	4.3948e-12	2.0439e-11
K427_07875	sdaC	serine/threonine protein kinase	300.863	55.9592	2.4267	3.2528e-47	3.443e-46
K427_08235	nlpD	lipoprotein NlpD	423.725	209.174	1.0184	2.7091e-23	1.8127e-22
K427_08325	hypD	hydrogenase isoenzymes formation protein HypD	63.8334	31.3425	1.0262	0.0001049	0.00029273
K427_08495	srlE	PTS system glucitol/sorbitol-specific transporter subunit IIB	32.7175	13.0482	1.3262	0.00094899	0.0022757
K427_08500	srlA	PTS system glucitol/sorbitol-specific transporter subunit IIC	26.9976	7.66749	1.816	0.00024315	0.00064063
K427_08550	csrA	carbon storage regulator	1360.18	5448.09	-2.002	0	0
K427_08580	#N/A	#N/A	2.97431	17.2182	-2.5333	0.0018148	0.0041149
K427_08590	#N/A	#N/A	36.8357	124.159	-1.753	1.1879e-10	5.181e-10
K427_08605	cbpM	chaperone-modulator protein CbpM	144.14	469.331	-1.7031	1.95e-34	1.6287e-33
K427_08610	cbpA	DNA-binding protein	506.777	1996.64	-1.9782	7.0027e-177	2.7735e-175
K427_08645	ymdF	hypothetical protein	204.313	4503.24	-4.4621	0	0
K427_08705	putA	transcriptional regulator	642.91	124.025	2.374	1.2968e-96	2.4878e-95
K427_08730	--	iron permease	6.8638	43.8526	-2.6756	2.6464e-07	9.3769e-07
K427_08735	efeO	ferrous iron transporter	15.1004	83.9388	-2.4748	1.157e-11	5.2712e-11
K427_08740	efeB	peroxidase	21.5066	105.462	-2.2939	4.6295e-13	2.2422e-12
K427_08755	phoH	hypothetical protein	788.88	1950.37	-1.3059	7.183e-88	1.2599e-86
K427_09065	flgA	flagellar basal body P-ring biosynthesis protein FlgA	13.0412	2.01776	2.6923	0.0015539	0.0035761
K427_09075	flgB	flagellar basal body rod protein FlgB	22.8793	0	5.516	3.1099e-07	1.0956e-06
K427_09080	flgC	flagellar basal body rod protein FlgC	10.2957	0	4.6731	0.00071985	0.0017641
K427_09085	flgD	flagellar basal body rod modification protein	62.2318	3.0939	4.3302	2.4624e-16	1.3588e-15
K427_09090	flgE	flagellar hook protein FlgE	122.633	4.84262	4.6624	1.8647e-31	1.4444e-30
K427_09095	flgF	flagellar basal body rod protein FlgF	37.0645	2.01776	4.1992	3.3347e-10	1.4192e-09
K427_09100	flgG	flagellar basal body rod protein FlgG	71.3836	3.36293	4.4078	1.232e-18	7.1862e-18
K427_09120	flgK	flagellar hook protein FlgK	59.9439	24.2131	1.3078	9.3136e-06	2.866e-05
K427_09250	ycfH	DNAse	167.019	611.65	-1.8727	3.2652e-51	3.6779e-50
K427_09255	ptsG	PTS glucose-specific subunit IIBC	190.356	499.463	-1.3917	1.8981e-26	1.3394e-25
K427_09345	ycfT	membrane protein	13.9564	42.642	-1.6113	0.00042326	0.0010737
K427_09355	lolD	lipoprotein ABC transporter ATP-binding protein	28.828	9.2817	1.635	0.00038018	0.00097045
K427_09390	potD	spermidine/putrescine ABC transporter substrate-binding protein	242.75	105.462	1.2028	3.3873e-17	1.9166e-16
K427_09440	purB	adenylosuccinate lyase	118.057	37.2613	1.6637	3.5872e-13	1.7443e-12
K427_09450	mnmA	tRNA 2-thiouridylase	55.1392	24.8857	1.1478	9.9052e-05	0.00027671
K427_09665	borD	hypothetical protein	36.6069	5.11166	2.8403	5.4491e-08	2.0649e-07
K427_09850	znuB	iron ABC transporter permease	10.5245	41.7004	-1.9863	3.9826e-05	0.00011643
K427_09855	znuB	membrane protein	7.32139	44.6598	-2.6088	3.1319e-07	1.1018e-06
K427_09860	fhuC	manganese/iron transporter ATP-binding protein	12.3548	89.185	-2.8517	2.59e-14	1.3278e-13
K427_09865	znuA	iron ABC transporter substrate-binding protein	11.6685	86.7637	-2.8945	3.5629e-14	1.8077e-13
K427_09915	ariR	two-component-system connector protein AriR	71.6123	144.741	-1.0152	2.127e-05	6.3851e-05
K427_09985	ymgG	hypothetical protein	17.3883	2.15228	3.0142	0.00011994	0.00033354
K427_10075	ycgN	hypothetical protein	24.0233	61.878	-1.365	0.00023198	0.00061385
K427_10140	ycgB	SpoVR family protein	1193.39	3586.77	-1.5876	3.1484e-224	1.798e-222
K427_10150	dadX	alanine racemase	298.347	700.432	-1.2313	1.7231e-29	1.2979e-28
K427_10175	ymgE	hypothetical protein	44.3859	142.185	-1.6796	2.7406e-11	1.2303e-10
K427_10215	treA	trehalase	70.6972	237.154	-1.7461	7.057e-19	4.1359e-18
K427_10235	dhaL	dihydroxyacetone kinase	77.7898	36.5887	1.0882	8.2564e-06	2.5534e-05
K427_10280	prs	ribose-phosphate pyrophosphokinase	349.825	158.327	1.1437	1.3327e-22	8.7035e-22
K427_10315	ychA	hypothetical protein	70.926	148.642	-1.0675	5.9274e-06	1.8805e-05
K427_10350	chaB	cation transport regulator	21.7354	54.2105	-1.3185	0.00083758	0.0020284
K427_10355	chaC	transporter	64.0622	138.015	-1.1073	6.0837e-06	1.9202e-05
K427_10385	narK	nitrate/nitrite transporter NarK	433.106	22.7334	4.2518	6.7859e-103	1.3547e-101
K427_10395	narG	nitrate reductase	2505.75	271.994	3.2036	0	0
K427_10400	narH	nitrate reductase	777.211	149.583	2.3774	1.4443e-116	3.284e-115
K427_10405	narJ	nitrate reductase	158.325	31.6116	2.3244	1.3935e-24	9.5049e-24
K427_10410	narI	nitrate reductase	250.529	45.6014	2.4578	4.1347e-40	3.8459e-39
K427_10440	rssB	response regulator of RpoS	128.811	290.826	-1.1749	3.609e-12	1.6912e-11
K427_10490	oppA	peptide ABC transporter substrate-binding protein	4745.63	1563.23	1.6021	0	0
K427_10495	oppB	oligopeptide transporter permease	100.898	41.5659	1.2794	1.4529e-08	5.7358e-08
K427_10570	ompW	membrane protein	1241.43	284.908	2.1234	8.0131e-164	2.7329e-162
K427_10585	yciG	hypothetical protein	12.5836	140.167	-3.4775	4.6975e-26	3.3052e-25
K427_10610	trpD	glutamine amidotransferase	7.55018	71.2942	-3.2392	3.2478e-13	1.5856e-12
K427_10615	trpE	anthranilate synthase component I	26.7688	211.999	-2.9854	2.0683e-33	1.6818e-32
K427_10745	osmB	lipoprotein	701.709	1503.63	-1.0995	8.6288e-50	9.4173e-49
K427_10765	gmr	RNase II stability modulator	174.341	585.957	-1.7489	2.4497e-44	2.4158e-43
K427_10850	sapB	peptide ABC transporter permease	27.684	78.4236	-1.5022	6.5886e-06	2.0663e-05
K427_10855	sapA	peptide ABC transporter substrate-binding protein	59.9439	143.53	-1.2597	1.8617e-07	6.6643e-07
K427_10985	ycjX	hypothetical protein	31.1159	77.3475	-1.3137	6.9949e-05	0.00020066
K427_11010	mpaA	murein peptide amidase A	39.1237	84.7459	-1.1151	0.00035855	0.00091905
K427_11260	gadB	glutamate decarboxylase	1449.86	3765.95	-1.3771	1.1839e-184	4.8451e-183
K427_11410	marC	hypothetical protein	14.8716	42.2384	-1.506	0.0009185	0.0022178
K427_11515	ydfZ	hypothetical protein	69.782	20.0431	1.7998	4.4308e-09	1.8074e-08
K427_11570	ynfD	membrane protein	167.248	411.623	-1.2993	1.0569e-19	6.3144e-19
K427_11575	ynfE	dimethyl sulfoxide reductase	176.171	50.9821	1.7889	1.5649e-20	9.5883e-20
K427_11580	ynfF	dimethyl sulfoxide reductase	193.33	57.7079	1.7442	9.633e-22	6.1601e-21
K427_11585	ynfG	dimethyl sulfoxide reductase	23.5657	8.07104	1.5459	0.0019323	0.0043651
K427_11625	ynfM	membrane protein	8.69415	85.1495	-3.2919	1.036e-15	5.6035e-15
K427_11670	pntB	pyridine nucleotide transhydrogenase	701.023	295.669	1.2455	9.5544e-49	1.0336e-47
K427_11745	ydgA	hypothetical protein	899.158	2347.87	-1.3847	6.7237e-117	1.543e-115
K427_11945	sodC	superoxide dismutase	344.334	1298.23	-1.9147	3.0392e-110	6.4337e-109
K427_12005	sodB	superoxide dismutase	3473.31	957.36	1.8592	0	0
K427_12045	cfa	cyclopropane fatty acyl phospholipid synthase	623.92	1704.6	-1.45	2.1062e-92	3.831e-91
K427_12085	ydhS	hypothetical protein	200.194	601.158	-1.5863	5.0827e-39	4.6697e-38
K427_12090	ydhT	hypothetical protein	21.7354	5.51521	1.9786	0.0005307	0.0013298
K427_12095	ydhU	thiosulfate reductase cytochrome B subunit	35.0054	10.3578	1.7569	4.2267e-05	0.00012298
K427_12100	ydhX	ferredoxin	53.5377	12.9137	2.0517	2.8048e-08	1.0846e-07
K427_12105	ydhW	hypothetical protein	90.831	24.8857	1.8679	7.6064e-12	3.4848e-11
K427_12110	ydhV	oxidoreductase	378.882	25.2893	3.9052	1.7694e-86	2.9965e-85
K427_12115	ydhY	hypothetical protein	70.0108	3.22842	4.4387	2.3567e-18	1.3681e-17
K427_12155	ldtE	murein L%2CD-transpeptidase	311.617	663.439	-1.0902	1.5129e-22	9.8283e-22
K427_12165	sufE	cysteine desufuration protein SufE	10.2957	38.3374	-1.8967	0.00014175	0.00038892
K427_12170	sufS	cysteine sulfinate desulfinase	87.8567	341.27	-1.9577	2.9717e-31	2.2804e-30
K427_12175	sufD	cysteine desulfurase	135.446	459.915	-1.7637	1.2799e-35	1.0951e-34
K427_12180	sufC	cysteine desulfurase	46.9027	195.723	-2.0611	5.9311e-20	3.5697e-19
K427_12185	sufB	cysteine desulfurase	162.215	496.772	-1.6147	1.8446e-33	1.5049e-32
K427_12190	sufA	iron-sulfur cluster assembly scaffold protein	56.0544	168.685	-1.5894	4.1442e-12	1.9347e-11
K427_12215	ydiK	hypothetical protein	63.6046	140.974	-1.1482	2.1923e-06	7.178e-06
K427_12325	ydiU	hypothetical protein	105.703	232.849	-1.1394	1.5376e-09	6.3779e-09
K427_12465	yniB	membrane protein	78.0186	192.091	-1.2999	5.4058e-10	2.273e-09
K427_12490	katE	hydroperoxidase	147.114	343.692	-1.2242	3.9825e-15	2.0896e-14
K427_12560	astE	succinylglutamate desuccinylase	138.191	880.954	-2.6724	1.2585e-117	2.9431e-116
K427_12565	astB	succinylarginine dihydrolase	92.8901	624.026	-2.748	1.2575e-86	2.1444e-85
K427_12570	astD	succinylglutamate-semialdehyde dehydrogenase	173.654	1327.42	-2.9343	5.7526e-196	2.4782e-194
K427_12575	astA	arginine succinyltransferase	67.2653	253.431	-1.9137	6.8486e-23	4.5452e-22
K427_12580	astC	acetylornithine aminotransferase	165.189	566.856	-1.7789	4.5119e-44	4.4317e-43
K427_12640	ynjE	thiosulfate sulfurtransferase	53.3089	21.9263	1.2817	3.7222e-05	0.00010946
K427_12765	yeaD	glucose-6-phosphate 1-epimerase	243.436	71.6977	1.7635	2.6504e-27	1.9086e-26
K427_12775	mipA	MltA-interacting protein MipA	83.052	34.1674	1.2814	2.6501e-07	9.3769e-07
K427_12785	yeaG	serine/threonine protein kinase	2147.23	6700.58	-1.6418	0	0
K427_12790	yeaH	hypothetical protein	317.565	1084.61	-1.7721	3.3447e-82	5.3333e-81
K427_12925	yeaY	membrane protein	169.994	442.293	-1.3795	2.8808e-23	1.9223e-22
K427_12940	yoaB	endoribonuclease L-PSP	35.6918	14.7969	1.2703	0.00079555	0.0019381
K427_12975	sdaA	serine dehydratase	800.091	2101.97	-1.3935	5.245e-106	1.0733e-104
K427_12985	yoaD	c-di-GMP phosphodiesterase	16.2443	46.0049	-1.5019	0.00055884	0.0013946
K427_13110	yebS	membrane protein	27.4552	69.2764	-1.3353	0.00013392	0.00036827
K427_13125	yebV	hypothetical protein	162.215	475.788	-1.5524	3.4945e-30	2.6485e-29
K427_13130	yebW	hypothetical protein	47.589	98.7357	-1.0529	0.00027107	0.00070737
K427_13135	pphA	serine/threonine protein phosphatase	7.32139	45.4669	-2.6346	2.0757e-07	7.3977e-07
K427_13145	yebY	hypothetical protein	56.7408	27.9796	1.02	0.00027063	0.00070699
K427_13200	yebF	hypothetical protein	132.014	314.502	-1.2524	1.6512e-14	8.5721e-14
K427_13340	yegP	hypothetical protein	824.114	3976.33	-2.2705	0	0
K427_13370	yegS	lipid kinase	19.6762	48.4262	-1.2993	0.0018391	0.0041661
K427_13525	metG	methionine--tRNA ligase	193.33	71.4287	1.4365	2.4696e-17	1.4038e-16
K427_13625	mlrA	MerR family transcriptional regulator	51.2497	136.401	-1.4122	1.769e-08	6.9726e-08
K427_13650	osmF	osmoprotectant uptake system substrate-binding protein	22.193	110.17	-2.3116	1.0546e-13	5.2315e-13
K427_13690	yohC	membrane protein	103.415	520.178	-2.3306	2.477e-59	3.1516e-58
K427_13705	yohF	oxidoreductase	18.3035	72.5048	-1.986	6.0678e-08	2.2959e-07
K427_13770	preA	dihydropyrimidine dehydrogenase	709.488	269.169	1.3983	3.1986e-57	3.947e-56
K427_13785	mglA	sugar ABC transporter ATP-binding protein	84.4248	34.1674	1.305	1.497e-07	5.4139e-07
K427_13790	mglB	sugar ABC transporter substrate-binding protein	837.155	272.263	1.6205	7.0677e-81	1.0915e-79
K427_13900	psuG	pseudouridine-5'-phosphate glycosidase	435.851	181.867	1.2609	1.9168e-31	1.4801e-30
K427_13905	psuK	pseudouridine kinase	219.87	95.3728	1.205	9.3381e-16	5.0619e-15
K427_14055	rplY	50S ribosomal protein L25	176.4	45.3323	1.9602	9.4858e-23	6.2281e-22
K427_14125	dsbE	thiol:disulfide interchange protein DsbE	27.2264	9.01266	1.595	0.00067463	0.0016616
K427_14130	ccmF	cytochrome C biogenesis protein CcmF	51.4785	13.7208	1.9076	1.8012e-07	6.4665e-07
K427_14145	ccmC	heme ABC transporter permease	28.1416	7.26394	1.9539	9.0942e-05	0.00025551
K427_14160	napC	cytochrome C	74.3579	27.8451	1.4171	1.9332e-07	6.9e-07
K427_14165	napB	nitrate reductase	32.4887	3.0939	3.3924	3.5606e-08	1.364e-07
K427_14170	napH	quinol dehydrogenase	111.88	13.7208	3.0275	1.4429e-22	9.3984e-22
K427_14175	napG	quinol dehydrogenase	131.785	13.8553	3.2497	9.1928e-28	6.6786e-27
K427_14180	napA	nitrate reductase	2068.75	177.294	3.5445	0	0
K427_14185	napD	nitrate reductase	14.414	0	4.4216	7.4294e-05	0.00021238
K427_14190	napF	ferredoxin	343.419	44.9288	2.9343	4.8467e-64	6.3987e-63
K427_14200	eco	ecotin	531.945	248.723	1.0967	9.6722e-32	7.5882e-31
K427_14295	atoD	acetyl-CoA:acetoacetyl-CoA transferase subunit alpha	671.738	1.61421	8.7009	3.5237e-137	9.6143e-136
K427_14300	atoA	acetate CoA-transferase	268.832	0	8.9647	2.7466e-54	3.227e-53
K427_14305	atoE	short-chain fatty acid transporter	528.742	3.36293	7.2967	1.4376e-124	3.5657e-123
K427_14310	atoB	acetyl-CoA acetyltransferase	547.274	3.49745	7.2898	6.2054e-129	1.6211e-127
K427_14340	gyrA	DNA gyrase subunit A	415.031	195.319	1.0874	7.4826e-25	5.1469e-24
K427_14365	nrdA	ribonucleotide-diphosphate reductase subunit alpha	229.022	40.2207	2.5095	1.4417e-37	1.292e-36
K427_14375	nrdB	ribonucleotide-diphosphate reductase subunit beta	167.706	74.119	1.178	4.8255e-12	2.2357e-11
K427_14385	inaA	hypothetical protein	17.8459	159.269	-3.1578	5.9374e-27	4.2384e-26
K427_14390	glpQ	glycerophosphodiester phosphodiesterase	350.283	2847.19	-3.0229	0	0
K427_14395	glpT	sn-glycerol-3-phosphate transporter	296.059	1452.92	-2.295	4.4035e-159	1.4612e-157
K427_14405	glpA	glycerol-3-phosphate dehydrogenase	277.984	3306.57	-3.5723	0	0
K427_14410	glpB	glycerol-3-phosphate dehydrogenase	65.4349	729.487	-3.4788	3.1388e-128	8.0288e-127
K427_14415	glpC	glycerol-3-phosphate dehydrogenase	86.9415	934.357	-3.4259	1.7774e-161	5.9789e-160
K427_14560	menF	isochorismate synthase	35.6918	75.1952	-1.075	0.0011797	0.0027695
K427_14565	elaB	protein ElaB	521.191	2017.36	-1.9526	2.6479e-175	1.0321e-173
K427_14725	yfbV	hypothetical protein	257.164	604.117	-1.2321	1.0809e-25	7.5191e-25
K427_14745	pta	phosphate acetyltransferase	949.95	392.118	1.2766	1.4586e-67	1.9788e-66
K427_14805	hisQ	amino acid ABC transporter permease	42.3268	85.6875	-1.0175	0.0010441	0.0024707
K427_14815	argT	hypothetical protein	401.532	819.211	-1.0287	1.168e-24	7.9892e-24
K427_14905	fabB	3-oxoacyl-ACP synthase	572.899	225.047	1.3481	1.9517e-44	1.9404e-43
K427_14945	prmB	SAM-dependent methyltransferase	52.1649	23.5405	1.1479	0.00015258	0.00041631
K427_14995	sixA	phosphohistidine phosphatase	347.766	898.576	-1.3695	5.4907e-45	5.5032e-44
K427_15040	yfdC	membrane protein	28.3704	85.9566	-1.5992	6.5681e-07	2.2495e-06
K427_15090	cutC	copper homeostasis protein CutC	103.415	334.007	-1.6914	1.0001e-24	6.8601e-24
K427_15170	cheA	chemotaxis protein CheA	34.5478	10.8959	1.6648	8.3401e-05	0.00023622
K427_15205	otsA	trehalose-6-phosphate synthase	64.5197	234.733	-1.8632	1.5658e-20	9.5883e-20
K427_15210	otsB	trehalose phosphatase	50.7921	218.86	-2.1073	8.6257e-23	5.6939e-22
K427_15280	ftnA	ferritin	660.069	164.515	2.0044	1.6689e-82	2.6785e-81
K427_15390	fliC	flagellin	544.3	48.0227	3.5026	2.8464e-115	6.2968e-114
K427_15395	fliD	flagellar capping protein	30.4295	6.59135	2.2068	1.2892e-05	3.9229e-05
K427_15410	amyA	cytoplasmic alpha-amylase	106.618	238.634	-1.1624	4.5782e-10	1.9316e-09
K427_15450	ompN	porin	1979.98	209.174	3.2427	0	0
K427_15490	fliF	flagellar MS-ring protein	20.5914	1.74873	3.5577	8.106e-06	2.5133e-05
K427_15495	fliG	flagellar motor switch protein G	14.6428	2.42131	2.5963	0.00098597	0.0023575
K427_15525	fliM	flagellar motor switch protein FliM	9.83812	0	4.1925	0.0012145	0.0028404
K427_15575	yodD	hypothetical protein	611.336	2167.61	-1.8261	3.8511e-170	1.4328e-168
K427_15590	yedP	mannosyl-3-phosphoglycerate phosphatase	243.436	721.551	-1.5676	1.3213e-45	1.3408e-44
K427_16000	soxS	AraC family transcriptional regulator	19.905	51.5201	-1.372	0.00073942	0.0018067
K427_16205	ldtA	L%2CD-transpeptidase	119.43	529.864	-2.1495	3.0676e-54	3.587e-53
K427_16375	plaP	putrescine/spermidine ABC transporter	66.5789	5.78424	3.5249	1.2593e-15	6.7817e-15
K427_16545	rfbA	glucose-1-phosphate thymidylyltransferase	43.0132	17.7563	1.2764	0.00022051	0.00058601
K427_16565	wcaN	UTP--glucose-1-phosphate uridylyltransferase	124.235	308.852	-1.3138	1.9052e-15	1.0126e-14
K427_16800	gmhB	D%2CD-heptose 1%2C7-bisphosphate phosphatase	1.83035	16.9492	-3.211	0.00040603	0.0010319
K427_16885	ldcC	lysine decarboxylase LdcC	92.4325	185.768	-1.007	1.7778e-06	5.8676e-06
K427_16970	tsf	elongation factor Ts	865.297	222.626	1.9586	9.3191e-105	1.8912e-103
K427_16975	rpsB	30S ribosomal protein S2	2880.51	1028.65	1.4856	3.6169e-245	2.3373e-243
K427_17045	clcA	chloride channel protein	51.9361	124.967	-1.2667	1.0135e-06	3.4091e-06
K427_17070	fhuA	ferrichrome transporter	47.589	125.101	-1.3944	9.5731e-08	3.5138e-07
K427_17245	gcd	glucose dehydrogenase	196.076	516.547	-1.3975	1.7378e-27	1.2551e-26
K427_17265	speD	S-adenosylmethionine decarboxylase	77.3322	30.2664	1.3534	2.6004e-07	9.2411e-07
K427_17270	yacL	hypothetical protein	43.4708	20.3121	1.0977	0.00079998	0.0019469
K427_17300	lpd	dihydrolipoamide dehydrogenase	3196.93	1266.21	1.3362	6.3682e-237	3.9095e-235
K427_17310	aceF	pyruvate dehydrogenase	3628.66	1258.14	1.5281	0	0
K427_17315	aceE	pyruvate dehydrogenase	4229.48	1205.95	1.8103	0	0
K427_17375	guaC	guanosine 5'-monophosphate oxidoreductase	146.428	61.2054	1.2585	1.4598e-11	6.6139e-11
K427_17570	leuA	2-isopropylmalate synthase	46.6739	93.355	-1.0001	0.00077129	0.0018808
K427_17610	thiB	thiamine ABC transporter substrate-binding protein	107.075	38.2029	1.4869	1.1517e-10	5.0323e-10
K427_17660	araB	ribulokinase	30.2007	64.5683	-1.0962	0.002185	0.0048778
K427_17750	folA	dihydrofolate reductase	60.1727	126.312	-1.0698	2.8643e-05	8.4844e-05
K427_17840	caiF	transcriptional regulator	39.5813	15.0659	1.3935	0.00017234	0.00046558
K427_17850	carB	carbamoyl phosphate synthase large subunit	468.798	76.6749	2.6121	5.0864e-78	7.616e-77
K427_17855	carA	carbamoyl phosphate synthase small subunit	34.7766	3.0939	3.4906	8.36e-09	3.3435e-08
K427_17930	nhaA	pH-dependent sodium/proton antiporter	271.578	825.533	-1.604	6.9855e-54	8.1296e-53
K427_18220	yjjI	hypothetical protein	222.616	75.8678	1.553	1.2004e-21	7.6365e-21
K427_18255	osmY	hypothetical protein	2566.38	5610.18	-1.1283	2.6119e-190	1.0871e-188
K427_18310	fusA	elongation factor G	6565.23	2776.44	1.2416	0	0
K427_18315	rpsG	30S ribosomal protein S7	564.205	139.763	2.0132	3.8319e-71	5.4391e-70
K427_18320	rpsL	30S ribosomal protein S12	456.672	119.451	1.9347	2.2131e-55	2.6127e-54
K427_18425	fic	cell filamentation protein Fic	148.487	311.139	-1.0672	5.6985e-11	2.5213e-10
K427_18455	nirB	nitrite reductase	314.82	39.4136	2.9978	6.1965e-60	7.925e-59
K427_18520	yhfZ	hypothetical protein	116.456	50.0404	1.2186	3.8104e-09	1.5569e-08
K427_18600	mrcA	penicillin-binding protein 1A	43.0132	16.0076	1.426	7.0209e-05	0.00020117
K427_18645	yhgE	membrane protein	35.6918	78.02	-1.1283	0.00053347	0.001334
K427_18680	yhgF	transcription accessory protein	104.559	44.7943	1.2229	2.1881e-08	8.5286e-08
K427_18695	feoB	ferrous iron transporter B	494.651	1268.77	-1.3589	5.8859e-62	7.607e-61
K427_18700	feoC	ferrous iron transporter C	19.905	50.5785	-1.3454	0.0010181	0.0024249
K427_18750	malP	maltose phosphorylase	254.19	111.38	1.1904	1.0462e-17	5.9883e-17
K427_18790	yihW	transcriptional regulator	23.3369	1.88324	3.6313	1.7242e-06	5.7138e-06
K427_18800	glpE	thiosulfate sulfurtransferase	2.74552	18.0253	-2.7149	0.00087282	0.0021095
K427_18805	glpD	glycerol-3-phosphate dehydrogenase	626.208	16032.4	-4.6782	0	0
K427_18985	yhhA	hypothetical protein	458.273	1351.76	-1.5606	2.9124e-83	4.7362e-82
K427_18990	ugpQ	glycerophosphodiester phosphodiesterase	34.319	103.578	-1.5936	5.2107e-08	1.9807e-07
K427_18995	ugpC	glycerol-3-phosphate transporter ATP-binding subunit	36.3782	98.1976	-1.4326	1.2981e-06	4.3192e-06
K427_19000	ugpE	glycerol-3-phosphate transporter membrane protein	6.17742	25.6928	-2.0563	0.00094013	0.002261
K427_19005	ugpA	glycerol-3-phosphate transporter permease	9.83812	43.1801	-2.1339	1.0635e-05	3.2562e-05
K427_19010	ugpB	glycerol-3-phosphate ABC transporter substrate-binding protein	218.498	967.583	-2.1468	2.3148e-97	4.5112e-96
K427_19085	rpoH	RNA polymerase factor sigma-32	771.263	1559.73	-1.016	2.2694e-44	2.247e-43
K427_19170	nikA	nickel ABC transporter substrate-binding protein	211.863	24.0786	3.1373	1.9342e-42	1.8626e-41
K427_19175	nikB	nickel transporter permease NikB	29.7431	2.42131	3.6187	6.895e-08	2.581e-07
K427_19180	nikC	nickel transporter permease NikC	32.0311	5.78424	2.4693	2.0221e-06	6.6296e-06
K427_19185	nikD	nickel ABC transporter ATP-binding protein	20.3626	5.51521	1.8844	0.0011203	0.0026377
K427_19190	nikE	nickel ABC transporter ATP-binding protein	20.3626	5.11166	1.9941	0.00075481	0.0018425
K427_19220	sgcC	PTS system galactitol-specific transporter subunit IIC	75.5018	34.9745	1.1102	8.4646e-06	2.6113e-05
K427_19265	yhiM	membrane protein	25.3961	113.802	-2.1638	5.1948e-13	2.5062e-12
K427_19280	uspB	universal stress protein UspB	448.664	1514.13	-1.7548	2.7106e-112	5.8904e-111
K427_19315	prlC	oligopeptidase A	331.75	773.878	-1.222	5.5928e-32	4.4302e-31
K427_19320	rlmJ	hypothetical protein	91.975	184.827	-1.0069	1.8958e-06	6.2403e-06
K427_19380	dctR	LuxR family transcriptional regulator	24.0233	71.2942	-1.5693	8.2374e-06	2.5508e-05
K427_19415	hemN	coproporphyrinogen III oxidase	2.74552	17.2182	-2.6488	0.0013473	0.0031301
K427_19425	--	hypothetical protein	5.71984	31.6116	-2.4664	3.2518e-05	9.5974e-05
K427_19445	hdeB	acid-resistance protein	1068.24	2990.72	-1.4853	1.7384e-167	6.0983e-166
K427_19450	hdeA	acid-resistance protein	2127.32	8302.41	-1.9645	0	0
K427_19460	hdeD	acid-resistance membrane protein	188.983	1009.69	-2.4176	6.2092e-119	1.4803e-117
K427_19465	gadE	LuxR family transcriptional regulator	264.714	874.094	-1.7234	8.5461e-64	1.1222e-62
K427_19480	mdtF	multidrug transporter	365.841	908.665	-1.3125	2.9662e-42	2.8342e-41
K427_19490	gadW	AraC family transcriptional regulator	10.9821	84.4769	-2.9434	4.528e-14	2.2831e-13
K427_19505	gadX	transcriptional regulator	48.9618	277.778	-2.5042	1.6365e-35	1.3857e-34
K427_19515	gadB	glutamate decarboxylase	35.6918	179.312	-2.3288	1.5509e-21	9.8152e-21
K427_19520	--	-	15.1004	1.61421	3.2257	0.00022798	0.0006039
K427_19845	talA	transaldolase	123.777	474.712	-1.9393	3.1322e-42	2.9811e-41
K427_19850	tktB	transketolase	303.38	770.919	-1.3455	1.1099e-37	9.9831e-37
K427_19860	ypfG	hypothetical protein	76.8746	165.86	-1.1094	6.7631e-07	2.3066e-06
K427_19870	aegA	(Fe-S)-binding protein	276.154	87.3017	1.6614	1.1212e-28	8.2428e-28
K427_19910	ypfN	hypothetical protein	43.0132	117.972	-1.4556	7.4861e-08	2.7811e-07
K427_19915	ypfH	hydrolase	75.7306	151.736	-1.0026	1.7214e-05	5.1867e-05
K427_19925	ypfJ	hypothetical protein	96.0932	222.626	-1.2121	3.7586e-10	1.5886e-09
K427_19990	uraA	uracil transporter	32.7175	4.03552	3.0192	1.2937e-07	4.7064e-07
K427_19995	upp	uracil phosphoribosyltransferase	117.6	22.4644	2.3882	3.6333e-19	2.1447e-18
K427_20075	guaA	GMP synthase	361.265	143.126	1.3358	2.5411e-28	1.8516e-27
K427_20080	guaB	inosine-5-monophosphate dehydrogenase	108.448	53.6724	1.0148	5.2469e-07	1.8096e-06
K427_20140	rodZ	cytoskeletal protein RodZ	349.368	732.447	-1.068	8.2669e-24	5.5617e-23
K427_20260	suhB	inositol monophosphatase	19.4474	2.82486	2.7833	8.6594e-05	0.00024441
K427_20270	csiE	stationary phase inducible protein CsiE	955.67	2691.96	-1.4941	1.8823e-152	6.0029e-151
K427_20290	yphA	membrane protein	21.049	71.8323	-1.7709	7.8722e-07	2.6737e-06
K427_20335	glyA	serine hydroxymethyltransferase	655.493	314.232	1.0607	4.5994e-37	4.0773e-36
K427_20345	hmp	dihydropteridine reductase	179.145	37.6649	2.2498	1.056e-26	7.4945e-26
K427_20385	purL	phosphoribosylformylglycinamidine synthase	110.965	47.4846	1.2246	7.9004e-09	3.17e-08
K427_20410	pgpC	hypothetical protein	49.1906	100.215	-1.0267	0.00034708	0.00089058
K427_20465	rnc	ribonuclease III	56.2832	143.395	-1.3492	2.9175e-08	1.1264e-07
K427_20495	rseA	anti-RNA polymerase sigma factor SigE	727.106	2126.32	-1.5481	3.3383e-128	8.4509e-127
K427_20500	rpoE	RNA polymerase sigma factor RpoE	438.368	1216.44	-1.4725	3.3381e-68	4.5794e-67
K427_20595	kgtP	alpha-ketoglutarate transporter	32.4887	71.9668	-1.1474	0.00072338	0.001771
K427_20685	yaiA	hypothetical protein	33.6326	94.7002	-1.4935	8.3269e-07	2.8242e-06
K427_20690	aroL	shikimate kinase	33.175	71.8323	-1.1145	0.0010232	0.0024346
K427_20695	yaiI	hypothetical protein	20.5914	59.1876	-1.5233	7.4416e-05	0.00021248
K427_20710	psiF	hypothetical protein	31.8023	117.568	-1.8863	3.2305e-11	1.4476e-10
K427_20945	prpD	2-methylcitrate dehydratase	1417.15	369.654	1.9387	2.4344e-168	8.7911e-167
K427_20950	prpC	methylcitrate synthase	539.953	223.299	1.2739	4.6783e-39	4.3188e-38
K427_20955	prpB	2-methylisocitrate lyase	195.39	94.2966	1.0511	5.2086e-12	2.4042e-11
K427_21150	ypjA	autotransporter	198.593	58.9186	1.753	2.0284e-22	1.3143e-21
K427_21165	ykgG	hypothetical protein	85.7975	6.9949	3.6166	5.2217e-20	3.1504e-19
K427_21170	ykgF	amino acid dehydrogenase	253.046	27.9796	3.1769	7.6215e-51	8.507e-50
K427_21175	ykgE	hypothetical protein	74.8155	8.20556	3.1887	3.1703e-16	1.7455e-15
K427_22065	ahr	alcohol dehydrogenase	33.8614	79.9033	-1.2386	0.0001287	0.00035551
K427_22205	pyrB	aspartate carbamoyltransferase catalytic subunit	145.741	7.93652	4.1988	1.2737e-35	1.0936e-34
K427_22210	pyrI	aspartate carbamoyltransferase regulatory subunit	126.294	9.14718	3.7873	1.7047e-29	1.288e-28
K427_22230	mgtA	magnesium ABC transporter ATPase	88.5431	28.7867	1.621	5.8657e-10	2.458e-09
K427_22245	treB	PTS system trehalose(maltose)-specific transporter subunits IIBC	94.2629	638.554	-2.76	4.8294e-89	8.5934e-88
K427_22250	treC	trehalose-6-phosphate hydrolase	22.4218	101.157	-2.1736	8.5665e-12	3.9173e-11
K427_22395	ytfK	hypothetical protein	1026.82	2359.57	-1.2003	6.5303e-91	1.1791e-89
K427_22405	cysQ	adenosine-3'(2')%2C5'-bisphosphate nucleotidase	484.356	1268.77	-1.3893	2.2871e-64	3.0358e-63
K427_22410	cpdB	2'%2C 3'-cyclic nucleotide 2'-phosphodiesterase	220.328	99.6773	1.1443	8.0831e-15	4.2052e-14
K427_22465	fklB	peptidylprolyl isomerase	35.463	13.8553	1.3559	0.00047945	0.0012088
K427_22540	rplI	50S ribosomal protein L9	917.69	275.357	1.7367	2.7201e-96	5.1779e-95
K427_22545	rpsR	30S ribosomal protein S18	106.847	19.6395	2.4437	6.0627e-18	3.4947e-17
K427_22550	priB	primosomal replication protein N	213.235	49.7714	2.0991	2.9574e-29	2.2208e-28
K427_22555	rpsF	30S ribosomal protein S6	990.447	277.509	1.8355	6.8735e-111	1.4677e-109
K427_22615	bsmA	biofilm stress and motility protein A	2935.65	7764.47	-1.4032	0	0
K427_22625	yjfN	hypothetical protein	881.084	2318.14	-1.3956	4.9728e-117	1.152e-115
K427_22630	aidB	isovaleryl-CoA dehydrogenase	154.436	593.759	-1.9429	1.6068e-52	1.8351e-51
K427_22815	brnQ	branched-chain amino acid ABC transporter substrate-binding protein	175.256	447.539	-1.3526	9.1482e-23	6.0226e-22
K427_22875	tsx	nucleoside-specific channel-forming protein Tsx	228.565	110.304	1.0511	8.467e-14	4.2174e-13
K427_22880	yajI	hypothetical protein	100.669	230.428	-1.1947	3.2496e-10	1.3878e-09
K427_22945	thiI	tRNA s(4)U8 sulfurtransferase	32.7175	14.1243	1.2119	0.0018623	0.0042148
K427_22980	cyoE	protoheme IX farnesyltransferase	602.413	222.761	1.4353	1.7168e-50	1.8905e-49
K427_22985	cyoD	cytochrome o ubiquinol oxidase subunit IV	147.114	47.2156	1.6396	8.8517e-16	4.8089e-15
K427_22990	cyoC	cytochrome o ubiquinol oxidase subunit III	283.246	135.055	1.0685	4.3822e-17	2.4681e-16
K427_23030	bolA	transcriptional regulator BolA	564.433	1873.42	-1.7308	1.5423e-135	4.1167e-134
K427_23040	tig	trigger factor	748.841	205.677	1.8643	7.472e-86	1.2482e-84
K427_23050	clpX	Clp protease ClpX	1188.58	2474.18	-1.0577	5.1725e-75	7.4278e-74
K427_23155	ybaY	hypothetical protein	409.998	1533.09	-1.9028	1.2114e-128	3.1313e-127
K427_23160	ybaZ	cysteine methyltransferase	103.186	230.159	-1.1574	1.0857e-09	4.5111e-09
K427_23165	ybaA	hypothetical protein	3.20311	123.756	-5.2719	4.2617e-29	3.1809e-28
K427_23170	ylaB	hypothetical protein	48.733	117.03	-1.2639	2.3414e-06	7.6456e-06
K427_23175	ylaC	membrane protein	434.25	35.6471	3.6067	3.4871e-94	6.4383e-93
K427_23280	adk	adenylate kinase	46.6739	13.0482	1.8388	1.1671e-06	3.9046e-06
K427_23360	glsA	glutaminase	58.1135	186.306	-1.6807	2.3885e-14	1.227e-13
K427_23365	ybaT	amino acid permease	201.109	798.36	-1.9891	1.9977e-72	2.852e-71
K427_23445	allR	transcriptional regulator	224.446	1184.02	-2.3993	8.8022e-138	2.4286e-136
K427_23475	allB	allantoinase	2360.69	61.878	5.2536	0	0
K427_23495	allE	hypothetical protein	88.5431	22.0608	2.0049	1.8254e-12	8.6201e-12
K427_23500	allC	allantoate amidohydrolase	24.2521	8.20556	1.5634	0.0015344	0.003538
K427_23550	murI	glutamate racemase	2.97431	55.1521	-4.2128	1.0737e-12	5.1097e-12
K427_23555	btuB	vitamin B12/cobalamin outer membrane transporter	265.858	56.2282	2.2413	1.1627e-38	1.0535e-37
K427_23610	argH	argininosuccinate lyase	55.368	140.436	-1.3428	4.6221e-08	1.7597e-07
K427_23615	argB	acetylglutamate kinase	16.0155	45.7359	-1.5139	0.00053178	0.0013311
K427_23645	eptC	hypothetical protein	214.151	86.3601	1.3102	4.9251e-17	2.7612e-16
K427_23845	hslV	ATP-dependent protease subunit HslV	57.8847	192.36	-1.7326	1.9811e-15	1.0507e-14
K427_23875	glpF	glycerol uptake facilitator GlpF	221.701	6466.92	-4.8664	0	0
K427_23880	glpK	glycerol kinase	1297.03	17921.7	-3.7884	0	0
K427_23885	glpX	fructose 1%2C6-bisphosphatase	71.1548	1260.16	-4.1465	1.6791e-251	1.1144e-249
K427_23965	cpxP	periplasmic repressor CpxP	1552.59	3143.13	-1.0175	6.4352e-88	1.1368e-86
K427_24005	sodA	superoxide dismutase	219.642	544.93	-1.3109	5.9013e-26	4.1286e-25
K427_24400	yhjA	cytochrome C peroxidase	52.1649	8.74363	2.5768	5.8261e-10	2.4456e-09
K427_24410	treF	trehalase	165.875	350.149	-1.0779	2.2445e-12	1.0579e-11
K427_24430	yhjD	membrane protein	93.1189	312.08	-1.7448	2.5963e-24	1.766e-23
K427_24455	yhjG	hypothetical protein	43.4708	124.563	-1.5188	9.8699e-09	3.9281e-08
K427_24485	dctA	C4-dicarboxylate transporter	1618.03	513.991	1.6544	1.3667e-158	4.4747e-157
K427_24520	--	cell division protein	20.8202	51.2511	-1.2996	0.0013496	0.0031323
K427_24525	yhjR	hypothetical protein	13.27	45.0633	-1.7638	9.6548e-05	0.00027002
K427_24590	dppC	peptide transporter	35.463	76.9439	-1.1175	0.00065521	0.0016186
K427_24660	yhjY	hypothetical protein	25.1673	77.751	-1.6273	1.5944e-06	5.2909e-06
K427_24680	yiaD	membrane protein	17.3883	2.69035	2.6923	0.00025822	0.00067672
K427_24705	yiaG	transcriptional regulator	80.0777	452.516	-2.4985	1.3588e-56	1.6519e-55
K427_24805	xylF	D-xylose transporter subunit XylF	89.687	25.5583	1.8111	2.4367e-11	1.0959e-10
K427_24875	yiaK	2%2C3-diketo-L-gulonate reductase	37.9797	13.5862	1.4831	0.00012692	0.00035098
K427_24910	lyxK	xylulose kinase	29.2856	5.51521	2.4087	7.2902e-06	2.2776e-05
K427_24920	sgbU	xylulose 5-phosphate 3-epimerase	18.7611	4.43907	2.0794	0.00092416	0.0022271
K427_24925	sgbE	ribulose 5-phosphate epimerase	16.9307	3.49745	2.2753	0.00093836	0.0022591
K427_24950	yibF	glutathione S-transferase	27.9128	71.5632	-1.3583	8.0922e-05	0.00022946
K427_24955	yibH	membrane protein	8.92294	35.2435	-1.9818	0.00016284	0.00044135
K427_25000	yibT	hypothetical protein	461.705	938.527	-1.0234	9.6264e-28	6.973e-27
K427_25070	fdhF	formate dehydrogenase	562.603	211.058	1.4145	2.0652e-46	2.1308e-45
K427_25075	fdhF	spermidine/putrescine ABC transporter substrate-binding protein	109.821	32.6877	1.7483	4.7874e-13	2.3141e-12
K427_25150	alsB	D-allose transporter subunit	24.9385	6.72587	1.8906	0.00030266	0.00078479
K427_25265	yjdN	hypothetical protein	11.6685	42.5075	-1.8651	7.6362e-05	0.00021728
K427_25360	melA	alpha-galactosidase	68.638	149.583	-1.1239	1.7737e-06	5.8619e-06
K427_25375	fumB	fumarate hydratase	68.4092	15.873	2.1076	1.8382e-10	7.9192e-10
K427_25440	lysU	lysine--tRNA ligase	869.644	377.052	1.2057	1.5078e-57	1.8699e-56
K427_25520	fxsA	phage T7 F exclusion suppressor FxsA	30.2007	69.5455	-1.2034	0.00050706	0.0012731
K427_25595	blc	membrane protein	183.264	453.189	-1.3062	1.0046e-21	6.4078e-21
K427_25740	yjbB	membrane protein	97.0084	274.684	-1.5016	3.4123e-17	1.9262e-16
K427_25845	--	hypothetical protein	22.193	71.1597	-1.681	2.4233e-06	7.892e-06
K427_25900	malE	sugar ABC transporter substrate-binding protein	935.536	188.593	2.3105	8.4193e-136	2.2719e-134
K427_25910	malK	maltose/maltodextrin transporter ATP-binding protein	98.8388	47.6191	1.0535	8.8738e-07	3.0015e-06
K427_25915	lamB	maltoporin	1575.47	458.57	1.7806	5.5582e-169	2.0371e-167
K427_25975	yjbJ	hypothetical protein	1778.64	4684.43	-1.3971	3.4562e-235	2.0207e-233
K427_26075	aphA	acid phosphatase	117.371	43.1801	1.4426	3.6601e-11	1.6312e-10
K427_26095	ssb	single-stranded DNA-binding protein	211.634	445.925	-1.0752	2.7557e-15	1.4552e-14
K427_26175	actP	acetate permease	229.937	706.216	-1.6189	4.8868e-47	5.1282e-46
K427_26180	yjcH	membrane protein	27.9128	133.576	-2.2587	7.74e-16	4.2143e-15
K427_26190	acs	acetyl-CoA synthetase	485.957	1317.87	-1.4393	5.9207e-71	8.3557e-70
K427_26205	nrfA	cytochrome C nitrite reductase	665.56	14.6624	5.5044	1.2058e-167	4.2913e-166
K427_26210	nrfB	cytochrome C nitrite reductase	129.726	4.30455	4.9135	1.2215e-33	9.9985e-33
K427_26215	nrfC	nitrite reductase	71.3836	4.30455	4.0517	5.5559e-18	3.2101e-17
K427_26220	nrfD	nitrite reductase	139.335	3.36293	5.3727	1.6924e-36	1.4842e-35
K427_26370	--	acetolactate synthase	147.114	49.7714	1.5635	6.025e-15	3.1479e-14
K427_26630	fadA	3-ketoacyl-CoA thiolase	120.345	335.755	-1.4802	3.3234e-20	2.02e-19
K427_26660	hemG	protoporphyrinogen oxidase	1.83035	21.6573	-3.5647	2.7306e-05	8.0981e-05
K427_26795	tsr	chemotaxis protein	58.1135	21.9263	1.4062	4.6749e-06	1.4948e-05
K427_26810	yjiY	carbon starvation protein A	1574.79	108.69	3.8569	0	0
K427_26825	yjiA	GTP-binding protein	64.7485	26.9035	1.2671	6.476e-06	2.0335e-05
K427_26910	yjiN	membrane protein	16.9307	95.7763	-2.5	2.9828e-13	1.4591e-12
K427_26915	yjiM	hypothetical protein	61.0878	20.8502	1.5508	5.6692e-07	1.9498e-06
K427_26965	iadA	isoaspartyl dipeptidase	82.3656	29.7283	1.4702	2.0008e-08	7.8359e-08
K427_27040	fimG	fimbrial protein	26.3112	5.51521	2.2542	4.0693e-05	0.00011868
K427_27045	fimF	fimbrial protein	37.9797	9.14718	2.0538	2.8678e-06	9.2905e-06
K427_27050	fimD	fimbrial protein	134.531	28.1141	2.2586	1.559e-20	9.5883e-20
K427_27055	fimC	molecular chaperone FimC	27.684	6.1878	2.1616	3.9067e-05	0.00011434
K427_27065	fimI	fimbrial protein	78.0186	29.4593	1.4051	1.1412e-07	4.1638e-07
K427_27075	fimA	type-1 fimbrial protein subunit A	210.719	89.185	1.2404	1.0437e-15	5.6326e-15
K427_27115	luxS	S-ribosylhomocysteinase	196.991	399.382	-1.0196	1.3092e-12	6.2062e-12
K427_27165	proX	glycine/betaine ABC transporter substrate-binding protein	36.6069	15.4695	1.2427	0.000816	0.001982
K427_27185	nrdF	ribonucleotide-diphosphate reductase subunit beta	2.05914	14.9314	-2.8582	0.0018039	0.004094
K427_27190	nrdE	ribonucleoside-diphosphate reductase	4.11828	26.3654	-2.6785	6.5087e-05	0.00018715
K427_27220	ygaM	hypothetical protein	162.672	358.354	-1.1394	6.6819e-14	3.3554e-13
K427_27265	ygaU	peptidoglycan-binding protein	330.149	908.126	-1.4598	1.2419e-50	1.3737e-49
K427_27270	csiR	transcriptional regulator	31.5735	171.375	-2.4404	7.3229e-22	4.7074e-21
K427_27275	gabP	gamma-aminobutyrate transporter	36.8357	391.311	-3.4091	1.9244e-68	2.6548e-67
K427_27280	gabT	4-aminobutyrate aminotransferase	132.014	1260.56	-3.2553	4.5488e-207	2.1481e-205
K427_27285	gabD	succinate-semialdehyde dehydrogenase	165.646	1083	-2.7089	1.8078e-146	5.4806e-145
K427_27290	lhgO	hydroxyglutarate oxidase	34.5478	282.621	-3.0322	1.1296e-44	1.1276e-43
K427_27295	csiD	carbon starvation induced protein	80.5353	496.638	-2.6245	1.0088e-65	1.3611e-64
K427_27390	rpsP	30S ribosomal protein S16	164.731	51.1166	1.6883	4.4403e-18	2.5716e-17
K427_27395	rimM	16S rRNA-processing protein RimM	436.767	155.368	1.4912	6.9148e-39	6.3122e-38
K427_27400	trmD	tRNA (guanine-N1)-methyltransferase	665.56	262.981	1.3396	6.2827e-51	7.0447e-50
K427_27405	rplS	50S ribosomal protein L19	453.469	176.621	1.3603	6.1174e-36	5.308e-35
K427_27440	pheA	chorismate mutase	308.414	697.338	-1.177	4.09e-27	2.9281e-26
K427_27470	clpB	protein disaggregation chaperone	559.171	1140.3	-1.0281	1.2203e-33	9.9985e-33
K427_27515	zitB	zinc transporter ZitB	48.9618	108.017	-1.1415	3.7664e-05	0.00011063
K427_27520	ybgS	hypothetical protein	308.414	1407.19	-2.1899	1.1759e-144	3.4375e-143
K427_27585	modA	molybdate transporter	50.7921	165.591	-1.7049	3.4695e-13	1.6904e-12
K427_27650	ybhC	acyl-CoA thioesterase	87.6279	42.1039	1.0574	3.4887e-06	1.1243e-05
K427_27660	ybhB	kinase inhibitor	73.2139	167.205	-1.1914	9.2417e-08	3.4075e-07
K427_27725	moaB	molybdopterin biosynthesis protein B	115.769	35.2435	1.7158	2.1522e-13	1.057e-12
K427_27730	moaC	molybdenum cofactor biosynthesis protein MoaC	52.3937	11.972	2.1297	2.0073e-08	7.849e-08
K427_27740	moaE	molybdopterin guanine dinucleotide biosynthesis protein MoaE	37.2933	12.5101	1.5758	7.8665e-05	0.00022332
K427_27745	ybhL	hypothetical protein	367.213	946.329	-1.3657	4.638e-47	4.888e-46
K427_27765	clsB	cardiolipin synthase 2	24.9385	73.7155	-1.5636	6.1826e-06	1.9464e-05
K427_27770	ybhP	hypothetical protein	26.3112	99.2738	-1.9157	6.8402e-10	2.8566e-09
K427_27775	ybhQ	membrane protein	282.102	710.924	-1.3335	2.3731e-34	1.962e-33
K427_27875	yncE	hypothetical protein	79.6201	224.913	-1.4982	2.6482e-14	1.3548e-13
K427_27935	ydcV	spermidine/putrescine ABC transporter permease	19.905	68.6038	-1.7852	1.1924e-06	3.9838e-06
K427_27940	ydcU	spermidine/putrescine ABC transporter permease	26.54	88.3779	-1.7355	7.0144e-08	2.6177e-07
K427_27945	ydcT	polyamine ABC transporter ATP-binding protein	45.3011	122.411	-1.4341	6.3416e-08	2.3884e-07
K427_27950	ydcS	spermidine/putrescine ABC transporter substrate-binding protein	259.681	781.277	-1.5891	2.4862e-50	2.7255e-49
K427_27970	ydcP	protease	31.3447	11.703	1.4213	0.00070802	0.0017369
K427_27985	ydcL	hypothetical protein	226.506	698.817	-1.6254	7.3468e-47	7.6769e-46
K427_28005	ydcK	acetyltransferase	36.6069	109.901	-1.586	2.3333e-08	9.0804e-08
K427_28045	ydcI	hypothetical protein	442.944	210.385	1.0741	5.3323e-26	3.7411e-25
K427_28070	cybB	cytochrome b561	126.523	53.8069	1.2335	5.9314e-10	2.4813e-09
K427_28085	aldA	aldehyde dehydrogenase	1370.02	617.704	1.1492	4.3157e-84	7.1124e-83
K427_28540	yrdA	hypothetical protein	20.1338	56.2282	-1.4817	0.00016258	0.00044115
K427_28580	fmt	methionyl-tRNA formyltransferase	182.577	378.532	-1.0519	1.05e-12	5.0064e-12
K427_28615	rplQ	50S ribosomal protein L17	609.048	297.821	1.0321	2.4239e-33	1.958e-32
K427_28620	rpoA	DNA-directed RNA polymerase subunit alpha	1906.08	862.391	1.1442	1.3326e-115	3.0021e-114
K427_28625	rpsD	30S ribosomal protein S4	969.398	396.961	1.2881	1.0148e-69	1.4078e-68
K427_28630	rpsK	30S ribosomal protein S11	294.915	129.809	1.1839	3.7296e-20	2.2613e-19
K427_28650	rpmJ	50S ribosomal protein L36	169.078	78.8272	1.1009	3.4517e-11	1.5439e-10
K427_28660	rplO	50S ribosomal protein L15	998.455	289.616	1.7856	3.7483e-108	7.8003e-107
K427_28670	rpsE	30S ribosomal protein S5	816.106	240.517	1.7626	2.2082e-87	3.8457e-86
K427_28675	rplR	50S ribosomal protein L18	304.295	80.3068	1.9219	3.3132e-37	2.9478e-36
K427_28680	rplF	50S ribosomal protein L6	802.15	233.657	1.7795	6.6329e-87	1.139e-85
K427_28685	rpsH	30S ribosomal protein S8	473.374	139.36	1.7642	1.6717e-51	1.8918e-50
K427_28690	rpsN	30S ribosomal protein S14	455.757	128.195	1.8299	7.8282e-52	8.8995e-51
K427_28695	rplE	50S ribosomal protein L5	893.667	293.651	1.6056	3.0979e-85	5.14e-84
K427_28700	rplX	50S ribosomal protein L24	243.207	71.9668	1.7568	3.6975e-27	2.6548e-26
K427_28705	rplN	50S ribosomal protein L14	698.735	198.951	1.8123	1.3136e-77	1.955e-76
K427_28710	rpsQ	30S ribosomal protein S17	373.62	101.83	1.8754	4.873e-44	4.7674e-43
K427_28715	rpmC	50S ribosomal protein L29	31.3447	6.45683	2.2793	6.6096e-06	2.0702e-05
K427_28720	rplP	50S ribosomal protein L16	718.64	207.426	1.7927	9.6832e-79	1.4678e-77
K427_28725	rpsC	30S ribosomal protein S3	1467.71	343.557	2.0949	1.9853e-190	8.4053e-189
K427_28730	rplV	50S ribosomal protein L22	276.84	46.274	2.5808	2.7851e-46	2.8615e-45
K427_28735	rpsS	30S ribosomal protein S19	169.078	23.137	2.8694	8.2185e-32	6.4892e-31
K427_28740	rplB	50S ribosomal protein L2	1339.81	223.568	2.5832	5.1204e-217	2.8577e-215
K427_28745	rplW	50S ribosomal protein L23	142.081	16.8147	3.0789	1.3396e-28	9.8193e-28
K427_28750	rplD	50S ribosomal protein L4	497.397	67.6622	2.878	2.2209e-90	3.9808e-89
K427_28755	rplC	50S ribosomal protein L3	1038.95	168.147	2.6273	1.5794e-171	5.9666e-170
K427_28760	rpsJ	30S ribosomal protein S10	615.226	109.901	2.4849	6.2629e-97	1.211e-95
K427_28905	rplK	50S ribosomal protein L11	571.984	110.304	2.3745	3.4983e-86	5.8838e-85
K427_28910	rplA	50S ribosomal protein L1	1512.1	314.232	2.2666	7.3146e-214	3.8216e-212
K427_28915	rplJ	50S ribosomal protein L10	917.462	302.26	1.6019	3.357e-87	5.8052e-86
K427_28930	rpoB	DNA-directed RNA polymerase subunit beta	3344.73	1467.72	1.1883	4.8546e-212	2.4328e-210
K427_29010	zraP	zinc resistance protein	12052.8	3578.56	1.7519	0	0
K427_29025	zraR	transcriptional regulator	281.416	65.9135	2.0941	5.6858e-38	5.1331e-37
K427_29030	purD	phosphoribosylamine--glycine ligase	45.0723	21.1192	1.0937	0.00066059	0.0016303
K427_29185	yjhP	hypothetical protein	44.6147	18.1598	1.2968	0.00014331	0.00039276
K427_29300	fdnI	formate dehydrogenase	798.032	50.3095	3.9875	4.6394e-182	1.8676e-180
K427_29305	fdnH	formate dehydrogenase	182.806	6.1878	4.8847	1.2392e-46	1.2894e-45
K427_29310	fdnG	formate dehydrogenase	379.797	10.3578	5.1964	4.9948e-96	9.4347e-95
K427_29315	fdnG	sulfate ABC transporter substrate-binding protein	51.2497	2.28679	4.4861	6.7779e-14	3.3967e-13
K427_29355	narU	nitrate/nitrite transporter NarK	87.1703	201.372	-1.208	2.8849e-09	1.1886e-08
K427_29360	narZ	nitrate reductase	220.557	627.523	-1.5085	1.7372e-37	1.5512e-36
K427_29365	narY	nitrate reductase	69.5532	277.644	-1.997	1.8553e-26	1.3129e-25
K427_29370	narW	nitrate reductase	24.0233	83.4007	-1.7956	7.4572e-08	2.7745e-07
K427_29375	narV	hypothetical protein	18.7611	88.7814	-2.2425	6.2626e-11	2.7575e-10
K427_29870	sdhC	succinate dehydrogenase	645.426	194.108	1.7334	4.0646e-68	5.5449e-67
K427_29875	sdhD	succinate dehydrogenase	64.0622	12.6446	2.3409	6.3798e-11	2.8025e-10
K427_29880	sdhA	succinate dehydrogenase	2251.56	1121.74	1.0052	2.3569e-114	5.1675e-113
K427_29885	sdhB	succinate dehydrogenase	1879.08	925.614	1.0215	7.5445e-98	1.4821e-96
K427_30065	yddM	XRE family transcriptional regulator	88.7719	23.9441	1.8904	9.3306e-12	4.2588e-11
K427_30070	--	Killer protein	53.5377	18.6979	1.5177	3.8679e-06	1.2432e-05
K427_30075	adhP	ethanol-active dehydrogenase/acetaldehyde-active reductase	11959.9	2086.5	2.5191	0	0
K427_30080	maeA	NAD-dependent malic enzyme	637.876	287.194	1.1512	3.4241e-40	3.197e-39
K427_30090	sra	30S ribosomal subunit S22	574.729	1932.07	-1.7492	4.6098e-142	1.3162e-140
K427_30105	osmC	peroxiredoxin OsmC	298.804	792.711	-1.4076	8.6465e-42	8.1663e-41
K427_30115	dosP	c-di-GMP phosphodiesterase	15.1004	65.779	-2.123	6.1022e-08	2.3053e-07
K427_30120	dosC	diguanylate cyclase	3.4319	25.5583	-2.8967	3.8957e-05	0.00011416
K427_30130	gadC	antiporter	3799.34	16605.8	-2.1279	0	0
K427_30200	yebC	hypothetical protein	150.088	74.119	1.0179	3.321e-09	1.366e-08
K427_30265	murB	UDP-N-acetylenolpyruvoylglucosamine reductase	19.4474	67.7967	-1.8016	1.1552e-06	3.8699e-06
K427_30310	tufB	elongation factor Tu	756.391	221.819	1.7697	1.6169e-81	2.5129e-80
Adapted Es-AgNP was exposed to 1.20 mg/L s-AgNPs in LB medium for 5 h, and untreated wild-type E. coli was used as a biotic control. The differentially expressed genes in Es-AgNP + s-AgNPs compared with control (wild-type E. coli) were identified by considering both the fold change (log2FC > 1) and the p-value (< 0.005).

## Sheet: E. coli + s-AgNPs
Summary of the total numbers of differentially expressed genes in E. coli + s-AgNPs compared to E. coli.
Gene_id	Gene name	Gene description	readcount_E. coli + s-AgNPs	readcount_E. coli	log2FoldChange	pval	padj
K427_00085	yieP	GntR family transcriptional regulator	513.633	136.344	1.9135	5.1604e-51	4.1675e-50
K427_00095	rbsR	transcriptional regulator	39.3804	15.1354	1.3796	0.0010774	0.0020099
K427_00120	rbsD	D-ribose pyranase	197.887	468.313	-1.2428	1.3954e-27	7.6054e-27
K427_00135	viaA	hypothetical protein	82.6989	32.2888	1.3568	2.9159e-06	7.196e-06
K427_00140	asnA	asparagine synthetase AsnA	380.162	98.6321	1.9465	4.5281e-39	3.0832e-38
K427_00155	mnmG	tRNA uridine 5-carboxymethylaminomethyl modification protein	109.703	25.3517	2.1134	1.1924e-13	4.3784e-13
K427_00175	atpE	ATP F0F1 synthase subunit C	223.203	80.5958	1.4696	2.9645e-16	1.1892e-15
K427_00180	atpF	ATP F0F1 synthase subunit B	442.748	200.796	1.1408	5.1478e-21	2.3927e-20
K427_00185	atpH	ATP F0F1 synthase subunit delta	218.421	96.8663	1.173	1.3788e-11	4.6552e-11
K427_00190	atpA	ATP F0F1 synthase subunit alpha	3244.38	878.229	1.8853	3.7094e-306	1.5283e-304
K427_00195	atpG	ATP F0F1 synthase subunit gamma	1217.14	363.627	1.743	4.0773e-104	5.4458e-103
K427_00200	atpD	ATP synthase F0F1 subunit beta	3498.67	1091.64	1.6803	9.7039e-281	3.2762e-279
K427_00220	glmU	bifunctional N-acetylglucosamine-1-phosphate uridyltransferase/glucosamine-1-phosphate acetyltransferase	452.594	179.985	1.3303	4.6276e-27	2.5054e-26
K427_00225	glmS	glucosamine--fructose-6-phosphate aminotransferase	1337.25	371.573	1.8475	7.9982e-124	1.1783e-122
K427_00335	mdtL	multidrug transporter	9.98575	0	3.985	0.0021321	0.0038249
K427_00340	tnaB	tryptophan permease	1561.15	9.4596	7.3666	0	0
K427_00345	tnaA	cysteine desulfhydrase	13760.9	49.5683	8.1169	0	0
K427_00360	yidC	membrane protein insertase	380.162	57.8928	2.7152	7.382e-58	6.5253e-57
K427_00405	gyrB	DNA gyrase subunit B	649.355	1415.79	-1.1245	9.3958e-69	9.399e-68
K427_00415	yidB	hypothetical protein	18.1431	155.642	-3.1007	4.8417e-29	2.7308e-28
K427_00490	ibpA	heat shock protein IbpA	27.5663	80.3435	-1.5433	1.2322e-07	3.3467e-07
K427_00545	yidF	hypothetical protein	35.8643	104.56	-1.5437	1.5943e-09	4.8264e-09
K427_00550	emrD	multidrug resistance protein D	30.6605	10.4686	1.5503	0.0016048	0.0029287
K427_00565	ilvB	acetolactate synthase catalytic subunit	728.538	2881.52	-1.9838	0	0
K427_00570	ilvN	acetolactate synthase 1 regulatory subunit	26.4411	64.1992	-1.2798	3.7995e-05	8.4192e-05
K427_00745	kbaY	hypothetical protein	67.5093	21.694	1.6378	1.0799e-06	2.7604e-06
K427_00775	recG	ATP-dependent DNA helicase RecG	91.7001	33.8023	1.4398	2.4994e-07	6.6838e-07
K427_00785	spoT	(p)ppGpp synthetase	117.579	52.8476	1.1537	9.9691e-07	2.5617e-06
K427_00835	dut	deoxyuridine 5'-triphosphate nucleotidohydrolase	35.4424	12.3605	1.5197	0.00083292	0.001583
K427_00855	rpmB	50S ribosomal protein L28	226.719	108.848	1.0586	2.5799e-10	8.113e-10
K427_00940	waaF	ADP-heptose--LPS heptosyltransferase	78.9015	159.3	-1.0136	6.1602e-08	1.7017e-07
K427_00945	hldD	ADP-L-glycero-D-manno-heptose-6-epimerase	345.141	1273.14	-1.8831	8.4487e-129	1.3081e-127
K427_00960	tdh	L-threonine 3-dehydrogenase	1200.12	408.402	1.5551	3.5114e-87	4.1842e-86
K427_01020	lldD	lactate dehydrogenase	78.3389	36.7033	1.0938	0.00013348	0.0002802
K427_01145	gadB	glutamate decarboxylase	85.2305	1062.88	-3.6405	7.2693e-214	1.7156e-212
K427_01165	ubiF	2-octaprenyl-3-methyl-6-methoxy-1%2C4-benzoquinol hydroxylase	55.6952	156.399	-1.4896	6.3027e-13	2.2399e-12
K427_01175	miaB	(dimethylallyl)adenosine tRNA methylthiotransferase	171.586	55.4963	1.6285	9.782e-15	3.7154e-14
K427_01185	ybeZ	nucleoside triphosphate hydrolase	254.285	522.548	-1.0391	1.4872e-23	7.4232e-23
K427_01190	ybeY	metal-binding heat shock protein	71.4473	194.742	-1.4466	3.8866e-15	1.4925e-14
K427_01245	rihA	ribonucleoside hydrolase	246.128	62.3072	1.9819	1.7484e-26	9.3821e-26
K427_01250	ybeL	hypothetical protein	376.364	849.094	-1.1738	1.0607e-44	7.7666e-44
K427_01325	ybeD	hypothetical protein	19.8309	135.335	-2.7707	5.125e-23	2.5168e-22
K427_01365	yafV	hydrolase	15.1896	49.1899	-1.6953	9.8669e-06	2.3174e-05
K427_01375	cspE	cold-shock protein	4840.14	18339.1	-1.9218	0	0
K427_01380	pagP	phospholipid:lipid A palmitoyltransferase	2.95353	23.7121	-3.0051	1.6858e-05	3.899e-05
K427_01395	dcuC	C4-dicarboxylate transporter	37.2708	11.0993	1.7476	0.00014603	0.00030523
K427_01520	ybdH	oxidoreductase	11.2515	36.7033	-1.7058	0.00012591	0.000265
K427_01525	ybdD	hypothetical protein	69.9003	215.174	-1.6221	3.078e-19	1.3654e-18
K427_01535	entH	thioesterase	1.54709	19.4237	-3.6502	2.4127e-05	5.4915e-05
K427_01540	entA	2%2C3-dihydroxybenzoate-2%2C3-dehydrogenase	3.51611	67.4785	-4.2624	1.5029e-16	6.0888e-16
K427_01550	entE	enterobactin synthase subunit E	2.5316	86.0193	-5.0865	5.802e-22	2.7709e-21
K427_01555	entC	isochorismate synthase	1.2658	21.9463	-4.1159	3.0911e-06	7.6129e-06
K427_01570	fepD	iron-enterobactin transporter membrane protein	3.23482	36.1987	-3.4842	1.467e-08	4.2203e-08
K427_01575	fepG	iron-enterobactin transporter permease	1.12515	22.3247	-4.3104	1.9146e-06	4.8129e-06
K427_01580	fepC	iron-enterobactin transporter ATP-binding protein	2.39095	21.5679	-3.1732	2.5909e-05	5.8861e-05
K427_01595	entF	enterobactin synthase subunit F	17.1586	897.149	-5.7083	1.9181e-215	4.5712e-214
K427_01605	fes	enterobactin esterase	4.78191	32.7933	-2.7777	1.1205e-06	2.852e-06
K427_01670	ybdK	gamma-glutamyl ligase	58.93	766.858	-3.7019	1.0777e-156	1.9262e-155
K427_01775	--	methyltransferase	122.642	39.2258	1.6446	4.3162e-11	1.4236e-10
K427_01825	cysS	cysteine--tRNA ligase	103.936	29.3878	1.8224	6.4459e-11	2.1089e-10
K427_01920	cydB	cytochrome d ubiquinol oxidase subunit 2	6677.51	2540.47	1.3942	0	0
K427_01930	ybgE	hypothetical protein	525.869	196.003	1.4238	1.745e-34	1.1075e-33
K427_02055	yfdE	CoA-transferase	0	16.9012	-4.1016	4.3223e-05	9.5516e-05
K427_02185	yfeO	ion channel protein	16.0335	47.1719	-1.5568	4.5483e-05	0.00010024
K427_02195	ypeC	hypothetical protein	260.333	667.469	-1.3583	7.1025e-44	5.1384e-43
K427_02210	mntH	manganese transport protein MntH	47.6784	704.551	-3.8853	8.3918e-149	1.4366e-147
K427_02275	gltX	glutamyl-tRNA ligase	333.187	103.803	1.6825	2.2054e-28	1.2296e-27
K427_02360	wecC	UDP-N-acetyl-D-mannosamine dehydrogenase	66.1029	26.7391	1.3058	4.9925e-05	0.00010963
K427_02365	wecB	UDP-N-acetylglucosamine 2-epimerase	47.2565	18.0363	1.3896	0.00031583	0.00063765
K427_02390	--	rho operon leader peptide	33.1921	74.2894	-1.1623	3.8432e-05	8.5006e-05
K427_02410	gpp	guanosine polyphosphate pyrophosphohydrolase	152.177	73.5326	1.0493	2.7333e-07	7.3013e-07
K427_02415	rep	ATP-dependent DNA helicase Rep	28.5508	8.5767	1.735	0.00094367	0.0017824
K427_02425	ilvC	ketol-acid reductoisomerase	172.149	46.289	1.8949	5.6834e-18	2.4238e-17
K427_02445	ilvE	branched-chain amino acid aminotransferase	177.071	61.6766	1.5215	7.6546e-14	2.8278e-13
K427_02625	kdpA	potassium-transporting ATPase subunit A	181.572	376.997	-1.054	8.571e-18	3.6297e-17
K427_02655	--	TonB-dependent receptor	14.7677	2.39643	2.6235	0.0019287	0.0034781
K427_02670	speF	ornithine decarboxylase	226.297	4.54061	5.6392	1.2153e-54	1.0366e-53
K427_02675	potE	putrescine transporter	209.841	17.4057	3.5917	5.7574e-42	4.0684e-41
K427_02725	fur	ferric uptake regulator	388.46	1003.85	-1.3697	6.9803e-66	6.7333e-65
K427_02755	glnS	glutamate--tRNA ligase	314.762	150.218	1.0672	6.3519e-14	2.3537e-13
K427_02925	tufB	hypothetical protein	3626.66	1262.79	1.522	1.4608e-251	4.2274e-250
K427_03440	ybiJ	hypothetical protein	54.1481	113.011	-1.0615	2.2466e-06	5.6012e-06
K427_03445	ybiI	hypothetical protein	2.39095	41.7484	-4.1261	1.2093e-10	3.8782e-10
K427_03475	mcbA	hypothetical protein	9.70446	107.209	-3.4656	2.2528e-22	1.0909e-21
K427_03490	ybiO	mechanosensitive channel protein	23.0657	138.741	-2.5886	4.8215e-22	2.3117e-21
K427_03505	glnP	glutamine ABC transporter permease	96.904	356.185	-1.878	3.3206e-37	2.1757e-36
K427_03510	glnH	glutamine ABC transporter substrate-bindnig protein	1257.22	2670.76	-1.087	1.3702e-121	1.9709e-120
K427_03520	dps	DNA starvation/stationary phase protection protein Dps	2040.33	15937.9	-2.9656	0	0
K427_03540	ompX	membrane protein	1774.09	7704.15	-2.1186	0	0
K427_03600	ybiW	formate acetyltransferase	60.3364	538.567	-3.158	1.0295e-97	1.3103e-96
K427_03605	ybiY	pyruvate formate lyase-activating protein	27.4257	153.75	-2.487	2.7908e-23	1.3873e-22
K427_03610	fsaA	fructose-6-phosphate aldolase	26.3005	101.155	-1.9434	3.7785e-12	1.3065e-11
K427_03615	moeB	molybdopterin-synthase adenylyltransferase	39.943	13.2434	1.5927	0.00023847	0.00048647
K427_03665	rimO	ribosomal protein S12 methylthiotransferase	38.8178	6.3064	2.6218	5.0117e-07	1.3185e-06
K427_03670	bssR	biofilm formation regulatory protein BssR	2696.43	7740.85	-1.5214	0	0
K427_03675	yliI	aldose dehydrogenase	19.5496	89.4248	-2.1935	1.8428e-12	6.4176e-12
K427_03680	gstB	glutathione S-transferase	75.2447	29.6401	1.344	9.5239e-06	2.2433e-05
K427_03685	dacC	peptidase M15	161.178	450.403	-1.4826	4.6488e-34	2.92e-33
K427_03780	potF	spermidine/putrescine ABC transporter substrate-binding protein	26.8631	296.779	-3.4657	6.0454e-59	5.3633e-58
K427_03820	artQ	arginine transporter permease subunit ArtQ	11.9548	34.1807	-1.5156	0.00066148	0.0012762
K427_03830	artP	arginine ABC transporter ATP-binding protein	18.1431	54.3612	-1.5832	9.4325e-06	2.224e-05
K427_03835	ybjP	lipoprotein	22.7844	86.7761	-1.9293	1.5313e-10	4.8849e-10
K427_03840	ybjQ	hypothetical protein	60.3364	200.67	-1.7337	1.2313e-19	5.5429e-19
K427_03845	amiD	N-acetylmuramoyl-L-alanine amidase AmiD	65.6809	257.932	-1.9734	4.0216e-29	2.2734e-28
K427_03865	poxB	pyruvate dehydrogenase	107.593	495.683	-2.2038	3.7426e-62	3.4074e-61
K427_03875	hcp	hydroxylamine reductase	21.2373	5.4235	1.9693	0.0018413	0.0033378
K427_03895	aqpZ	porin	30.8011	147.444	-2.2591	3.2898e-20	1.5032e-19
K427_03915	ybjX	hypothetical protein	221.093	538.188	-1.2835	6.131e-33	3.7635e-32
K427_03930	cspD	stationary phase/starvation inducible regulatory protein CspD	3935.09	9761.3	-1.3107	0	0
K427_03935	clpS	Clp protease ClpS	52.3197	133.57	-1.3522	5.9297e-10	1.8269e-09
K427_03975	cydC	amino acid ABC transporter permease	145.567	57.0099	1.3524	6.0629e-10	1.8632e-09
K427_03980	cydD	amino acid ABC transporter permease	78.6202	36.9555	1.0891	0.00013731	0.00028773
K427_03985	trxB	thioredoxin reductase	797.876	349.879	1.1893	4.9022e-39	3.3286e-38
K427_04010	lrp	leucine-responsive transcriptional regulator	440.076	213.409	1.0441	3.1236e-18	1.3415e-17
K427_04050	ycaC	hypothetical protein	26.1599	103.047	-1.9779	1.3424e-12	4.7019e-12
K427_04080	focA	formate transporter	119.126	490.26	-2.0411	4.338e-56	3.7795e-55
K427_04085	ycaO	hypothetical protein	105.202	16.1444	2.7041	3.9082e-17	1.624e-16
K427_04125	cmk	cytidylate kinase	63.1493	147.948	-1.2283	1.3492e-09	4.1256e-09
K427_04130	rpsA	30S ribosomal protein S1	5919.58	1581.39	1.9043	0	0
K427_04135	ihfB	integration host factor subunit beta	184.385	575.522	-1.6422	1.6742e-49	1.3171e-48
K427_04140	ycaI	competence protein ComEC	11.1109	32.541	-1.5503	0.00073383	0.0014049
K427_04210	ldtD	murein L%2CD-transpeptidase	305.339	1630.58	-2.4169	8.563e-223	2.1683e-221
K427_04225	aspC	aromatic amino acid aminotransferase	1307.01	576.027	1.1821	3.1814e-62	2.9073e-61
K427_04235	ompF	porin	22368.6	451.16	5.6317	0	0
K427_04315	pyrD	dihydroorotate dehydrogenase	17.8618	2.2703	2.9759	0.00026812	0.00054405
K427_04340	pqiA	paraquat-inducible membrane protein A	18.8463	107.713	-2.5148	5.7021e-17	2.3493e-16
K427_04350	pqiC	hypothetical protein	62.868	150.471	-1.2591	4.6838e-10	1.456e-09
K427_04360	rmf	ribosome modulation factor	1017.28	9741.5	-3.2594	0	0
K427_04370	ycbZ	Lon protease	72.8538	189.192	-1.3768	8.0712e-14	2.9772e-13
K427_04420	mgsA	methylglyoxal synthase	296.619	141.894	1.0638	3.8255e-13	1.3716e-12
K427_04425	yccT	hypothetical protein	3.51611	29.1356	-3.0507	1.5611e-06	3.9406e-06
K427_04435	yccU	hypothetical protein	67.0874	278.112	-2.0516	9.0566e-33	5.5314e-32
K427_04440	hspQ	heat shock protein HspQ	325.451	1309.08	-2.008	1.0751e-143	1.79e-142
K427_04445	rlmI	23S rRNA methyltransferase	46.272	14.1263	1.7118	3.058e-05	6.8765e-05
K427_04455	yccX	acylphosphatase	8.71995	41.4961	-2.2506	1.0917e-06	2.7846e-06
K427_04465	yccA	membrane protein	415.604	1064.77	-1.3573	7.4091e-69	7.4423e-68
K427_04490	hyaA	hydrogenase	2.39095	15.8921	-2.7327	0.00077555	0.0014821
K427_04495	hyaB	hydrogenase	6.89157	25.7301	-1.9006	0.00055605	0.0010822
K427_04520	cbdA	cytochrome d terminal oxidase subunit 1	8.43866	32.6672	-1.9528	7.5246e-05	0.00016158
K427_04525	cbdB	cytochrome d ubiquinol oxidase subunit 2	13.2206	49.1899	-1.8956	1.888e-06	4.7541e-06
K427_04710	yhdZ	ABC transporter ATP-binding protein	10.267	32.4149	-1.6586	0.00040898	0.0008129
K427_04715	yhdY	amino acid ABC transporter permease	3.51611	34.1807	-3.2811	7.7516e-08	2.1244e-07
K427_04720	yhdX	amino acid ABC transporter permease	2.95353	26.3608	-3.1579	3.4713e-06	8.5063e-06
K427_04725	gltI	amino acid ABC transporter substrate-binding protein	49.9288	196.76	-1.9785	1.1356e-22	5.5319e-22
K427_04780	fis	Fis family transcriptional regulator	84.1053	12.4867	2.7518	3.0579e-14	1.1471e-13
K427_04785	dusB	tRNA-dihydrouridine synthase B	127.564	29.1356	2.1304	8.9743e-16	3.5414e-15
K427_04840	rbsB	sugar ABC transporter	34.5985	7.94606	2.1224	2.9536e-05	6.6603e-05
K427_04865	accC	acetyl-CoA carboxylase	578.892	158.921	1.865	2.4225e-55	2.0808e-54
K427_04870	accB	acetyl-CoA carboxylase	160.757	76.5597	1.0702	7.7517e-08	2.1244e-07
K427_04920	mreB	rod shape-determining protein MreB	199.996	93.0825	1.1034	7.8249e-10	2.4017e-09
K427_04980	yhcO	hypothetical protein	5.0632	76.812	-3.9232	7.7125e-18	3.2833e-17
K427_05030	rplM	50S ribosomal protein L13	1135.42	184.399	2.6223	8.4397e-163	1.5542e-161
K427_05035	rpsI	30S ribosomal protein S9	780.576	158.417	2.3008	8.2229e-97	1.0251e-95
K427_05070	nanA	N-acetylneuraminate lyase	328.967	21.694	3.9226	7.2402e-69	7.3028e-68
K427_05075	nanT	sialic acid transporter	167.789	69.3704	1.2743	2.3401e-10	7.378e-10
K427_05080	nanE	N-acetylmannosamine-6-phosphate 2-epimerase	67.6499	31.4059	1.1071	0.00033621	0.00067487
K427_05085	nanK	N-acetylmannosamine kinase	48.663	18.0363	1.4319	0.00018304	0.00037835
K427_05090	yhcH	hypothetical protein	50.632	22.703	1.1572	0.0012898	0.0023771
K427_05155	yrbL	hypothetical protein	36.8488	99.6411	-1.4351	2.2912e-08	6.514e-08
K427_05255	murA	UDP-N-acetylglucosamine 1-carboxyvinyltransferase	130.518	38.0907	1.7767	6.4237e-13	2.2796e-12
K427_05275	rplU	50S ribosomal protein L21	171.305	52.4693	1.707	1.1848e-15	4.6304e-15
K427_05280	rpmA	50S ribosomal protein L27	170.602	44.5232	1.938	2.4795e-18	1.0705e-17
K427_05295	obgE	GTPase CgtA	33.4734	98.7582	-1.5609	3.3982e-09	1.0111e-08
K427_05320	rlmE	23S rRNA methyltransferase	237.408	732.93	-1.6263	9.7845e-62	8.8091e-61
K427_05340	glmM	phosphoglucosamine mutase	474.675	186.291	1.3494	6.6097e-29	3.7192e-28
K427_05395	infB	translation initiation factor IF-2	1943.56	762.444	1.35	4.8599e-113	6.6744e-112
K427_05415	rpsO	30S ribosomal protein S15	535.574	172.921	1.631	1.0885e-42	7.7369e-42
K427_05425	nlpI	lipoprotein NlpI	481.707	1029.46	-1.0957	1.5508e-48	1.2082e-47
K427_05435	deaD	DEAD/DEAH box helicase	574.251	269.283	1.0926	4.9416e-25	2.5558e-24
K427_05445	mtr	tryptophan permease	324.045	986.321	-1.6059	4.9695e-81	5.5669e-80
K427_05455	yhbV	protease	26.1599	6.18027	2.0816	0.00033509	0.00067318
K427_05460	yhbU	protease	38.1146	6.3064	2.5955	7.3438e-07	1.9052e-06
K427_05500	yraP	membrane protein	180.306	73.1542	1.3014	2.3692e-11	7.9327e-11
K427_05535	agaC	PTS system N-acetylgalactosamine-specific transporter subunit IIC	9.84511	0	5.2864	0.0012182	0.0022571
K427_05545	kbaY	tagatose-bisphosphate aldolase	68.4938	2.64869	4.6926	4.9373e-17	2.0376e-16
K427_05550	agaS	aldose isomerase	96.3414	2.14418	5.4897	3.4522e-24	1.752e-23
K427_05565	nagA	N-acetylglucosamine-6-phosphate deacetylase	75.2447	27.1175	1.4724	2.0035e-06	5.0208e-06
K427_05570	yadI	PTS system N-acetylgalactosamine-specific transporter subunit IIA	23.347	3.53158	2.7248	6.8656e-05	0.00014782
K427_05575	agaD	PTS system N-acetylgalactosamine-specific transporter subunit IID	54.2887	10.0902	2.4277	1.2957e-08	3.7319e-08
K427_05580	agaC	PTS system N-acetylgalactosamine-specific transporter subunit IIC	74.9634	9.08122	3.0452	4.3442e-14	1.6197e-13
K427_05585	agaV	PTS system N-acetylgalactosamine-specific transporter subunit IIB	76.6512	5.54963	3.7878	5.9655e-17	2.4537e-16
K427_05590	kbaZ	tagatose-bisphosphate aldolase	103.796	8.32445	3.6402	8.3775e-22	3.9774e-21
K427_05675	tdcA	transcriptional regulator	68.3532	31.4059	1.122	0.00026767	0.00054357
K427_05680	tdcB	threonine dehydratase	891.545	103.677	3.1042	3.1644e-152	5.4554e-151
K427_05685	tdcC	septum site-determining protein	1252.72	156.146	3.0041	1.5237e-206	3.5275e-205
K427_05690	tdcD	propionate kinase	477.066	34.9375	3.7713	1.8797e-96	2.3313e-95
K427_05695	tdcE	pyruvate formate-lyase	1204.48	43.6403	4.7866	4.321e-273	1.3641e-271
K427_05700	tdcF	endoribonuclease L-PSP	214.201	15.5137	3.7873	1.9332e-44	1.4112e-43
K427_05705	tdcG	serine dehydratase	314.34	43.5142	2.8528	1.2285e-50	9.8232e-50
K427_05715	yhaO	membrane protein	100.139	7.06317	3.8255	8.3764e-22	3.9774e-21
K427_05720	yhaM	membrane protein	187.057	20.685	3.1768	4.6691e-34	2.9252e-33
K427_05745	yhaH	membrane protein	19.1276	43.7664	-1.1942	0.0012539	0.0023144
K427_05755	yqjG	hypothetical protein	35.1611	198.778	-2.4991	9.0284e-30	5.1883e-29
K427_05765	yqjK	membrane protein	77.3544	311.788	-2.011	1.1591e-35	7.4343e-35
K427_05770	yqjE	membrane protein	65.5403	228.67	-1.8028	2.8512e-23	1.4144e-22
K427_05775	yqjD	hypothetical protein	50.21	163.336	-1.7018	6.6967e-16	2.6556e-15
K427_05780	yqjC	hypothetical protein	104.78	630.64	-2.5895	3.8234e-94	4.694e-93
K427_05855	ygjR	oxidoreductase	348.517	725.11	-1.057	7.0341e-33	4.307e-32
K427_05870	rlmG	23S rRNA methyltransferase	20.3934	5.29738	1.9448	0.0024748	0.0043847
K427_05915	ygjI	amino acid permease	30.2385	5.92802	2.3508	3.1407e-05	7.0494e-05
K427_05925	ebgA	beta-D-galactosidase	120.251	14.3786	3.0641	8.7122e-22	4.1283e-21
K427_05930	ebgR	transcriptional regulator	74.4009	20.8111	1.838	2.6933e-08	7.6306e-08
K427_05940	ygjH	methionyl-tRNA synthetase	22.6437	2.52256	3.1662	2.3736e-05	5.4177e-05
K427_05945	patA	putrescine--2-oxoglutarate aminotransferase	136.706	1676.37	-3.6162	0	0
K427_05965	yqjI	transcriptional regulator	48.663	20.9372	1.2168	0.0010103	0.0018994
K427_06000	dnaG	DNA primase	82.5582	170.147	-1.0433	1.034e-08	3.0029e-08
K427_06070	cca	tRNA nucleotidyl transferase	99.2949	198.652	-1.0004	2.1862e-09	6.5527e-09
K427_06130	ribB	3%2C4-dihydroxy-2-butanone 4-phosphate synthase	2856.35	346.726	3.0423	0	0
K427_06170	dsbB	disulfide oxidoreductase	18.0025	66.4695	-1.8845	3.4317e-08	9.5994e-08
K427_06220	cpdA	diguanylate phosphodiesterase	212.232	589.396	-1.4736	1.1366e-43	8.1986e-43
K427_06225	yqiA	esterase	22.925	61.046	-1.413	1.5282e-05	3.5516e-05
K427_06235	fhuA	TonB-dependent receptor	7.03222	33.8023	-2.2651	1.0047e-05	2.3551e-05
K427_06300	ygiW	hypothetical protein	220.39	1334.06	-2.5977	1.1845e-197	2.6176e-196
K427_06305	ygiV	AraC family transcriptional regulator	9.42317	27.3698	-1.5383	0.0020727	0.0037294
K427_06325	parC	DNA topoisomerase IV subunit A	243.315	100.272	1.2789	1.9505e-14	7.3737e-14
K427_06390	ygiQ	hypothetical protein	84.9492	14.757	2.5252	3.3708e-13	1.2121e-12
K427_06410	dkgA	2%2C5-diketo-D-gluconic acid reductase	136.706	515.737	-1.9156	1.9383e-54	1.6475e-53
K427_06430	yghB	membrane protein	36.5675	344.582	-3.2362	1.6218e-64	1.54e-63
K427_06450	exbB	biopolymer transporter ExbB	41.7714	173.552	-2.0548	4.2105e-21	1.9607e-20
K427_06455	exbD	biopolymer transporter ExbD	21.7999	95.9834	-2.1385	6.616e-13	2.3444e-12
K427_06460	yghA	oxidoreductase	15.3302	112.506	-2.8756	4.4565e-20	2.0173e-19
K427_06470	gpr	L-glyceraldehyde 3-phosphate reductase	352.455	171.912	1.0358	1.0043e-14	3.8084e-14
K427_06475	ysgA	dienelactone hydrolase	10.1264	92.3257	-3.1886	2.7263e-18	1.175e-17
K427_06490	hybO	hydrogenase 2 small subunit	220.39	43.1358	2.3531	2.4202e-29	1.3745e-28
K427_06495	hybA	hydrogenase 2 protein HybA	92.4034	19.2976	2.2595	1.2226e-12	4.2949e-12
K427_06500	hybB	hydrogenase 2 b cytochrome subunit	133.612	29.0094	2.2035	4.1843e-17	1.7328e-16
K427_06505	hybC	hydrogenase 2 large subunit	254.285	49.5683	2.359	1.0787e-33	6.7235e-33
K427_06510	hybD	hydrogenase 2 maturation endopeptidase	41.912	13.1173	1.6759	9.3276e-05	0.00019907
K427_06515	hybE	hydrogenase 2-specific chaperone	23.9095	7.1893	1.7337	0.0024913	0.0044108
K427_06635	glcD	glycolate oxidase	1931.61	738.606	1.3869	3.9403e-117	5.4733e-116
K427_06640	glcE	glycolate oxidase	1218.96	307.626	1.9864	1.3284e-124	1.9811e-123
K427_06650	glcG	hypothetical protein	1679.43	154.507	3.4422	0	0
K427_06655	glcB	malate synthase	11990.8	818.571	3.8727	0	0
K427_06665	glcA	glycolate permease glcA	1250.05	49.0638	4.6712	8.5885e-281	2.9405e-279
K427_06680	yghJ	Accessory colonization factor AcfD	92.8253	46.0367	1.0117	9.9242e-05	0.00021088
K427_06775	speC	ornithine decarboxylase	52.7416	20.1805	1.386	0.00014616	0.00030523
K427_06790	mltC	murein transglycosylase	31.645	8.32445	1.9266	0.00017974	0.00037184
K427_06805	trmI	tRNA (guanine-N7)-methyltransferase	19.9715	61.9289	-1.6327	1.3542e-06	3.4255e-06
K427_06825	ansB	L-asparaginase II	4248.44	135.588	4.9696	0	0
K427_06880	rsmE	16S rRNA methyltransferase	24.8941	94.4699	-1.9241	2.5877e-11	8.6168e-11
K427_06905	metK	S-adenosylmethionine synthetase	147.395	313.05	-1.0867	1.0607e-15	4.1653e-15
K427_06940	loiP	metalloprotease	132.768	306.239	-1.2057	8.0732e-18	3.4309e-17
K427_06950	tktA	transketolase	1620.36	313.806	2.3684	6.117e-206	1.4028e-204
K427_07020	--	cobalt ABC transporter permease	16.4554	3.40546	2.2726	0.0026289	0.0046409
K427_07025	--	membrane protein	45.5688	7.81994	2.5428	8.6891e-08	2.3759e-07
K427_07030	--	DNA-binding protein	18.1431	3.40546	2.4135	0.0010529	0.0019673
K427_07150	zapA	Z-ring-associated protein	471.862	979.384	-1.0535	1.3515e-43	9.7195e-43
K427_07185	gcvT	glycine cleavage system protein T	580.158	32.9194	4.1394	5.4355e-124	8.0567e-123
K427_07190	gcvH	glycine cleavage system protein H	460.892	20.0544	4.5224	2.0731e-103	2.7537e-102
K427_07195	gcvP	glycine dehydrogenase	1258.06	47.6764	4.7218	9.5951e-284	3.3803e-282
K427_07265	lysS	lysine--tRNA ligase	567.219	173.931	1.7054	5.06e-48	3.9297e-47
K427_07270	idi	isopentenyl-diphosphate delta-isomerase	23.2063	102.038	-2.1365	1.2999e-13	4.7659e-13
K427_07315	xdhD	hypoxanthine oxidase	113.078	54.6134	1.05	9.2494e-06	2.185e-05
K427_07325	ssnA	chlorohydrolase	43.1778	18.5408	1.2196	0.0019178	0.003461
K427_07330	ygfK	selenate reductase subunit YgfK	164.554	50.1989	1.7128	3.664e-15	1.4093e-14
K427_07360	ygeY	peptidase	58.2268	17.5318	1.7317	2.4062e-06	5.9868e-06
K427_07365	ygeX	diaminopropionate ammonia-lyase	31.5043	7.81994	2.0103	0.00011987	0.00025272
K427_07370	ygeW	ornithine carbamoyltransferase	59.3519	9.58573	2.6303	4.7904e-10	1.4853e-09
K427_07475	galR	transcriptional regulator	89.7311	295.518	-1.7196	7.3385e-28	4.0268e-27
K427_07505	tas	aldo/keto reductase	437.826	182.507	1.2624	2.9572e-24	1.5039e-23
K427_07510	ygdR	hypothetical protein	56.1171	113.767	-1.0196	4.2927e-06	1.0415e-05
K427_07550	thyA	thymidylate synthase	126.017	43.7664	1.5257	2.6164e-10	8.2171e-10
K427_07805	ygdI	hypothetical protein	75.3854	1737.29	-4.5264	0	0
K427_07810	gcvA	transcriptional regulator	30.0979	106.074	-1.8173	1.0126e-11	3.4379e-11
K427_07820	rlmM	23S rRNA methyltransferase	45.7094	127.137	-1.4758	1.1756e-10	3.7751e-10
K427_07825	fucR	transcriptional regulator	71.588	33.5501	1.0934	0.00026177	0.00053249
K427_07870	sdaB	serine dehydratase	107.452	24.4688	2.1347	1.4825e-13	5.4028e-13
K427_07875	sdaC	serine/threonine protein kinase	271.022	52.4693	2.3689	5.6795e-36	3.6718e-35
K427_07920	yqcA	flavodoxin	130.377	380.654	-1.5458	9.7623e-31	5.7045e-30
K427_07990	pyrG	CTP synthetase	598.723	1243.24	-1.0541	6.3662e-55	5.449e-54
K427_08020	queE	pyrroloquinoline quinone biosynthesis protein	33.8953	141.768	-2.0644	1.2821e-17	5.3829e-17
K427_08120	hokE	membrane protein	472.706	1117.24	-1.2409	2.7418e-63	2.5536e-62
K427_08185	cysN	sulfate adenylyltransferase subunit 1	24.0502	55.2441	-1.1998	0.00027491	0.00055736
K427_08205	ftsB	cell division protein FtsB	10.267	36.451	-1.8279	6.2168e-05	0.00013457
K427_08295	mutS	DNA mismatch repair protein MutS	274.678	82.2355	1.7399	8.8437e-25	4.545e-24
K427_08335	hypB	hydrogenase nickel incorporation protein HypB	146.411	59.7847	1.2922	2.1469e-09	6.4508e-09
K427_08390	hycI	hydrogenase 3 maturation protease	17.4399	44.7754	-1.3603	0.00031676	0.000639
K427_08540	alaS	alanyl-tRNA synthetase	1344.98	560.891	1.2618	6.1648e-71	6.3768e-70
K427_08550	csrA	carbon storage regulator	536.699	5108.31	-3.2507	0	0
K427_08580	#N/A	#N/A	2.39095	16.1444	-2.7554	0.00066798	0.0012877
K427_08590	#N/A	#N/A	25.5973	116.416	-2.1852	1.0509e-15	4.1337e-15
K427_08605	cbpM	chaperone-modulator protein CbpM	93.3879	440.061	-2.2364	2.457e-56	2.1484e-55
K427_08610	cbpA	DNA-binding protein	291.837	1872.12	-2.6814	5.5085e-286	1.9986e-284
K427_08630	agp	glucose-1-phosphatase	901.812	1981.72	-1.1359	5.447e-97	6.8252e-96
K427_08635	yccJ	hypothetical protein	92.544	423.916	-2.1956	3.5105e-53	2.9125e-52
K427_08640	wrbA	NAD(P)H:quinone oxidoreductase	323.341	1512.4	-2.2257	5.7296e-188	1.2007e-186
K427_08645	ymdF	hypothetical protein	29.8166	4222.39	-7.1458	0	0
K427_08705	putA	transcriptional regulator	2831.17	116.29	4.6056	0	0
K427_08720	putP	proline:sodium symporter PutP	272.85	123.605	1.1424	1.4437e-13	5.2696e-13
K427_08730	--	iron permease	4.78191	41.1177	-3.1041	8.8441e-09	2.5778e-08
K427_08735	efeO	ferrous iron transporter	18.987	78.7039	-2.0514	2.2716e-10	7.1806e-10
K427_08740	efeB	peroxidase	11.3922	98.8844	-3.1177	3.9975e-19	1.77e-18
K427_08885	ymdB	RNase III inhibitor	25.8786	63.3163	-1.2908	3.8292e-05	8.4773e-05
K427_08890	clsC	hypothetical protein	28.6915	68.1091	-1.2472	3.1702e-05	7.1025e-05
K427_08930	msyB	secY/secA suppressor protein	53.8668	413.826	-2.9416	7.6762e-71	7.9066e-70
K427_08955	yceA	sulfurtransferase	26.4411	54.9918	-1.0564	0.0010127	0.0019024
K427_09005	pyrC	dihydroorotase	41.7714	9.4596	2.1427	3.8779e-06	9.4739e-06
K427_09020	grxB	glutaredoxin	363.284	888.32	-1.29	1.212e-53	1.0125e-52
K427_09025	mdtH	multidrug resistance protein MdtH	29.5353	68.2353	-1.2081	4.8133e-05	0.00010579
K427_09075	flgB	flagellar basal body rod protein FlgB	9.42317	0	4.2362	0.0023835	0.0042385
K427_09085	flgD	flagellar basal body rod modification protein	48.663	2.90094	4.0682	8.8934e-12	3.0449e-11
K427_09090	flgE	flagellar hook protein FlgE	79.7454	4.54061	4.1344	1.6829e-18	7.3183e-18
K427_09095	flgF	flagellar basal body rod protein FlgF	41.0682	1.89192	4.4401	1.3783e-10	4.4084e-10
K427_09100	flgG	flagellar basal body rod protein FlgG	38.5366	3.1532	3.6113	5.5821e-09	1.6428e-08
K427_09250	ycfH	DNAse	43.1778	573.504	-3.7314	2.514e-118	3.5738e-117
K427_09255	ptsG	PTS glucose-specific subunit IIBC	158.225	468.313	-1.5655	4.4711e-38	2.9859e-37
K427_09320	ycfJ	hypothetical protein	107.171	247.968	-1.2102	8.5406e-15	3.2489e-14
K427_09345	ycfT	membrane protein	3.37546	39.9826	-3.5662	1.8885e-09	5.6884e-09
K427_09355	lolD	lipoprotein ABC transporter ATP-binding protein	27.9882	8.70283	1.6853	0.0013457	0.0024745
K427_09390	potD	spermidine/putrescine ABC transporter substrate-binding protein	365.957	98.8844	1.8879	3.3395e-36	2.1705e-35
K427_09405	potA	putrescine/spermidine ABC transporter ATPase	24.8941	7.69381	1.694	0.0024051	0.0042737
K427_09440	purB	adenylosuccinate lyase	125.033	34.9375	1.8395	5.5023e-13	1.9641e-12
K427_09445	hflD	lysogenization regulator	30.2385	10.5948	1.513	0.0020961	0.003766
K427_09450	mnmA	tRNA 2-thiouridylase	60.899	23.3337	1.384	4.58e-05	0.00010084
K427_09470	icd	isocitrate dehydrogenase	4523.69	1621.25	1.4804	1.3997e-300	5.4879e-299
K427_09665	borD	hypothetical protein	50.9133	4.79286	3.4091	5.8728e-11	1.924e-10
K427_09780	--	tail protein	12.5173	36.1987	-1.532	0.0004135	0.00082054
K427_09850	znuB	iron ABC transporter permease	7.03222	39.0997	-2.4751	5.7606e-07	1.5057e-06
K427_09855	znuB	membrane protein	4.64126	41.8745	-3.1735	4.5782e-09	1.3506e-08
K427_09860	fhuC	manganese/iron transporter ATP-binding protein	9.56382	83.6229	-3.1282	1.8573e-16	7.475e-16
K427_09865	znuA	iron ABC transporter substrate-binding protein	7.73544	81.3526	-3.3946	4.2362e-17	1.7513e-16
K427_09895	bluR	transcriptional regulator	21.3779	50.4512	-1.2388	0.00036722	0.00073409
K427_09915	ariR	two-component-system connector protein AriR	23.347	135.714	-2.5393	3.4974e-21	1.6318e-20
K427_09985	ymgG	hypothetical protein	32.2076	2.01805	3.9964	3.378e-08	9.46e-08
K427_10075	ycgN	hypothetical protein	12.9393	58.0189	-2.1648	1.8037e-08	5.1523e-08
K427_10125	nhaB	sodium/proton antiporter	183.4	84.758	1.1136	2.9722e-09	8.8759e-09
K427_10140	ycgB	SpoVR family protein	204.638	3363.08	-4.0386	0	0
K427_10145	dadA	amino acid dehydrogenase	644.292	1358.4	-1.0761	9.1634e-62	8.2806e-61
K427_10150	dadX	alanine racemase	243.455	656.749	-1.4317	1.5361e-46	1.1669e-45
K427_10175	ymgE	hypothetical protein	5.0632	133.317	-4.7187	1.8476e-32	1.1172e-31
K427_10215	treA	trehalase	42.8965	222.364	-2.374	2.4906e-31	1.4731e-30
K427_10270	ychH	hypothetical protein	3643.11	12066.8	-1.7278	0	0
K427_10280	prs	ribose-phosphate pyrophosphokinase	390.569	148.453	1.3956	2.7263e-25	1.4222e-24
K427_10300	prfA	peptide chain release factor 1	65.8216	31.1536	1.0792	0.00053614	0.0010476
K427_10315	ychA	hypothetical protein	41.2088	139.371	-1.7579	2.399e-14	9.0132e-14
K427_10350	chaB	cation transport regulator	15.3302	50.8296	-1.7293	5.2434e-06	1.2582e-05
K427_10355	chaC	transporter	36.005	129.407	-1.8457	3.1043e-14	1.1627e-13
K427_10370	narL	transcriptional regulator NarL	348.235	47.9286	2.8611	4.5645e-56	3.9627e-55
K427_10375	narX	nitrate/nitrite sensor protein NarX	248.237	88.0373	1.4955	2.392e-18	1.0346e-17
K427_10385	narK	nitrate/nitrite transporter NarK	2066.49	21.3156	6.5991	0	0
K427_10395	narG	nitrate reductase	11336.2	255.031	5.4741	0	0
K427_10400	narH	nitrate reductase	3482.5	140.254	4.634	0	0
K427_10405	narJ	nitrate reductase	690.423	29.6401	4.5419	3.2331e-154	5.6136e-153
K427_10410	narI	nitrate reductase	1012.92	42.7574	4.5662	8.0865e-226	2.1137e-224
K427_10440	rssB	response regulator of RpoS	65.1183	272.689	-2.0661	1.9531e-32	1.1781e-31
K427_10465	adhE	acetaldehyde dehydrogenase	1533.3	4140.28	-1.4331	2.7962e-284	9.9958e-283
K427_10490	oppA	peptide ABC transporter substrate-binding protein	5999.19	1465.73	2.0331	0	0
K427_10495	oppB	oligopeptide transporter permease	92.1221	38.9736	1.2411	4.2931e-06	1.0415e-05
K427_10505	oppD	oligopeptide transporter ATP-binding component	523.76	246.833	1.0854	9.7371e-23	4.7625e-22
K427_10530	kch	voltage-gated potassium channel	23.0657	50.0728	-1.1183	0.0010388	0.0019484
K427_10570	ompW	membrane protein	58.0861	267.139	-2.2013	2.9345e-34	1.8528e-33
K427_10585	yciG	hypothetical protein	2.95353	131.425	-5.4757	4.679e-33	2.8868e-32
K427_10595	trpA	tryptophan synthase subunit alpha	1575.08	93.7131	4.071	0	0
K427_10600	trpB	tryptophan synthase subunit beta	1543.99	87.1545	4.1469	0	0
K427_10605	trpC	indole-3-glycerol phosphate synthase	311.387	50.9557	2.6114	8.6873e-46	6.4777e-45
K427_10610	trpD	glutamine amidotransferase	319.825	66.8478	2.2583	7.6251e-40	5.2508e-39
K427_10620	yciV	S-adenosylmethionine tRNA ribosyltransferase	22.3625	55.6225	-1.3146	9.1307e-05	0.00019504
K427_10640	btuR	cob(I)alamin adenolsyltransferase/cobinamide ATP-dependent adenolsyltransferase	55.1326	25.604	1.1065	0.0012134	0.0022499
K427_10675	topA	DNA topoisomerase I	532.902	256.67	1.054	4.5549e-22	2.1882e-21
K427_10705	acnA	aconitate hydratase	918.97	2537.44	-1.4653	1.468e-180	2.9492e-179
K427_10715	pgpB	phosphatidylglycerophosphatase	39.3804	83.749	-1.0886	3.2767e-05	7.321e-05
K427_10720	yciS	membrane protein	26.1599	56.0008	-1.0981	0.00062743	0.0012143
K427_10745	osmB	lipoprotein	169.476	1409.86	-3.0564	2.6343e-245	7.5335e-244
K427_10765	gmr	RNase II stability modulator	71.1661	549.414	-2.9486	1.1963e-93	1.4613e-92
K427_10775	rnb	exoribonuclease II	245.284	65.3343	1.9085	3.6614e-25	1.9018e-24
K427_10845	sapC	peptide ABC transporter permease	15.8928	44.0187	-1.4697	0.00015721	0.0003269
K427_10850	sapB	peptide ABC transporter permease	17.018	73.5326	-2.1113	4.3424e-10	1.3533e-09
K427_10855	sapA	peptide ABC transporter substrate-binding protein	46.5533	134.579	-1.5315	9.9334e-12	3.3819e-11
K427_11000	tpx	peroxidase	2709.09	995.781	1.4439	5.8869e-174	1.1448e-172
K427_11005	ycjG	L-alanine-DL-glutamate epimerase	70.7441	148.957	-1.0742	4.2147e-08	1.1722e-07
K427_11065	fnr	transcriptional regulator	448.937	1371.39	-1.6111	1.9409e-112	2.6506e-111
K427_11110	ydaN	zinc transporter	43.7404	92.3257	-1.0778	1.5135e-05	3.5207e-05
K427_11130	dbpA	ATP-dependent RNA helicase DbpA	15.8928	47.8025	-1.5887	3.1235e-05	7.0172e-05
K427_11205	hslJ	heat-inducible protein	38.2553	170.651	-2.1573	5.6763e-22	2.7162e-21
K427_11260	gadB	glutamate decarboxylase	341.344	3531.08	-3.3708	0	0
K427_11295	fimA	fimbrial protein	13.7831	0	3.9645	0.00031543	0.00063737
K427_11350	tam	trans-aconitate methyltransferase	12.2361	45.28	-1.8877	5.132e-06	1.2339e-05
K427_11405	ydeA	arabinose transporter	15.6115	36.9555	-1.2432	0.0022331	0.0039915
K427_11410	marC	hypothetical protein	11.1109	39.6042	-1.8337	2.8797e-05	6.5057e-05
K427_11570	ynfD	membrane protein	43.1778	385.952	-3.1601	1.3484e-70	1.383e-69
K427_11575	ynfE	dimethyl sulfoxide reductase	10.4077	47.8025	-2.1994	2.4718e-07	6.6173e-07
K427_11580	ynfF	dimethyl sulfoxide reductase	26.0192	54.1089	-1.0563	0.0011136	0.0020727
K427_11625	ynfM	membrane protein	7.45415	79.839	-3.421	6.6297e-17	2.7177e-16
K427_11635	--	acid shock protein precursor	84.5273	34.9375	1.2746	6.8302e-06	1.6278e-05
K427_11645	ydgD	serine protease	59.6332	350.005	-2.5532	2.7348e-52	2.2459e-51
K427_11690	ydgH	hypothetical protein	177.774	71.6407	1.3112	2.4928e-11	8.3237e-11
K427_11705	folM	dihydromonapterin reductase	8.57931	31.6581	-1.8836	0.00014074	0.00029467
K427_11745	ydgA	hypothetical protein	487.333	2201.44	-2.1755	2.3496e-265	7.2297e-264
K427_11770	uidR	TetR family transcriptional regulator	70.6035	295.266	-2.0642	6.0819e-35	3.8702e-34
K427_11885	pdxY	pyridoxamine kinase	35.3017	8.95509	1.979	5.6018e-05	0.00012191
K427_11890	tyrS	tyrosyl-tRNA synthetase	229.954	86.7761	1.406	1.0669e-15	4.1831e-15
K427_11900	mliC	lysozyme inhibitor	25.1753	51.7125	-1.0385	0.0016632	0.0030262
K427_11915	slyB	membrane protein	436.138	1377.7	-1.6594	1.2537e-117	1.7617e-116
K427_11945	sodC	superoxide dismutase	79.886	1217.26	-3.9296	1.9945e-257	5.9126e-256
K427_11950	ydhF	oxidoreductase	90.4343	197.516	-1.127	5.5994e-11	1.8369e-10
K427_11955	ydhL	oxidoreductase	2.95353	16.6489	-2.4949	0.0010506	0.0019661
K427_11965	nemA	N-ethylmaleimide reductase	92.2627	24.7211	1.9	2.3607e-10	7.4333e-10
K427_11970	gloA	glyoxalase I	53.4449	22.1985	1.2676	0.00036888	0.0007368
K427_12005	sodB	superoxide dismutase	2685.18	897.653	1.5808	1.6894e-197	3.6997e-196
K427_12045	cfa	cyclopropane fatty acyl phospholipid synthase	303.229	1598.29	-2.3981	1.6961e-216	4.0822e-215
K427_12085	ydhS	hypothetical protein	38.2553	563.666	-3.8811	2.3153e-119	3.3107e-118
K427_12110	ydhV	oxidoreductase	55.5545	23.7121	1.2283	0.00040048	0.00079664
K427_12155	ldtE	murein L%2CD-transpeptidase	86.3556	622.063	-2.8487	2.4017e-102	3.1729e-101
K427_12165	sufE	cysteine desufuration protein SufE	5.48513	35.9465	-2.7123	4.7576e-07	1.253e-06
K427_12170	sufS	cysteine sulfinate desulfinase	29.8166	319.987	-3.4238	7.9848e-63	7.3522e-62
K427_12175	sufD	cysteine desulfurase	47.5378	431.232	-3.1813	4.0752e-79	4.4622e-78
K427_12180	sufC	cysteine desulfurase	15.7522	183.516	-3.5423	1.0116e-37	6.6642e-37
K427_12185	sufB	cysteine desulfurase	34.1766	465.791	-3.7686	4.1401e-97	5.2145e-96
K427_12190	sufA	iron-sulfur cluster assembly scaffold protein	9.14188	158.165	-4.1128	5.7874e-36	3.7317e-35
K427_12195	ydiH	hypothetical protein	11.8141	124.993	-3.4033	1.801e-25	9.4556e-25
K427_12325	ydiU	hypothetical protein	69.197	218.328	-1.6577	4.7669e-20	2.1538e-19
K427_12355	ihfA	integration host factor subunit alpha	466.658	956.05	-1.0347	1.8867e-41	1.3255e-40
K427_12455	ydiZ	hypothetical protein	30.9418	94.0915	-1.6045	4.0204e-09	1.1933e-08
K427_12465	yniB	membrane protein	39.2398	180.111	-2.1985	1.3313e-23	6.6863e-23
K427_12490	katE	hydroperoxidase	32.0669	322.257	-3.3291	7.1515e-62	6.4866e-61
K427_12515	chbC	PTS system N%2CN'-diacetylchitobiose-specific transporter subunit IIC	15.0489	43.7664	-1.5402	9.7109e-05	0.00020671
K427_12530	osmE	transcriptional regulator	270.178	1413.77	-2.3876	8.8734e-191	1.8756e-189
K427_12540	cho	nucleotide excision repair endonuclease	21.5186	72.5236	-1.7529	3.9934e-08	1.1145e-07
K427_12560	astE	succinylglutamate desuccinylase	27.4257	826.012	-4.9126	4.1983e-194	9.0313e-193
K427_12565	astB	succinylarginine dihydrolase	21.5186	585.108	-4.765	8.4462e-137	1.3332e-135
K427_12570	astD	succinylglutamate-semialdehyde dehydrogenase	65.3996	1244.63	-4.2503	4.489e-275	1.4358e-273
K427_12575	astA	arginine succinyltransferase	23.0657	237.625	-3.3649	1.7417e-46	1.3189e-45
K427_12580	astC	acetylornithine aminotransferase	73.8383	531.503	-2.8476	1.0828e-87	1.2966e-86
K427_12610	ydjY	hypothetical protein	31.5043	5.92802	2.4099	1.6097e-05	3.7373e-05
K427_12640	ynjE	thiosulfate sulfurtransferase	110.968	20.5589	2.4323	3.9716e-16	1.5853e-15
K427_12665	gdhA	glutamate dehydrogenase	624.602	161.696	1.9497	3.4204e-63	3.1735e-62
K427_12765	yeaD	glucose-6-phosphate 1-epimerase	135.722	67.2262	1.0136	2.4292e-06	6.0378e-06
K427_12775	mipA	MltA-interacting protein MipA	166.382	32.0365	2.3767	8.3323e-23	4.0836e-22
K427_12785	yeaG	serine/threonine protein kinase	515.743	6282.69	-3.6067	0	0
K427_12790	yeaH	hypothetical protein	54.8513	1016.97	-4.2126	4.1437e-224	1.0716e-222
K427_12805	yeaJ	diguanylate cylase	47.1159	15.5137	1.6027	6.092e-05	0.00013198
K427_12870	yeaQ	hypothetical protein	65.259	411.177	-2.6555	1.1358e-63	1.066e-62
K427_12885	yeaR	hypothetical protein	10.689	1.00902	3.4051	0.0027149	0.0047822
K427_12915	fadD	long-chain fatty acid--CoA ligase	428.543	926.032	-1.1116	8.4881e-45	6.2525e-44
K427_12925	yeaY	membrane protein	154.146	414.709	-1.4278	6.6527e-30	3.8596e-29
K427_12940	yoaB	endoribonuclease L-PSP	44.0217	13.8741	1.6658	6.6902e-05	0.0001443
K427_12975	sdaA	serine dehydratase	401.54	1970.88	-2.2952	2.1497e-253	6.2959e-252
K427_12985	yoaD	c-di-GMP phosphodiesterase	6.04771	43.1358	-2.8344	1.6849e-08	4.8241e-08
K427_13080	kdgR	transcriptional regulator	49.5068	106.704	-1.1079	2.002e-06	5.0208e-06
K427_13100	proQ	ProP expression regulator	322.076	125.623	1.3583	2.5184e-20	1.1529e-19
K427_13110	yebS	membrane protein	18.5651	64.9559	-1.8069	1.1309e-07	3.075e-07
K427_13125	yebV	hypothetical protein	8.57931	446.115	-5.7004	3.8746e-108	5.2326e-107
K427_13130	yebW	hypothetical protein	10.267	92.578	-3.1726	2.9089e-18	1.2515e-17
K427_13135	pphA	serine/threonine protein phosphatase	2.10967	42.6313	-4.3368	4.3781e-11	1.4421e-10
K427_13145	yebY	hypothetical protein	71.8693	26.2346	1.4539	4.215e-06	1.0256e-05
K427_13155	yobA	hypothetical protein	114.625	37.9645	1.5942	4.6943e-10	1.4574e-09
K427_13175	ptrB	protease 2	61.0397	134.579	-1.1406	4.7452e-08	1.3183e-07
K427_13200	yebF	hypothetical protein	33.7546	294.887	-3.127	7.0386e-54	5.8999e-53
K427_13215	eda	keto-deoxy-phosphogluconate aldolase	158.506	68.8659	1.2027	4.1616e-09	1.2322e-08
K427_13220	edd	phosphogluconate dehydratase	52.7416	24.2166	1.1229	0.0013559	0.0024914
K427_13255	pykA	pyruvate kinase	1080.15	407.393	1.4067	9.5956e-68	9.4435e-67
K427_13280	znuB	high-affinity zinc transporter membrane component	11.9548	42.1268	-1.8172	1.8035e-05	4.1633e-05
K427_13340	yegP	hypothetical protein	321.794	3728.34	-3.5343	0	0
K427_13345	yegQ	protease	78.6202	33.8023	1.2178	2.8933e-05	6.5303e-05
K427_13370	yegS	lipid kinase	4.07869	45.4061	-3.4767	2.3003e-10	7.2618e-10
K427_13415	fbaB	fructose-bisphosphate aldolase	559.624	1695.92	-1.5995	3.1373e-137	5.0173e-136
K427_13525	metG	methionine--tRNA ligase	280.867	66.974	2.0682	1.2295e-31	7.3433e-31
K427_13610	yehT	two-component response-regulatory protein YehT	44.1623	15.5137	1.5093	0.00020673	0.00042551
K427_13625	mlrA	MerR family transcriptional regulator	12.9393	127.894	-3.3051	1.9081e-25	9.9965e-25
K427_13635	yehW	osmoprotectant uptake system permease	5.48513	22.3247	-2.025	0.00080818	0.0015392
K427_13645	yehY	osmoprotectant uptake system permease	3.93804	18.9192	-2.2643	0.00095589	0.0018041
K427_13650	osmF	osmoprotectant uptake system substrate-binding protein	17.7212	103.299	-2.5433	1.6005e-16	6.4628e-16
K427_13660	bglX	beta-D-glucoside glucohydrolase	175.102	78.0732	1.1653	1.7469e-09	5.2686e-09
K427_13670	dld	lactate dehydrogenase	1184.08	412.691	1.5206	3.0098e-83	3.4512e-82
K427_13690	yohC	membrane protein	18.5651	487.737	-4.7154	5.8704e-114	8.108e-113
K427_13695	yohD	membrane protein	24.7534	62.1811	-1.3288	3.0403e-05	6.8493e-05
K427_13705	yohF	oxidoreductase	7.87608	67.983	-3.1096	1.3466e-13	4.9296e-13
K427_13780	mglC	beta-methylgalactoside transporter permease	179.884	72.5236	1.3105	1.938e-11	6.5157e-11
K427_13785	mglA	sugar ABC transporter ATP-binding protein	183.541	32.0365	2.5183	1.2312e-26	6.6212e-26
K427_13790	mglB	sugar ABC transporter substrate-binding protein	1394.49	255.283	2.4496	1.1073e-184	2.2811e-183
K427_13810	folE	GTP cyclohydrolase	143.317	60.7937	1.2372	1.071e-08	3.1066e-08
K427_13920	fruA	PTS system fructose-specific transporter subunits IIBC	66.6654	146.939	-1.1402	1.1686e-08	3.3858e-08
K427_13925	fruK	1-phosphofructokinase	30.0979	64.7037	-1.1042	0.00022289	0.00045684
K427_13960	yeiP	elongation factor P	35.583	10.847	1.7139	0.00025293	0.00051494
K427_13995	mepS	membrane protein	91.7001	41.7484	1.1352	2.0177e-05	4.6359e-05
K427_14055	rplY	50S ribosomal protein L25	263.708	42.5051	2.6332	2.1643e-39	1.4778e-38
K427_14120	ccmH	heme lyase subunit CcmH	121.376	36.5771	1.7305	1.0074e-11	3.4249e-11
K427_14125	dsbE	thiol:disulfide interchange protein DsbE	38.1146	8.45058	2.1732	8.5384e-06	2.0249e-05
K427_14130	ccmF	cytochrome C biogenesis protein CcmF	69.619	12.8651	2.436	1.0984e-10	3.5366e-10
K427_14135	ccmE	cytochrome C biogenesis protein CcmE	20.8154	3.1532	2.7228	0.00017174	0.00035591
K427_14145	ccmC	heme ABC transporter permease	30.0979	6.81091	2.1437	8.8155e-05	0.00018864
K427_14150	ccmB	heme ABC transporter permease	27.285	8.45058	1.691	0.0015071	0.0027567
K427_14155	ccmA	cytochrome C biogenesis protein CcmA	57.9455	22.8292	1.3438	0.00010233	0.00021724
K427_14160	napC	cytochrome C	178.9	26.1085	2.7766	8.8364e-29	4.9607e-28
K427_14165	napB	nitrate reductase	91.7001	2.90094	4.9823	1.0825e-22	5.2839e-22
K427_14170	napH	quinol dehydrogenase	215.889	12.8651	4.0688	7.6698e-47	5.8629e-46
K427_14175	napG	quinol dehydrogenase	308.152	12.9912	4.568	4.5837e-70	4.6817e-69
K427_14180	napA	nitrate reductase	4078.97	166.237	4.6169	0	0
K427_14185	napD	nitrate reductase	13.6425	0	4.4351	0.00021709	0.00044608
K427_14190	napF	ferredoxin	210.263	42.1268	2.3194	1.3043e-27	7.1246e-27
K427_14200	eco	ecotin	486.63	233.211	1.0612	1.657e-20	7.5997e-20
K427_14220	alkB	alpha-ketoglutarate-dependent dioxygenase	11.5328	33.5501	-1.5406	0.00064198	0.0012405
K427_14340	gyrA	DNA gyrase subunit A	694.924	183.138	1.9239	7.0186e-69	7.1088e-68
K427_14365	nrdA	ribonucleotide-diphosphate reductase subunit alpha	442.608	37.7123	3.5529	8.4665e-86	9.8946e-85
K427_14375	nrdB	ribonucleotide-diphosphate reductase subunit beta	242.893	69.4965	1.8053	3.3559e-23	1.6547e-22
K427_14395	glpT	sn-glycerol-3-phosphate transporter	2921.89	1362.31	1.1008	6.9369e-122	1.0037e-120
K427_14555	menD	2-succinyl-5-enolpyruvyl-6-hydroxy-3-cyclohexene-1-carboxylate synthase	103.655	51.0818	1.0209	3.3971e-05	7.5829e-05
K427_14565	elaB	protein ElaB	127.424	1891.54	-3.8919	0	0
K427_14660	nuoC	NADH:ubiquinone oxidoreductase	828.255	357.825	1.2108	1.3126e-41	9.2484e-41
K427_14725	yfbV	hypothetical protein	160.616	566.441	-1.8183	9.0857e-56	7.8319e-55
K427_14745	pta	phosphate acetyltransferase	1580.7	367.663	2.1041	1.4559e-173	2.8087e-172
K427_14770	yfcG	GSH-dependent disulfide bond oxidoreductase	2.95353	17.4057	-2.559	0.00068032	0.0013084
K427_14795	hisP	amino acid transporter	15.0489	43.0097	-1.515	0.00013425	0.00028157
K427_14800	hisM	amino acid ABC transporter permease	4.50062	37.46	-3.0572	4.9898e-08	1.3815e-07
K427_14805	hisQ	amino acid ABC transporter permease	13.5019	80.3435	-2.573	2.462e-13	8.9193e-13
K427_14815	argT	hypothetical protein	328.827	768.12	-1.224	3.4779e-43	2.4793e-42
K427_14905	fabB	3-oxoacyl-ACP synthase	877.058	211.012	2.0553	2.8037e-94	3.4595e-93
K427_14945	prmB	SAM-dependent methyltransferase	92.8253	22.0724	2.0723	1.6248e-11	5.4705e-11
K427_14995	sixA	phosphohistidine phosphatase	247.253	842.535	-1.7687	3.903e-79	4.2931e-78
K427_15040	yfdC	membrane protein	7.87608	80.5958	-3.3552	8.2716e-17	3.368e-16
K427_15090	cutC	copper homeostasis protein CutC	73.1351	313.176	-2.0983	1.0905e-37	7.1647e-37
K427_15185	flhC	transcriptional regulator	63.4306	15.1354	2.0673	2.704e-08	7.6519e-08
K427_15190	flhD	transcriptional regulator	27.5663	5.92802	2.2173	0.00012612	0.00026522
K427_15205	otsA	trehalose-6-phosphate synthase	28.2695	220.093	-2.9608	9.677e-39	6.5342e-38
K427_15210	otsB	trehalose phosphatase	10.4077	205.21	-4.3014	3.2947e-47	2.5425e-46
K427_15280	ftnA	ferritin	1343.86	154.255	3.123	9.9743e-230	2.7243e-228
K427_15325	uvrC	excinuclease ABC subunit C	55.5545	23.9643	1.213	0.00045842	0.00090157
K427_15390	fliC	flagellin	355.549	45.0277	2.9812	1.5009e-59	1.3364e-58
K427_15395	fliD	flagellar capping protein	24.1908	6.18027	1.9687	0.00088873	0.0016852
K427_15410	amyA	cytoplasmic alpha-amylase	35.7237	223.751	-2.6469	2.4634e-35	1.5717e-34
K427_15420	yedE	hypothetical protein	72.0099	29.8923	1.2684	3.5318e-05	7.8548e-05
K427_15430	yedK	hypothetical protein	3.23482	15.6399	-2.2735	0.002608	0.0046073
K427_15450	ompN	porin	3129.62	196.129	3.9961	0	0
K427_15575	yodD	hypothetical protein	66.6654	2032.43	-4.9301	0	0
K427_15590	yedP	mannosyl-3-phosphoglycerate phosphatase	47.2565	676.551	-3.8396	6.7796e-142	1.106e-140
K427_16000	soxS	AraC family transcriptional regulator	8.01673	48.307	-2.5911	1.2101e-08	3.4978e-08
K427_16130	nac	nitrogen assimilation transcriptional regulator	7.5948	37.0816	-2.2876	3.2767e-06	8.0374e-06
K427_16205	ldtA	L%2CD-transpeptidase	41.2088	496.818	-3.5917	4.7538e-100	6.1467e-99
K427_16345	yeeA	membrane protein	15.4709	46.7935	-1.5968	3.5527e-05	7.8941e-05
K427_16350	sbmC	DNA gyrase inhibitor	20.956	54.7396	-1.3852	5.4444e-05	0.00011869
K427_16375	plaP	putrescine/spermidine ABC transporter	92.1221	5.4235	4.0862	5.4197e-21	2.5142e-20
K427_16390	yeeY	LysR family transcriptional regulator	66.3841	217.192	-1.7101	9.2862e-21	4.2752e-20
K427_16400	yoeB	toxin YoeB	10.8296	32.7933	-1.5984	0.00053232	0.001041
K427_16405	yefM	antitoxin YefM	38.9585	81.7309	-1.0689	5.2406e-05	0.00011456
K427_16435	hisC	histidinol-phosphate aminotransferase	64.8371	29.1356	1.154	0.0002794	0.00056597
K427_16440	hisB	imidazoleglycerol-phosphate dehydratase	83.4021	33.4239	1.3192	4.365e-06	1.0579e-05
K427_16455	hisF	imidazole glycerol phosphate synthase	66.6654	28.5049	1.2257	0.00010835	0.00022963
K427_16460	hisI	phosphoribosyl-ATP pyrophosphatase	110.968	41.2439	1.4279	1.7247e-08	4.9323e-08
K427_16565	wcaN	UTP--glucose-1-phosphate uridylyltransferase	79.0421	289.59	-1.8733	1.8049e-30	1.0522e-29
K427_16810	metN	DL-methionine transporter ATP-binding subunit	35.7237	77.1903	-1.1115	5.0553e-05	0.00011091
K427_16835	proS	proline--tRNA ligase	497.6	165.228	1.5905	2.1296e-38	1.4261e-37
K427_16885	ldcC	lysine decarboxylase LdcC	40.7869	174.183	-2.0944	1.1996e-21	5.6403e-21
K427_16955	dxr	1-deoxy-D-xylulose 5-phosphate reductoisomerase	113.5	254.779	-1.1666	2.0785e-14	7.8332e-14
K427_16970	tsf	elongation factor Ts	836.975	208.742	2.0035	4.0616e-87	4.8161e-86
K427_16975	rpsB	30S ribosomal protein S2	2979.55	964.501	1.6272	1.8544e-228	4.9537e-227
K427_17015	degP	serine endoprotease	745.978	262.094	1.509	1.5952e-52	1.3145e-51
K427_17020	dgt	deoxyguanosinetriphosphate triphosphohydrolase	83.2615	39.7303	1.0674	0.00011431	0.00024162
K427_17045	clcA	chloride channel protein	46.5533	117.173	-1.3317	9.8036e-09	2.8506e-08
K427_17070	fhuA	ferrichrome transporter	29.8166	117.299	-1.976	4.0388e-14	1.5081e-13
K427_17100	sfsA	transcriptional regulator	78.6202	254.148	-1.6927	1.0484e-23	5.2875e-23
K427_17115	pcnB	poly(A) polymerase I	134.878	43.7664	1.6238	7.4145e-12	2.5457e-11
K427_17245	gcd	glucose dehydrogenase	69.4783	484.332	-2.8014	8.3438e-79	9.0144e-78
K427_17250	cueO	multicopper oxidase	222.921	63.064	1.8216	1.1202e-21	5.2875e-21
K427_17260	speE	spermidine synthase	167.789	65.3343	1.3607	2.4446e-11	8.1739e-11
K427_17265	speD	S-adenosylmethionine decarboxylase	138.957	28.3788	2.2917	1.5376e-18	6.7105e-18
K427_17280	acnB	bifunctional aconitate hydratase 2/2-methylisocitrate dehydratase	6309.31	3113.47	1.019	1.1038e-229	2.9812e-228
K427_17300	lpd	dihydrolipoamide dehydrogenase	2834.69	1187.24	1.2556	2.3588e-146	3.9819e-145
K427_17310	aceF	pyruvate dehydrogenase	2770.55	1179.68	1.2318	8.7226e-139	1.4042e-137
K427_17315	aceE	pyruvate dehydrogenase	3631.58	1130.74	1.6833	4.2454e-292	1.5877e-290
K427_17375	guaC	guanosine 5'-monophosphate oxidoreductase	257.379	57.3882	2.1651	8.305e-31	4.8646e-30
K427_17570	leuA	2-isopropylmalate synthase	26.0192	87.5328	-1.7502	1.675e-09	5.0642e-09
K427_17610	thiB	thiamine ABC transporter substrate-binding protein	94.513	35.8204	1.3997	3.0081e-07	8.0179e-07
K427_17625	yabI	membrane protein	17.018	43.7664	-1.3628	0.00036366	0.00072756
K427_17750	folA	dihydrofolate reductase	17.7212	118.434	-2.7405	3.9267e-20	1.7875e-19
K427_17880	rihC	ribonucleoside hydrolase	58.0861	13.1173	2.1467	4.978e-08	1.3798e-07
K427_17900	ileS	isoleucine--tRNA ligase	1099.28	492.908	1.1572	7.2682e-51	5.831e-50
K427_17930	nhaA	pH-dependent sodium/proton antiporter	136.284	774.048	-2.5058	4.0009e-111	5.4333e-110
K427_18015	talB	transaldolase	2289.69	808.607	1.5016	2.7644e-156	4.8695e-155
K427_18085	arcA	TorR family transcriptional regulator	1303.07	3171.24	-1.2831	2.1611e-185	4.4901e-184
K427_18145	yjjK	ABC transporter ATP-binding protein	426.012	173.426	1.2966	1.3124e-24	6.7304e-24
K427_18180	lplA	lipoate--protein ligase	74.1196	26.4869	1.4846	2.0618e-06	5.1586e-06
K427_18220	yjjI	hypothetical protein	277.632	71.1362	1.9645	2.482e-29	1.4064e-28
K427_18255	osmY	hypothetical protein	398.586	5260.29	-3.7222	0	0
K427_18260	prfC	peptide chain release factor 3	145.004	40.2348	1.8496	6.3528e-15	2.4281e-14
K427_18310	fusA	elongation factor G	7832.77	2603.28	1.5892	0	0
K427_18315	rpsG	30S ribosomal protein S7	585.081	131.047	2.1586	1.4731e-67	1.4381e-66
K427_18320	rpsL	30S ribosomal protein S12	565.39	112.002	2.3357	6.4699e-72	6.75e-71
K427_18345	fkpA	peptidylprolyl isomerase	455.828	218.706	1.0595	2.9213e-19	1.3006e-18
K427_18375	yheS	ABC transporter ATP-binding protein	69.9003	34.5591	1.0162	0.00069751	0.0013403
K427_18425	fic	cell filamentation protein Fic	32.4888	291.734	-3.1666	6.6558e-54	5.5983e-53
K427_18455	nirB	nitrite reductase	386.069	36.9555	3.385	3.0237e-72	3.1682e-71
K427_18530	trpS	tryptophanyl-tRNA synthetase	335.296	155.516	1.1084	1.334e-15	5.1967e-15
K427_18535	gph	phosphoglycolate phosphatase	69.197	31.7843	1.1224	0.00024415	0.00049748
K427_18540	rpe	ribulose-phosphate 3-epimerase	68.3532	28.5049	1.2618	5.9999e-05	0.0001301
K427_18600	mrcA	penicillin-binding protein 1A	45.4281	15.0092	1.5977	8.5737e-05	0.00018362
K427_18645	yhgE	membrane protein	29.3947	73.1542	-1.3154	7.1521e-06	1.7028e-05
K427_18660	pck	phosphoenolpyruvate carboxykinase	6054.6	2344.22	1.3689	0	0
K427_18680	yhgF	transcription accessory protein	186.635	42.0006	2.1517	1.2697e-22	6.1603e-22
K427_18690	feoA	ferrous iron transporter A	27.9882	56.8837	-1.0232	0.0011163	0.0020761
K427_18695	feoB	ferrous iron transporter B	453.297	1189.64	-1.392	1.4252e-79	1.5819e-78
K427_18700	feoC	ferrous iron transporter C	21.0967	47.4241	-1.1686	0.00095691	0.0018046
K427_18725	nfuA	Fe/S biogenesis protein NfuA	122.642	275.464	-1.1674	1.7976e-15	6.9692e-15
K427_18750	malP	maltose phosphorylase	318.841	104.434	1.6102	1.2272e-25	6.4712e-25
K427_18945	gntR	transcriptional regulator	59.6332	260.707	-2.1282	3.4457e-32	2.0631e-31
K427_18970	yhhY	acetyltransferase	29.676	6.18027	2.2636	5.5872e-05	0.0001217
K427_18975	ggt	gamma-glutamyltranspeptidase	55.2732	146.308	-1.4044	2.6442e-11	8.7929e-11
K427_18985	yhhA	hypothetical protein	134.175	1267.46	-3.2398	2.2692e-232	6.2683e-231
K427_18990	ugpQ	glycerophosphodiester phosphodiesterase	43.4591	97.1186	-1.1601	2.6018e-06	6.4537e-06
K427_18995	ugpC	glycerol-3-phosphate transporter ATP-binding subunit	28.4102	92.0734	-1.6964	1.4482e-09	4.4005e-09
K427_19000	ugpE	glycerol-3-phosphate transporter membrane protein	3.93804	24.0904	-2.6129	5.2961e-05	0.00011567
K427_19005	ugpA	glycerol-3-phosphate transporter permease	5.34449	40.4871	-2.9213	2.9008e-08	8.1993e-08
K427_19010	ugpB	glycerol-3-phosphate ABC transporter substrate-binding protein	135.862	907.239	-2.7393	1.0717e-142	1.7602e-141
K427_19085	rpoH	RNA polymerase factor sigma-32	704.488	1462.45	-1.0537	2.9457e-64	2.7862e-63
K427_19110	rsmD	16S rRNA methyltransferase	43.5998	102.542	-1.2338	4.1129e-07	1.0891e-06
K427_19150	dcrB	hypothetical protein	689.017	1460.06	-1.0834	6.0975e-67	5.9288e-66
K427_19160	yhhT	permease	9.00124	40.361	-2.1648	2.6583e-06	6.5804e-06
K427_19170	nikA	nickel ABC transporter substrate-binding protein	327.279	22.5769	3.8576	8.7545e-68	8.6507e-67
K427_19175	nikB	nickel transporter permease NikB	27.4257	2.2703	3.5946	9.1792e-07	2.3662e-06
K427_19180	nikC	nickel transporter permease NikC	33.614	5.4235	2.6318	2.7763e-06	6.8654e-06
K427_19185	nikD	nickel ABC transporter ATP-binding protein	30.8011	5.17125	2.5744	9.3684e-06	2.211e-05
K427_19190	nikE	nickel ABC transporter ATP-binding protein	41.2088	4.79286	3.104	1.6119e-08	4.6314e-08
K427_19195	nikR	nickel responsive regulator	29.9573	3.78384	2.985	2.2825e-06	5.6848e-06
K427_19210	gatA	PTS suar transporter subunit IIA	18.0025	41.7484	-1.2135	0.0014218	0.0026064
K427_19265	yhiM	membrane protein	4.21933	106.704	-4.6605	3.3502e-26	1.7938e-25
K427_19275	pitA	phosphate transporter PitA	280.023	127.768	1.132	1.0657e-13	3.919e-13
K427_19280	uspB	universal stress protein UspB	103.514	1419.7	-3.7777	2.2406e-292	8.5102e-291
K427_19305	dtpB	peptide ABC transporter permease	2317.82	676.172	1.7773	4.7446e-202	1.0581e-200
K427_19320	rlmJ	hypothetical protein	50.4913	173.3	-1.7792	9.9408e-18	4.2025e-17
K427_19380	dctR	LuxR family transcriptional regulator	2.81289	66.8478	-4.5708	6.843e-17	2.8004e-16
K427_19415	hemN	coproporphyrinogen III oxidase	0	16.1444	-5.2579	2.8291e-05	6.4032e-05
K427_19425	--	hypothetical protein	4.07869	29.6401	-2.8614	2.6206e-06	6.4937e-06
K427_19445	hdeB	acid-resistance protein	297.603	2804.2	-3.2361	0	0
K427_19450	hdeA	acid-resistance protein	571.297	7784.62	-3.7683	0	0
K427_19460	hdeD	acid-resistance membrane protein	28.2695	946.717	-5.0656	6.3821e-224	1.633e-222
K427_19465	gadE	LuxR family transcriptional regulator	43.4591	819.58	-4.2372	1.4993e-181	3.0371e-180
K427_19475	mdtE	multidrug transporter	26.3005	116.542	-2.1477	2.0124e-15	7.7897e-15
K427_19480	mdtF	multidrug transporter	108.156	851.995	-2.9777	1.7083e-145	2.8638e-144
K427_19490	gadW	AraC family transcriptional regulator	7.87608	79.2084	-3.3301	1.8745e-16	7.5316e-16
K427_19505	gadX	transcriptional regulator	23.4876	260.454	-3.4711	5.1885e-52	4.2466e-51
K427_19515	gadB	glutamate decarboxylase	12.9393	168.129	-3.6997	9.1557e-36	5.8878e-35
K427_19520	--	-	12.3767	1.51354	3.0316	0.0022043	0.0039429
K427_19635	pdxK	pyridoxal kinase	91.1376	40.2348	1.1796	1.1514e-05	2.6938e-05
K427_19650	cysA	sulfate/thiosulfate transporter subunit	38.1146	118.56	-1.6372	2.1084e-11	7.0789e-11
K427_19655	cysW	sulfate/thiosulfate transporter permease subunit	12.2361	65.9649	-2.4306	1.2998e-10	4.163e-10
K427_19660	cysU	sulfate/thiosulfate transporter subunit	5.48513	37.5861	-2.7766	1.8699e-07	5.0449e-07
K427_19665	cysP	thiosulfate transporter subunit	37.974	77.0642	-1.021	0.00015216	0.00031667
K427_19700	yfeX	peroxidase	225.875	90.3077	1.3226	3.5984e-14	1.3457e-13
K427_19750	eutC	ethanolamine ammonia-lyase	43.4591	18.0363	1.2688	0.0013096	0.0024098
K427_19755	eutB	ethanolamine ammonia-lyase	60.899	17.5318	1.7964	7.4022e-07	1.9183e-06
K427_19765	eutH	ethanolamine utilization protein EutH	28.4102	7.69381	1.8846	0.00047197	0.00092748
K427_19780	eutG	ethanolamine utilization protein EutG	39.8024	5.80189	2.7783	1.5047e-07	4.0821e-07
K427_19785	eutJ	ethanolamine utilization protein EutJ	12.3767	1.51354	3.0316	0.0022043	0.0039429
K427_19790	eutE	aldehyde dehydrogenase	38.5366	3.90997	3.301	1.9326e-08	5.5074e-08
K427_19800	eutM	carboxysome structural protein EutM	44.0217	13.8741	1.6658	6.6902e-05	0.0001443
K427_19805	eutD	phosphotransacetylase	34.0359	5.54963	2.6166	2.5904e-06	6.4319e-06
K427_19810	eutT	ethanolamine utilization cobalamin adenosyltransferase	46.1314	11.6038	1.9912	3.7507e-06	9.1724e-06
K427_19815	eutQ	ethanolamine utilization protein EutQ	46.6939	5.54963	3.0728	2.1683e-09	6.5071e-09
K427_19820	eutP	ethanolamine utilization protein EutP	16.1741	3.1532	2.3588	0.0022813	0.0040746
K427_19835	maeB	malic enzyme	1828.1	754.624	1.2765	1.565e-97	1.9814e-96
K427_19845	talA	transaldolase	41.3494	445.106	-3.4282	9.5018e-87	1.1212e-85
K427_19850	tktB	transketolase	132.346	722.84	-2.4494	2.4545e-101	3.2078e-100
K427_19860	ypfG	hypothetical protein	30.3792	155.516	-2.3559	3.2027e-22	1.5416e-21
K427_19870	aegA	(Fe-S)-binding protein	418.417	81.8571	2.3538	3.5217e-54	2.9725e-53
K427_19910	ypfN	hypothetical protein	22.925	110.614	-2.2705	1.2409e-15	4.8416e-15
K427_19925	ypfJ	hypothetical protein	69.9003	208.742	-1.5784	4.6269e-18	1.9836e-17
K427_19990	uraA	uracil transporter	34.0359	3.78384	3.1691	2.1718e-07	5.8272e-07
K427_19995	upp	uracil phosphoribosyltransferase	132.768	21.0634	2.6561	7.8138e-21	3.611e-20
K427_20075	guaA	GMP synthase	403.79	134.2	1.5892	1.9256e-31	1.1444e-30
K427_20140	rodZ	cytoskeletal protein RodZ	247.815	686.767	-1.4706	1.8894e-50	1.5059e-49
K427_20235	iscR	transcriptional regulator	89.5905	238.508	-1.4126	1.2638e-17	5.3152e-17
K427_20250	trmJ	tRNA (cytidine/uridine-2'-O-)-methyltransferase	81.5737	235.229	-1.5279	2.5852e-19	1.1531e-18
K427_20260	suhB	inositol monophosphatase	24.6128	2.64869	3.2161	9.0802e-06	2.1471e-05
K427_20270	csiE	stationary phase inducible protein CsiE	478.613	2524.07	-2.3988	0	0
K427_20290	yphA	membrane protein	12.9393	67.3524	-2.38	1.3909e-10	4.4429e-10
K427_20335	glyA	serine hydroxymethyltransferase	1376.91	294.635	2.2244	1.965e-162	3.5914e-161
K427_20345	hmp	dihydropteridine reductase	136.566	35.3158	1.9512	4.1776e-15	1.6017e-14
K427_20355	glrR	response regulator GlrR	61.4616	30.2707	1.0218	0.0014029	0.0025737
K427_20385	purL	phosphoribosylformylglycinamidine synthase	115.61	44.5232	1.3766	2.2347e-08	6.3608e-08
K427_20410	pgpC	hypothetical protein	35.4424	93.9654	-1.4067	8.9045e-08	2.4321e-07
K427_20450	pdxJ	pyridoxine 5'-phosphate synthase	134.737	65.0821	1.0498	1.3021e-06	3.304e-06
K427_20465	rnc	ribonuclease III	32.0669	134.452	-2.0679	8.023e-17	3.2778e-16
K427_20495	rseA	anti-RNA polymerase sigma factor SigE	625.305	1993.71	-1.6728	2.9071e-171	5.5208e-170
K427_20500	rpoE	RNA polymerase sigma factor RpoE	246.831	1140.58	-2.2082	6.6527e-141	1.0781e-139
K427_20525	srmB	ATP-dependent RNA helicase SrmB	194.089	62.5595	1.6334	1.5503e-16	6.2706e-16
K427_20555	yfiF	methyltransferase	193.245	67.8569	1.5099	8.1805e-15	3.1169e-14
K427_20685	yaiA	hypothetical protein	6.18835	88.7941	-3.8428	3.944e-20	1.792e-19
K427_20690	aroL	shikimate kinase	33.4734	67.3524	-1.0087	0.00045364	0.00089435
K427_20695	yaiI	hypothetical protein	9.98575	55.4963	-2.4744	2.6028e-09	7.7823e-09
K427_20710	psiF	hypothetical protein	15.6115	110.236	-2.8199	2.3471e-19	1.0488e-18
K427_20725	iraP	anti-RssB factor	45.7094	104.56	-1.1938	6.1764e-07	1.6127e-06
K427_20745	yaiZ	membrane protein	30.0979	104.056	-1.7896	2.5496e-11	8.5016e-11
K427_20865	yaiO	membrane protein	5.0632	20.685	-2.0305	0.0012375	0.0022859
K427_20875	frmA	S-(hydroxymethyl)glutathione dehydrogenase	107.593	46.289	1.2168	1.014e-06	2.5974e-06
K427_20900	lacI	lac repressor	51.0539	21.5679	1.2431	0.00061126	0.0011849
K427_20920	codA	cytosine deaminase	85.7931	33.5501	1.3545	1.9647e-06	4.9338e-06
K427_20945	prpD	2-methylcitrate dehydratase	9.42317	346.6	-5.2009	1.1122e-83	1.2874e-82
K427_20950	prpC	methylcitrate synthase	5.0632	209.372	-5.3699	1.589e-51	1.2962e-50
K427_20955	prpB	2-methylisocitrate lyase	2.39095	88.4157	-5.2086	1.2432e-22	6.0442e-22
K427_20970	yahO	hypothetical protein	70.8848	592.676	-3.0637	1.7181e-104	2.3074e-103
K427_21005	rbsC	sugar ABC transporter permease	39.0991	81.3526	-1.0571	6.3396e-05	0.0001371
K427_21095	betT	choline transporter	183.119	378.51	-1.0476	1.0606e-17	4.4758e-17
K427_21150	ypjA	autotransporter	298.025	55.2441	2.4315	1.4111e-40	9.8005e-40
K427_21165	ykgG	hypothetical protein	271.866	6.55866	5.3733	5.7827e-65	5.5342e-64
K427_21170	ykgF	amino acid dehydrogenase	1117.28	26.2346	5.4124	3.432e-261	1.03e-259
K427_21175	ykgE	hypothetical protein	302.245	7.69381	5.2959	7.4916e-72	7.7824e-71
K427_21365	yagU	membrane protein	17.1586	39.0997	-1.1882	0.0023832	0.0042385
K427_21670	pepD	aminoacyl-histidine dipeptidase	1112.78	371.573	1.5824	4.677e-83	5.3376e-82
K427_21730	yafK	transpeptidase	33.614	10.4686	1.683	0.00044797	0.0008846
K427_22065	ahr	alcohol dehydrogenase	24.7534	74.92	-1.5977	1.6571e-07	4.4906e-07
K427_22095	yjgR	hypothetical protein	21.2373	47.5503	-1.1629	0.00098531	0.0018553
K427_22105	lptF	lipopolysaccharide ABC transporter permease	32.0669	64.8298	-1.0156	0.0005421	0.0010576
K427_22130	valS	valyl-tRNA synthase	818.832	334.239	1.2927	1.5211e-45	1.1273e-44
K427_22205	pyrB	aspartate carbamoyltransferase catalytic subunit	45.1468	7.44155	2.6009	6.816e-08	1.8743e-07
K427_22210	pyrI	aspartate carbamoyltransferase regulatory subunit	33.0514	8.5767	1.9462	0.00011583	0.00024442
K427_22230	mgtA	magnesium ABC transporter ATPase	109.984	26.9914	2.0267	4.9805e-13	1.783e-12
K427_22245	treB	PTS system trehalose(maltose)-specific transporter subunits IIBC	31.3637	598.73	-4.2547	1.8944e-133	2.9519e-132
K427_22250	treC	trehalose-6-phosphate hydrolase	28.4102	94.8483	-1.7392	4.2007e-10	1.3108e-09
K427_22265	nrdD	ribonucleoside-triphosphate reductase	610.397	253.896	1.2655	2.7205e-33	1.6827e-32
K427_22275	nrdG	ribonucleoside-triphosphate reductase	33.614	9.96411	1.7542	0.0002987	0.00060458
K427_22290	yjgA	hypothetical protein	74.5415	250.869	-1.7508	1.8793e-24	9.5972e-24
K427_22310	yjfF	ABC transporter permease	8.8606	28.0004	-1.66	0.0010141	0.0019035
K427_22320	ytfR	sugar ABC transporter ATP-binding protein	19.6902	45.4061	-1.2054	0.00093314	0.0017652
K427_22395	ytfK	hypothetical protein	599.145	2212.41	-1.8846	1.1784e-222	2.9531e-221
K427_22405	cysQ	adenosine-3'(2')%2C5'-bisphosphate nucleotidase	235.439	1189.64	-2.3371	5.7065e-157	1.0275e-155
K427_22410	cpdB	2'%2C 3'-cyclic nucleotide 2'-phosphodiesterase	369.895	93.4609	1.9847	5.0046e-39	3.3887e-38
K427_22465	fklB	peptidylprolyl isomerase	45.2875	12.9912	1.8016	1.8888e-05	4.352e-05
K427_22540	rplI	50S ribosomal protein L9	1004.06	258.184	1.9594	4.0039e-101	5.2047e-100
K427_22545	rpsR	30S ribosomal protein S18	94.513	18.4147	2.3597	1.6208e-13	5.8893e-13
K427_22550	priB	primosomal replication protein N	228.266	46.6674	2.2902	2.1239e-29	1.2091e-28
K427_22555	rpsF	30S ribosomal protein S6	1320.23	260.202	2.3431	5.1448e-166	9.6202e-165
K427_22565	yjfY	membrane protein	3.09418	31.6581	-3.3549	1.8003e-07	4.8678e-07
K427_22615	bsmA	biofilm stress and motility protein A	1374.38	7280.23	-2.4052	0	0
K427_22625	yjfN	hypothetical protein	242.049	2173.56	-3.1667	0	0
K427_22630	aidB	isovaleryl-CoA dehydrogenase	27.5663	556.729	-4.336	2.2094e-125	3.3567e-124
K427_22720	miaA	tRNA delta(2)-isopentenylpyrophosphate transferase	443.733	921.743	-1.0547	3.3621e-41	2.3552e-40
K427_22740	nnr	carbohydrate kinase	69.197	168.633	-1.2851	2.1197e-11	7.1072e-11
K427_22775	sbcC	exonuclease SbcC	116.032	51.8386	1.1624	1.0074e-06	2.583e-06
K427_22815	brnQ	branched-chain amino acid ABC transporter substrate-binding protein	129.955	419.628	-1.6911	5.174e-38	3.4364e-37
K427_22850	tgt	queuine tRNA-ribosyltransferase	84.6679	26.613	1.6697	3.0457e-08	8.5789e-08
K427_22860	secD	preprotein translocase subunit SecD	167.226	83.1184	1.0086	1.8825e-07	5.0733e-07
K427_22875	tsx	nucleoside-specific channel-forming protein Tsx	331.78	103.425	1.6816	2.9888e-28	1.6587e-27
K427_22880	yajI	hypothetical protein	57.2423	216.057	-1.9163	8.4578e-24	4.2833e-23
K427_22920	yajO	oxidoreductase	216.311	597.342	-1.4655	6.7688e-44	4.9116e-43
K427_22930	ispA	geranyl transferase	50.9133	168.633	-1.7278	1.1176e-16	4.5353e-16
K427_22945	thiI	tRNA s(4)U8 sulfurtransferase	40.7869	13.2434	1.6228	0.00016664	0.00034593
K427_22950	yajL	oxidative-stress-resistance chaperone	57.1016	119.695	-1.0678	1.0059e-06	2.5819e-06
K427_22955	panE	2-dehydropantoate 2-reductase	95.9195	325.915	-1.7646	1.3644e-31	8.1289e-31
K427_22995	cyoB	cytochrome o ubiquinol oxidase subunit I	1210.1	587.378	1.0428	3.5535e-47	2.7335e-46
K427_23030	bolA	transcriptional regulator BolA	233.329	1756.58	-2.9123	1.2807e-291	4.717e-290
K427_23040	tig	trigger factor	1224.45	192.85	2.6666	1.1966e-178	2.3843e-177
K427_23050	clpX	Clp protease ClpX	1037.11	2319.87	-1.1615	3.7709e-117	5.2681e-116
K427_23115	ybaO	transcriptional regulator	27.1444	60.7937	-1.1633	0.00019424	0.00040081
K427_23120	mdlA	multidrug ABC transporter ATP-binding protein	30.5198	70.8839	-1.2157	3.1451e-05	7.0529e-05
K427_23140	amtB	ammonium transporter	12.9393	65.9649	-2.3499	2.9001e-10	9.073e-10
K427_23155	ybaY	hypothetical protein	128.549	1437.48	-3.4832	3.3544e-279	1.1019e-277
K427_23160	ybaZ	cysteine methyltransferase	46.9752	215.805	-2.1998	5.6502e-28	3.1145e-27
K427_23165	ybaA	hypothetical protein	4.92255	116.038	-4.559	4.0292e-28	2.2311e-27
K427_23175	ylaC	membrane protein	188.604	33.4239	2.4964	4.5565e-27	2.4724e-26
K427_23280	adk	adenylate kinase	54.8513	12.2344	2.1646	1.0024e-07	2.7348e-07
K427_23290	hemH	ferrochelatase	36.2862	75.6768	-1.0604	0.00010997	0.00023286
K427_23300	gsk	guanosine kinase	56.539	10.7209	2.3988	8.303e-09	2.423e-08
K427_23345	--	hypothetical protein	19.5496	54.8657	-1.4888	2.0541e-05	4.7149e-05
K427_23350	ybaQ	XRE family transcriptional regulator	43.7404	90.0554	-1.0418	3.1772e-05	7.1116e-05
K427_23355	copA	copper-transporting ATPase	3981.64	819.706	2.2802	0	0
K427_23360	glsA	glutaminase	9.56382	174.687	-4.191	6.2136e-40	4.291e-39
K427_23365	ybaT	amino acid permease	26.0192	748.57	-4.8465	2.1244e-175	4.1985e-174
K427_23380	ybbJ	membrane protein	65.3996	170.651	-1.3837	1.0788e-12	3.7952e-12
K427_23435	allS	transcriptional regulator	40.3649	3.90997	3.3679	6.6476e-09	1.9446e-08
K427_23440	allA	ureidoglycolate hydrolase	33.614	0	7.058	4.1373e-09	1.2265e-08
K427_23445	allR	transcriptional regulator	365.113	1110.18	-1.6044	7.4047e-91	8.955e-90
K427_23450	gcl	glyoxylate carboligase	2284.63	3.78384	9.2379	0	0
K427_23455	hyi	hydroxypyruvate isomerase	716.161	0	12.471	7.558e-79	8.202e-78
K427_23460	glxR	tartronate semialdehyde reductase	3350.71	1.76579	10.89	0	0
K427_23470	ybbW	allantoin permease	282.976	3.02707	6.5466	6.5189e-67	6.3133e-66
K427_23475	allB	allantoinase	18538.1	58.0189	8.3198	0	0
K427_23480	ybbY	uracil/xanthine transporter	62.7274	4.16222	3.9137	1.9683e-14	7.4295e-14
K427_23485	glxK	glycerate kinase	70.7441	4.79286	3.8837	5.2203e-16	2.0803e-15
K427_23495	allE	hypothetical protein	73.9789	20.685	1.8385	2.928e-08	8.2666e-08
K427_23500	allC	allantoate amidohydrolase	51.4758	7.69381	2.7421	3.0068e-09	8.9682e-09
K427_23505	allD	ureidoglycolate dehydrogenase	41.7714	4.41448	3.2422	6.5267e-09	1.9138e-08
K427_23555	btuB	vitamin B12/cobalamin outer membrane transporter	320.388	52.7215	2.6034	6.6397e-47	5.0915e-46
K427_23590	oxyR	transcriptional regulator	587.19	236.868	1.3097	8.2833e-34	5.1762e-33
K427_23610	argH	argininosuccinate lyase	57.6642	131.678	-1.1913	2.3248e-08	6.6019e-08
K427_23615	argB	acetylglutamate kinase	9.28253	42.8835	-2.2078	9.6613e-07	2.4852e-06
K427_23645	eptC	hypothetical protein	348.235	80.9742	2.1045	1.1385e-39	7.8176e-39
K427_23690	fsaB	fructose-6-phosphate aldolase	161.6	56.7576	1.5095	1.2533e-12	4.3961e-12
K427_23695	gldA	glycerol dehydrogenase	2031.47	755.255	1.4275	1.215e-128	1.8692e-127
K427_23720	katG	peroxidase	4947.73	2032.68	1.2834	2.8098e-263	8.5377e-262
K427_23795	metJ	transcriptional repressor protein MetJ	23.0657	88.7941	-1.9447	7.5198e-11	2.447e-10
K427_23845	hslV	ATP-dependent protease subunit HslV	27.0037	180.363	-2.7397	8.3778e-30	4.8373e-29
K427_23860	rraA	ribonuclease activity regulator protein RraA	466.377	1684.94	-1.8531	2.535e-166	4.777e-165
K427_23965	cpxP	periplasmic repressor CpxP	852.867	2947.11	-1.7889	2.6714e-276	8.6584e-275
K427_24005	sodA	superoxide dismutase	239.236	510.945	-1.0947	6.6488e-25	3.4242e-24
K427_24125	--	hypothetical protein	23.347	77.6949	-1.7346	1.6701e-08	4.7875e-08
K427_24130	--	hypothetical protein	13.7831	39.8565	-1.5319	0.00021117	0.00043429
K427_24135	yiaG	Cro/Cl family transcriptional regulator	13.5019	36.451	-1.4328	0.00073546	0.0014066
K427_24255	glnA	glutamine synthetase	1397.44	8624	-2.6256	0	0
K427_24265	glnL	nitrogen regulation protein NR(II)	43.881	169.516	-1.9498	2.0608e-19	9.2254e-19
K427_24285	hemN	coproporphyrinogen III oxidase	368.488	173.552	1.0862	1.7594e-16	7.0924e-16
K427_24295	yihI	GTPase activator	75.8073	193.48	-1.3518	9.2431e-14	3.4043e-13
K427_24360	dsbA	protein disulfide isomerase	156.537	78.0732	1.0036	5.1652e-07	1.3544e-06
K427_24400	yhjA	cytochrome C peroxidase	56.961	8.19832	2.7966	2.8873e-10	9.0446e-10
K427_24410	treF	trehalase	92.1221	328.311	-1.8334	2.1123e-33	1.3098e-32
K427_24430	yhjD	membrane protein	24.0502	292.617	-3.6049	7.5087e-60	6.7105e-59
K427_24455	yhjG	hypothetical protein	20.1121	116.795	-2.5378	1.9389e-18	8.4164e-18
K427_24475	kdgK	ketodeoxygluconokinase	87.1995	28.1265	1.6324	3.2245e-08	9.0615e-08
K427_24520	--	cell division protein	23.0657	48.0548	-1.0589	0.0020811	0.0037418
K427_24525	yhjR	hypothetical protein	6.89157	42.2529	-2.6161	8.469e-08	2.3183e-07
K427_24660	yhjY	hypothetical protein	12.658	72.902	-2.5259	5.0714e-12	1.7486e-11
K427_24680	yiaD	membrane protein	21.2373	2.52256	3.0736	5.423e-05	0.00011833
K427_24690	ghrB	bifunctional glyoxylate/hydroxypyruvate reductase B	245.987	44.5232	2.466	2.5187e-34	1.5944e-33
K427_24705	yiaG	transcriptional regulator	27.1444	424.295	-3.9663	1.5559e-91	1.8911e-90
K427_24760	glyS	glycyl-tRNA ligase	826.708	233.967	1.8211	9.2496e-76	9.7759e-75
K427_24795	xylA	xylose isomerase	22.5031	59.5324	-1.4036	2.1408e-05	4.9002e-05
K427_24825	bax	hypothetical protein	374.255	799.525	-1.0951	4.7198e-38	3.1433e-37
K427_24850	avtA	valine--pyruvate aminotransferase	76.5105	38.0907	1.0062	0.00043585	0.00086278
K427_24875	yiaK	2%2C3-diketo-L-gulonate reductase	48.1004	12.7389	1.9168	4.1778e-06	1.0186e-05
K427_24930	aldB	aldehyde dehydrogenase	101.967	585.486	-2.5215	4.3252e-85	5.0306e-84
K427_24950	yibF	glutathione S-transferase	16.8773	67.1001	-1.9912	9.146e-09	2.6626e-08
K427_25000	yibT	hypothetical protein	103.374	879.995	-3.0896	2.2359e-155	3.9102e-154
K427_25040	yjcO	hypothetical protein	81.2924	38.8474	1.0653	0.00014136	0.00029571
K427_25065	ddpA	ABC transporter substrate-binding protein	246.69	114.272	1.1102	6.695e-12	2.3019e-11
K427_25070	fdhF	formate dehydrogenase	471.299	197.895	1.2519	1.1644e-25	6.153e-25
K427_25075	fdhF	spermidine/putrescine ABC transporter substrate-binding protein	72.5725	30.6491	1.2436	4.378e-05	9.666e-05
K427_25265	yjdN	hypothetical protein	5.76642	39.8565	-2.7891	7.4847e-08	2.0558e-07
K427_25290	proP	glycine/betaine ABC transporter	122.783	300.437	-1.291	2.9464e-19	1.3094e-18
K427_25320	adiY	transcriptional regulator	62.3055	2.2703	4.7784	9.9699e-16	3.9279e-15
K427_25375	fumB	fumarate hydratase	76.7918	14.8831	2.3673	2.6954e-11	8.951e-11
K427_25440	lysU	lysine--tRNA ligase	1557.5	353.537	2.1393	1.0514e-174	2.0612e-173
K427_25520	fxsA	phage T7 F exclusion suppressor FxsA	11.3922	65.2082	-2.517	7.201e-11	2.3528e-10
K427_25540	groL	molecular chaperone GroEL	3821.45	1201.12	1.6697	1.0266e-303	4.1593e-302
K427_25585	ecnB	entericidin B membrane lipoprotein	10.4077	142.651	-3.7768	5.1507e-31	3.0316e-30
K427_25590	sugE	multidrug transporter	11.6735	35.3158	-1.5971	0.00032741	0.00065885
K427_25595	blc	membrane protein	42.334	424.925	-3.3273	5.8382e-81	6.51e-80
K427_25695	metA	homoserine O-succinyltransferase	8.15737	27.7482	-1.7662	0.00064004	0.0012377
K427_25700	aceB	malate synthase	473.831	62.6856	2.9182	3.9729e-77	4.2544e-76
K427_25705	aceA	isocitrate lyase	1970.85	196.507	3.3262	0	0
K427_25715	aceK	isocitrate dehydrogenase	261.739	55.6225	2.2344	1.6648e-32	1.0117e-31
K427_25720	iclR	transcriptional repressor IclR	73.6977	14.6308	2.3326	9.8875e-11	3.1919e-10
K427_25740	yjbB	membrane protein	30.2385	257.553	-3.0904	8.4127e-47	6.4107e-46
K427_25750	pepE	(alpha)-aspartyl dipeptidase	150.349	50.9557	1.561	2.173e-12	7.557e-12
K427_25900	malE	sugar ABC transporter substrate-binding protein	1290.13	176.831	2.8671	5.0491e-203	1.1471e-201
K427_25910	malK	maltose/maltodextrin transporter ATP-binding protein	274.116	44.6493	2.6181	1.2577e-40	8.7601e-40
K427_25915	lamB	maltoporin	2175.63	429.97	2.3391	9.0628e-272	2.8244e-270
K427_25925	malM	maltose-binding protein	411.385	135.588	1.6013	2.415e-32	1.4531e-31
K427_25975	yjbJ	hypothetical protein	168.211	4392.28	-4.7066	0	0
K427_26015	tyrB	aromatic amino acid aminotransferase	184.807	60.2892	1.616	1.3541e-15	5.2666e-15
K427_26075	aphA	acid phosphatase	294.791	40.4871	2.8642	8.7066e-48	6.7403e-47
K427_26115	yjcC	membrane protein	28.5508	86.3977	-1.5975	1.9072e-08	5.4414e-08
K427_26175	actP	acetate permease	128.408	662.172	-2.3665	1.7536e-89	2.1103e-88
K427_26180	yjcH	membrane protein	23.2063	125.245	-2.4322	8.0322e-19	3.5244e-18
K427_26190	acs	acetyl-CoA synthetase	530.37	1235.68	-1.2202	4.3834e-68	4.3491e-67
K427_26205	nrfA	cytochrome C nitrite reductase	1214.89	13.748	6.4655	1.1305e-281	3.9258e-280
K427_26210	nrfB	cytochrome C nitrite reductase	205.2	4.0361	5.6679	9.9835e-50	7.8793e-49
K427_26215	nrfC	nitrite reductase	129.533	4.0361	5.0042	2.0543e-31	1.2179e-30
K427_26220	nrfD	nitrite reductase	206.325	3.1532	6.032	6.1151e-50	4.842e-49
K427_26245	gltP	glutamate:protein symporter	71.8693	14.5047	2.3089	2.1798e-10	6.8994e-10
K427_26370	--	acetolactate synthase	132.206	46.6674	1.5023	1.5758e-10	5.0205e-10
K427_26450	metR	transcriptional regulator	15.1896	37.9645	-1.3216	0.0011734	0.0021773
K427_26460	metE	5-methyltetrahydropteroyltriglutamate--homocysteine methyltransferase	32.6295	166.237	-2.349	1.4437e-23	7.2361e-23
K427_26605	rfaH	transcriptional regulator	14.7677	43.388	-1.5549	9.3378e-05	0.00019911
K427_26630	fadA	3-ketoacyl-CoA thiolase	121.657	314.816	-1.3717	7.3341e-22	3.4957e-21
K427_26635	fadB	multifunctional fatty acid oxidation complex subunit alpha	776.638	383.051	1.0197	8.5643e-30	4.9333e-29
K427_26645	pepQ	proline dipeptidase	532.62	227.661	1.2262	6.8613e-28	3.7735e-27
K427_26740	dnaT	primosomal protein DnaI	19.1276	44.3971	-1.2148	0.000993	0.0018683
K427_26810	yjiY	carbon starvation protein A	373.692	101.911	1.8745	1.371e-36	8.9348e-36
K427_26845	hsdM	DNA methyltransferase	22.7844	5.80189	1.9735	0.0012347	0.0022825
K427_26855	--	type I restriction endonuclease	176.509	76.4336	1.2075	4.8895e-10	1.5141e-09
K427_26910	yjiN	membrane protein	10.1264	89.8031	-3.1486	1.1837e-17	4.9866e-17
K427_26915	yjiM	hypothetical protein	75.1041	19.5498	1.9417	6.5611e-09	1.9216e-08
K427_26965	iadA	isoaspartyl dipeptidase	111.25	27.8743	1.9968	6.2177e-13	2.2162e-12
K427_26995	uxuR	transcriptional regulator	48.663	117.173	-1.2677	3.2829e-08	9.2044e-08
K427_27005	uxuB	D-mannonate oxidoreductase	216.592	92.3257	1.2302	2.5878e-12	8.9736e-12
K427_27125	emrA	multidrug transporter	152.74	60.1631	1.3441	2.8114e-10	8.8181e-10
K427_27165	proX	glycine/betaine ABC transporter substrate-binding protein	63.7119	14.5047	2.135	1.2702e-08	3.6626e-08
K427_27190	nrdE	ribonucleoside-diphosphate reductase	3.65675	24.7211	-2.7571	2.5356e-05	5.7658e-05
K427_27220	ygaM	hypothetical protein	36.2862	336.005	-3.211	1.5217e-62	1.3958e-61
K427_27230	alaE	membrane protein	28.9727	77.1903	-1.4137	1.1455e-06	2.9127e-06
K427_27265	ygaU	peptidoglycan-binding protein	148.52	851.49	-2.5193	9.1331e-123	1.3294e-121
K427_27270	csiR	transcriptional regulator	19.1276	160.687	-3.0705	1.1187e-29	6.4135e-29
K427_27275	gabP	gamma-aminobutyrate transporter	27.5663	366.906	-3.7344	1.9799e-76	2.1109e-75
K427_27280	gabT	4-aminobutyrate aminotransferase	89.3092	1181.95	-3.7262	1.6766e-241	4.7389e-240
K427_27285	gabD	succinate-semialdehyde dehydrogenase	114.485	1015.46	-3.1489	4.8658e-182	9.9395e-181
K427_27290	lhgO	hydroxyglutarate oxidase	26.7224	264.995	-3.3098	5.8247e-51	4.6884e-50
K427_27295	csiD	carbon starvation induced protein	71.1661	465.665	-2.71	2.2609e-73	2.3792e-72
K427_27375	yfjD	hypothetical protein	33.3327	11.4776	1.5381	0.0010748	0.0020067
K427_27390	rpsP	30S ribosomal protein S16	135.581	47.9286	1.5002	9.6635e-11	3.1237e-10
K427_27395	rimM	16S rRNA-processing protein RimM	429.528	145.678	1.56	1.7898e-32	1.085e-31
K427_27400	trmD	tRNA (guanine-N1)-methyltransferase	665.389	246.58	1.4321	1.4861e-43	1.0656e-42
K427_27405	rplS	50S ribosomal protein L19	367.926	165.606	1.1517	5.5182e-18	2.3574e-17
K427_27415	yfiN	diguanylate cyclase	7.31351	45.28	-2.6302	2.6769e-08	7.593e-08
K427_27420	yfiR	hypothetical protein	3.7974	38.8474	-3.3547	7.4255e-09	2.1695e-08
K427_27425	yfiL	lipoprotein	9.56382	88.9202	-3.2169	8.482e-18	3.5983e-17
K427_27440	pheA	chorismate mutase	314.059	653.848	-1.0579	7.4992e-30	4.3404e-29
K427_27520	ybgS	hypothetical protein	52.1791	1319.43	-4.6603	1.5493e-303	6.174e-302
K427_27585	modA	molybdate transporter	66.3841	155.264	-1.2258	5.6447e-10	1.7413e-09
K427_27590	modB	molybdate ABC transporter permease	10.9703	30.7752	-1.4882	0.0014288	0.0026174
K427_27650	ybhC	acyl-CoA thioesterase	119.407	39.4781	1.5968	1.9503e-10	6.2054e-10
K427_27660	ybhB	kinase inhibitor	70.7441	156.777	-1.148	3.1515e-09	9.3881e-09
K427_27665	bioA	adenosylmethionine-8-amino-7-oxononanoate aminotransferase	7.5948	23.9643	-1.6578	0.0023836	0.0042385
K427_27720	moaA	molybdenum cofactor biosynthesis protein A	152.037	66.7217	1.1882	1.2007e-08	3.4746e-08
K427_27725	moaB	molybdopterin biosynthesis protein B	244.018	33.0455	2.8845	3.9103e-40	2.7081e-39
K427_27730	moaC	molybdenum cofactor biosynthesis protein MoaC	98.1698	11.2254	3.1285	2.1024e-18	9.1096e-18
K427_27740	moaE	molybdopterin guanine dinucleotide biosynthesis protein MoaE	62.1648	11.7299	2.4059	1.4243e-09	4.3388e-09
K427_27745	ybhL	hypothetical protein	331.78	887.311	-1.4192	1.7385e-61	1.5595e-60
K427_27760	ybhN	membrane protein	2.5316	18.7931	-2.8921	0.00016928	0.00035109
K427_27765	clsB	cardiolipin synthase 2	9.70446	69.1181	-2.8323	9.4188e-13	3.323e-12
K427_27770	ybhP	hypothetical protein	7.03222	93.0825	-3.7265	1.2543e-20	5.7636e-20
K427_27775	ybhQ	membrane protein	232.063	666.587	-1.5223	1.9594e-51	1.593e-50
K427_27875	yncE	hypothetical protein	51.6165	210.886	-2.0306	6.0664e-25	3.1309e-24
K427_27930	patD	gamma-aminobutyraldehyde dehydrogenase	25.0347	90.3077	-1.8509	2.0745e-10	6.5747e-10
K427_27935	ydcV	spermidine/putrescine ABC transporter permease	3.93804	64.3253	-4.0298	2.0577e-15	7.9398e-15
K427_27940	ydcU	spermidine/putrescine ABC transporter permease	8.57931	82.8661	-3.2718	6.5047e-17	2.6709e-16
K427_27945	ydcT	polyamine ABC transporter ATP-binding protein	15.0489	114.776	-2.9311	8.3385e-21	3.8462e-20
K427_27950	ydcS	spermidine/putrescine ABC transporter substrate-binding protein	78.3389	732.551	-3.2251	1.2505e-134	1.9612e-133
K427_27970	ydcP	protease	40.6462	10.9731	1.8891	2.8051e-05	6.3609e-05
K427_27985	ydcL	hypothetical protein	220.108	655.235	-1.5738	5.8349e-53	4.8244e-52
K427_28005	ydcK	acetyltransferase	11.5328	103.047	-3.1595	4.4075e-20	1.9989e-19
K427_28025	opgD	glucan biosynthesis protein D	215.186	72.7759	1.5641	3.9531e-17	1.6398e-16
K427_28035	ydcJ	hypothetical protein	31.645	162.831	-2.3633	2.8648e-23	1.4183e-22
K427_28070	cybB	cytochrome b561	104.358	50.4512	1.0486	2.0927e-05	4.7945e-05
K427_28080	gapA	glyceraldehyde-3-phosphate dehydrogenase	70.4628	816.553	-3.5346	2.9653e-161	5.3793e-160
K427_28090	ydcF	hypothetical protein	90.7156	198.778	-1.1317	4.2151e-11	1.3922e-10
K427_28115	azoR	FMN-dependent NADH-azoreductase	38.5366	13.2434	1.5409	0.00042981	0.0008515
K427_28435	--	hypothetical protein	178.618	548.152	-1.6177	2.7468e-46	2.0672e-45
K427_28560	yrdD	hypothetical protein	97.8885	221.733	-1.1796	6.2858e-13	2.2372e-12
K427_28575	def	peptide deformylase	370.035	1078.14	-1.5428	1.2552e-83	1.4461e-82
K427_28580	fmt	methionyl-tRNA formyltransferase	137.831	354.924	-1.3646	2.8795e-24	1.4674e-23
K427_28615	rplQ	50S ribosomal protein L17	673.827	279.247	1.2708	8.2137e-37	5.3673e-36
K427_28620	rpoA	DNA-directed RNA polymerase subunit alpha	1829.08	808.607	1.1776	7.6846e-86	9.0242e-85
K427_28625	rpsD	30S ribosomal protein S4	806.314	372.204	1.1152	1.2542e-35	8.0229e-35
K427_28660	rplO	50S ribosomal protein L15	862.572	271.554	1.6674	7.7867e-70	7.9197e-69
K427_28670	rpsE	30S ribosomal protein S5	751.322	225.517	1.7362	1.2603e-64	1.2014e-63
K427_28675	rplR	50S ribosomal protein L18	266.802	75.2984	1.8251	1.0872e-25	5.7576e-25
K427_28680	rplF	50S ribosomal protein L6	807.017	219.084	1.8811	2.5024e-77	2.6915e-76
K427_28685	rpsH	30S ribosomal protein S8	492.537	130.669	1.9143	5.0942e-49	3.9818e-48
K427_28690	rpsN	30S ribosomal protein S14	455.266	120.2	1.9213	1.1649e-45	8.66e-45
K427_28695	rplE	50S ribosomal protein L5	1029.94	275.337	1.9033	9.7549e-100	1.2546e-98
K427_28700	rplX	50S ribosomal protein L24	265.396	67.4785	1.9756	2.5845e-28	1.4377e-27
K427_28705	rplN	50S ribosomal protein L14	684.657	186.543	1.8759	1.2332e-65	1.1849e-64
K427_28710	rpsQ	30S ribosomal protein S17	399.149	95.4789	2.0637	4.0691e-44	2.9615e-43
K427_28715	rpmC	50S ribosomal protein L29	25.4566	6.05414	2.072	0.00041973	0.00083221
K427_28720	rplP	50S ribosomal protein L16	865.104	194.489	2.1532	1.0835e-98	1.3862e-97
K427_28725	rpsC	30S ribosomal protein S3	1763.26	322.131	2.4525	2.4863e-233	6.947e-232
K427_28730	rplV	50S ribosomal protein L22	295.072	43.388	2.7657	3.5505e-46	2.6556e-45
K427_28735	rpsS	30S ribosomal protein S19	176.649	21.694	3.0255	7.0387e-31	4.1329e-30
K427_28740	rplB	50S ribosomal protein L2	1762.56	209.625	3.0718	4.7687e-296	1.84e-294
K427_28745	rplW	50S ribosomal protein L23	181.713	15.766	3.5268	4.4519e-36	2.8858e-35
K427_28750	rplD	50S ribosomal protein L4	671.858	63.4424	3.4046	6.5042e-125	9.8203e-124
K427_28755	rplC	50S ribosomal protein L3	1558.2	157.66	3.305	6.4329e-280	2.1421e-278
K427_28760	rpsJ	30S ribosomal protein S10	1071.15	103.047	3.3778	1.1509e-196	2.4979e-195
K427_28845	bfr	bacterioferritin	92.8253	856.661	-3.2061	2.6041e-156	4.6206e-155
K427_28905	rplK	50S ribosomal protein L11	507.304	103.425	2.2943	2.3622e-63	2.2085e-62
K427_28910	rplA	50S ribosomal protein L1	1560.59	294.635	2.4051	4.5855e-202	1.0321e-200
K427_28915	rplJ	50S ribosomal protein L10	1172.27	283.41	2.0483	8.0743e-125	1.2116e-123
K427_28920	rplL	50S ribosomal protein L7/L12	1046.96	434.763	1.2679	4.9309e-56	4.2655e-55
K427_28930	rpoB	DNA-directed RNA polymerase subunit beta	3599.51	1376.18	1.3871	8.6912e-217	2.1127e-215
K427_28945	thiH	thiamine biosynthesis protein ThiH	349.501	761.687	-1.1239	9.1589e-38	6.05e-37
K427_28950	thiG	thiazole synthase	252.457	556.729	-1.1409	1.1171e-28	6.257e-28
K427_28960	thiF	molybdopterin biosynthesis protein MoeB	221.656	498.332	-1.1688	9.1792e-27	4.9475e-26
K427_28965	thiE	thiamine-phosphate pyrophosphorylase	204.778	467.935	-1.1922	5.7769e-26	3.0728e-25
K427_28970	thiC	thiamine biosynthesis protein ThiC	995.762	2004.8	-1.0096	8.2404e-82	9.3168e-81
K427_29000	hupA	DNA-binding protein	2537.93	725.614	1.8064	3.8855e-226	1.0266e-224
K427_29020	zraS	sensor protein ZraS	235.861	532.134	-1.1739	1.1996e-28	6.7034e-28
K427_29025	zraR	transcriptional regulator	126.017	61.8027	1.0279	4.286e-06	1.0415e-05
K427_29030	purD	phosphoribosylamine--glycine ligase	47.5378	19.8021	1.2634	0.0008083	0.0015392
K427_29115	yjhF	gluconate permease	21.6592	2.64869	3.0316	5.13e-05	0.00011245
K427_29120	yjhG	dehydratase	236.283	71.7668	1.7191	3.3639e-21	1.5725e-20
K427_29125	yjhH	2-keto-3-deoxy-galactonate aldolase	40.5056	10.2164	1.9872	1.5057e-05	3.5058e-05
K427_29155	sgcQ	SgcQ protein	13.5019	55.6225	-2.0425	1.0568e-07	2.8766e-07
K427_29160	sgcC	permase	26.7224	86.0193	-1.6866	5.7289e-09	1.6839e-08
K427_29170	sgcX	aminopeptidase	28.4102	64.5775	-1.1846	9.8223e-05	0.00020889
K427_29240	nanM	N-acetylneuraminic acid mutarotase	19.9715	47.298	-1.2438	0.00053977	0.0010539
K427_29300	fdnI	formate dehydrogenase	271.022	47.1719	2.5224	1.3371e-38	9.0036e-38
K427_29305	fdnH	formate dehydrogenase	223.625	5.80189	5.2684	1.3744e-53	1.1442e-52
K427_29310	fdnG	formate dehydrogenase	943.864	9.71186	6.6027	3.8285e-218	9.4965e-217
K427_29315	fdnG	sulfate ABC transporter substrate-binding protein	207.31	2.14418	6.5952	2.0725e-49	1.6251e-48
K427_29355	narU	nitrate/nitrite transporter NarK	38.8178	188.814	-2.2822	1.0194e-25	5.4103e-25
K427_29360	narZ	nitrate reductase	150.63	588.387	-1.9658	6.6695e-64	6.2839e-63
K427_29365	narY	nitrate reductase	46.1314	260.328	-2.4965	2.0119e-38	1.351e-37
K427_29370	narW	nitrate reductase	11.5328	78.1994	-2.7614	6.5476e-14	2.4225e-13
K427_29375	narV	hypothetical protein	16.4554	83.2445	-2.3388	1.6388e-12	5.7319e-12
K427_29400	yddH	hypothetical protein	3.23482	24.3427	-2.9117	1.7507e-05	4.0453e-05
K427_29845	gltA	type II citrate synthase	4828.18	1759.11	1.4566	0	0
K427_29870	sdhC	succinate dehydrogenase	472.706	182.003	1.377	1.1375e-29	6.5059e-29
K427_29875	sdhD	succinate dehydrogenase	37.2708	11.856	1.6524	0.0002653	0.00053921
K427_29880	sdhA	succinate dehydrogenase	2624.56	1051.78	1.3192	1.213e-146	2.062e-145
K427_29885	sdhB	succinate dehydrogenase	2141.45	867.887	1.303	1.1152e-117	1.5761e-116
K427_30075	adhP	ethanol-active dehydrogenase/acetaldehyde-active reductase	64.6964	1956.37	-4.9184	0	0
K427_30080	maeA	NAD-dependent malic enzyme	709.832	269.283	1.3984	1.0022e-44	7.3603e-44
K427_30090	sra	30S ribosomal subunit S22	134.034	1811.58	-3.7566	0	0
K427_30105	osmC	peroxiredoxin OsmC	79.0421	743.272	-3.2332	7.3342e-137	1.1652e-135
K427_30115	dosP	c-di-GMP phosphodiesterase	18.0025	61.6766	-1.7765	3.2201e-07	8.5641e-07
K427_30120	dosC	diguanylate cyclase	2.39095	23.9643	-3.3252	6.0685e-06	1.4505e-05
K427_30130	gadC	antiporter	703.784	15570.1	-4.4675	0	0
K427_30310	tufB	elongation factor Tu	1319.38	207.985	2.6653	3.019e-192	6.4376e-191
Wild-type E. coli was exposed to 1.20 mg/L s-AgNPs in LB medium for 5 h, and untreated wild-type E. coli was used as a biotic control. The differentially expressed genes in E. coli + s-AgNPs compared with control (wild-type E. coli) were identified by considering both the fold change (log2FC > 1) and the p-value (< 0.005).
