# Supplementary material for: Is sulfidation a true detoxification process for silver nanoparticles?: from the perspective of chronic exposure
Source: Royal Society of Chemistry journal article supplement (doi:10.1039/c9en00989b), 2019-01-01
Supplement: c9en00989b3.xlsx [file c9en00989b3.xlsx]

## Sheet: Sheet1
Electronic supplementary information - Part Ⅲ
Genetic mutations at target sites annotated for adapted Es-AgNP based on whole-genome sequencing analysis.
Gene	Ref	Es-AgNP1	Es-AgNP2	Site	Annotation	Gene classification
purl	T	A	A	152750	R1263R	global regulator genes
purl	C	T	T	152801	A1246A	global regulator genes
purl	G	A	A	152813	N1242N	global regulator genes
purl	T	A	A	152819	S1240S	global regulator genes
purl	G	A	A	152927	R1204R	global regulator genes
purl	A	C	C	152936	V1201V	global regulator genes
purl	T	C	C	153092	P1149P	global regulator genes
purl	T	C	C	153350	A1063A	global regulator genes
purl	G	A	A	153392	G1049G	global regulator genes
purl	A	C	C	153488	L1017L	global regulator genes
purl	G	A	A	153557	R994R	global regulator genes
purl	A	C	C	153575	T988T	global regulator genes
purl	C	T	T	153774	S922N	global regulator genes
purl	T	C	C	153923	A872A	global regulator genes
purl	A	G	G	153944	G865G	global regulator genes
purl	A	G	G	154256	G761G	global regulator genes
purl	A	C	C	154286	A751A	global regulator genes
purl	A	G	G	154337	I734I	global regulator genes
purl	A	C	C	154526	G671G	global regulator genes
purl	C	T	T	154547	V664V	global regulator genes
purl	A	G	G	154700	T613T	global regulator genes
purl	G	A	A	154721	L606L	global regulator genes
purl	C	T	T	154937	E534E	global regulator genes
purl	G	A	A	155174	S455S	global regulator genes
purl	A	G	G	155393	R382R	global regulator genes
purl	A	G	G	155452	L363L	global regulator genes
purl	G	A	A	155459	V360V	global regulator genes
purl	G	A	A	155540	V333V	global regulator genes
purl	C	T	T	155570	G323G	global regulator genes
purl	T	C	C	155642	P299P	global regulator genes
purl	T	A	A	155654	T295T	global regulator genes
purl	A	G	G	155732	G269G	global regulator genes
purl	G	A	A	155939	N200N	global regulator genes
purl	T	C	C	155952	K196R	global regulator genes
purl	A	G	G	155971	L190L	global regulator genes
purl	A	G	G	156248	N97N	global regulator genes
purl	G	A	A	156257	I94I	global regulator genes
purl	T	G	G	156444	N32T	global regulator genes
purl	G	A	A	156453	P29L	global regulator genes
rpoB	T	C	C	5072	I219I	global regulator genes
rpoB	C	A	A	5248	T207T	global regulator genes
rpoB	C	T	T	5336	L237L	global regulator genes
rpoB	C	T	T	5488	V287V	global regulator genes
rpoB	T	C	C	5926	I433I	global regulator genes
rpoB	C	T	T	5953	V442V	global regulator genes
rpoB	C	T	T	5992	S455S	global regulator genes
rpoB	C	G	G	6220	S531S	global regulator genes
rpoB	T	C	C	6235	G536G	global regulator genes
rpoB	T	C	C	6355	R67R	global regulator genes
rpoB	A	G	G	6358	V577V	global regulator genes
rpoB	G	A	A	6364	A579A	global regulator genes
rpoB	C	T	T	6442	Y605Y	global regulator genes
rpoB	T	C	C	6568	R647R	global regulator genes
rpoB	C	T	T	6709	R694R	global regulator genes
rpoB	A	G	G	6892	K755K	global regulator genes
rpoB	T	C	C	6964	R779R	global regulator genes
rpoB	C	T	T	6997	D790D	global regulator genes
rpoB	C	T	T	7123	H832H	global regulator genes
rpoB	C	T	T	7153	D842D	global regulator genes
rpoB	G	T	T	7210	A861A	global regulator genes
rpoB	A	G	G	7258	V877V	global regulator genes
rpoB	C	T	T	7306	T893T	global regulator genes
rpoB	C	T	T	7417	D930D	global regulator genes
rpoB	G	T	T	7903	T1092T	global regulator genes
rpoS	G	A	A	601227	V273V	global regulator genes
rpoS	G	A	A	601398	E330E	global regulator genes
rpoS	T	G	G	601399	X331E	global regulator genes
marR	G	A	A	23886	S3N	global regulator genes
marC	A	C	C	23104	G188G	global regulator genes
marC	C	T	T	23422	L82L	global regulator genes
marC	A	G	G	23425	G81G	global regulator genes
marC	T	C	C	23561	N36S	global regulator genes
marC	T	C	C	23602	L22L	global regulator genes
marA	T	C	C	24498	G55G	global regulator genes
marA	A	G	G	24576	A81A	global regulator genes
sxy	C	T	T	177095	S111S	global regulator genes
lon	G	A	A	53762	V20V	global regulator genes
lon	T	C	C	53912	T70T	global regulator genes
lon	T	G	G	53985	L95V	global regulator genes
lon	T	C	C	54534	L278L	global regulator genes
lon	C	A	A	55418	G572G	global regulator genes
lexA	C	T	T	45230	D101D	SOS mutagenesis
lexA	C	T	T	45269	R114R	SOS mutagenesis
lexA	A	G	G	45431	L168L	SOS mutagenesis
lexA	A	G	G	45494	E189E	SOS mutagenesis
recA	A	G	G	647565	P58P	SOS mutagenesis
recA	C	T	T	647721	V110V	SOS mutagenesis
recA	T	C	C	647727	I112I	SOS mutagenesis
recA	T	C	C	647784	D131D	SOS mutagenesis
recA	T	C	C	648003	F204F	SOS mutagenesis
recA	C	T	T	648024	T211T	SOS mutagenesis
recA	C	T	T	648066	D225D	SOS mutagenesis
recB	T	C	C	477907	G17G	SOS mutagenesis
recB	A	G	G	477958	A34A	SOS mutagenesis
recB	A	G	G	478210	E118E	SOS mutagenesis
recB	T	C	C	478249	G131G	SOS mutagenesis
recB	A	C	C	478382	T176P	SOS mutagenesis
recB	G	C	C	478402	V182V	SOS mutagenesis
recB	A	G	G	478471	A205A	SOS mutagenesis
recB	G	C	C	478492	P212P	SOS mutagenesis
recB	A	G	G	478547	T231A	SOS mutagenesis
recB	G	C	C	478549	T231T	SOS mutagenesis
recB	C	G	G	478657	D267E	SOS mutagenesis
recB	T	C	C	478693	S279S	SOS mutagenesis
recB	A	G	G	478705	P283P	SOS mutagenesis
recB	C	T	T	478948	S364S	SOS mutagenesis
recB	G	A	A	478963	V369V	SOS mutagenesis
recB	G	A	A	479032	Q392Q	SOS mutagenesis
recB	C	T	T	479038	Y394Y	SOS mutagenesis
recB	G	A	A	479104	K416K	SOS mutagenesis
recB	C	T	T	479170	H438H	SOS mutagenesis
recB	C	T	T	479173	A439A	SOS mutagenesis
recB	T	C	C	479182	T442T	SOS mutagenesis
recB	C	T	T	479188	D444D	SOS mutagenesis
recB	A	T	T	479296	S480S	SOS mutagenesis
recB	G	C	C	479302	G482G	SOS mutagenesis
recB	G	A	A	479326	V490V	SOS mutagenesis
recB	C	T	T	479435	R527C	SOS mutagenesis
recB	T	C	C	479444	L530L	SOS mutagenesis
recB	G	A	A	479449	Q531Q	SOS mutagenesis
recB	T	C	C	479452	A532A	SOS mutagenesis
recB	A	G	G	479503	V549V	SOS mutagenesis
recB	C	T	T	479551	A565A	SOS mutagenesis
recB	T	C	C	479573	L573L	SOS mutagenesis
recB	A	G	G	479671	T605T	SOS mutagenesis
recB	A	C	C	479779	V641V	SOS mutagenesis
recB	A	G	G	479887	T677T	SOS mutagenesis
recB	T	C	C	479933	L693L	SOS mutagenesis
recB	C	A	A	479950	G698G	SOS mutagenesis
recB	T	C	C	480040	R728R	SOS mutagenesis
recB	G	A	A	480121	P755P	SOS mutagenesis
recB	C	T	T	480127	I757I	SOS mutagenesis
recB	T	C	C	480184	A776A	SOS mutagenesis
recB	A	G	G	480203	T783A	SOS mutagenesis
recB	G	A	A	480391	G845G	SOS mutagenesis
recB	C	T	T	480418	R854R	SOS mutagenesis
recB	A	G	G	480436	L860L	SOS mutagenesis
recB	G	A	A	480440	D862N	SOS mutagenesis
recB	C	T	T	480471	T872I	SOS mutagenesis
recB	T	C	C	480626	L924L	SOS mutagenesis
recB	G	A	A	480758	V968I	SOS mutagenesis
recB	A	G	G	480790	E978E	SOS mutagenesis
recB	C	T	T	480796	G980G	SOS mutagenesis
recB	C	T	T	480819	P988L	SOS mutagenesis
recB	A	G	G	480820	P988P	SOS mutagenesis
recB	C	T	T	480829	T991T	SOS mutagenesis
recB	C	T	T	481033	R1059R	SOS mutagenesis
recB	C	T	T	481057	D1067D	SOS mutagenesis
recB	A	G	G	481063	V1069V	SOS mutagenesis
recB	C	T	T	481112	L1086L	SOS mutagenesis
recB	G	A	A	481168	A1104A	SOS mutagenesis
recB	C	T	T	481231	R1125R	SOS mutagenesis
recB	T	C	C	481291	G1145G	SOS mutagenesis
recB	G	A	A	481315	Q1153Q	SOS mutagenesis
recB	T	C	C	481339	N1161N	SOS mutagenesis
recB	C	A	A	481353	A1166D	SOS mutagenesis
recB	G	A	A	481376	G1174S	SOS mutagenesis
recC	A	G	G	471659	V76V	SOS mutagenesis
recC	T	A	A	471965	D178E	SOS mutagenesis
recC	A	C	C	472193	P254P	SOS mutagenesis
recC	A	C	C	472204	E258A	SOS mutagenesis
recC	C	T	T	472715	S428S	SOS mutagenesis
recC	A	C	C	472934	G501G	SOS mutagenesis
recC	G	T	T	473292	A621S	SOS mutagenesis
recC	T	C	C	473306	G625G	SOS mutagenesis
recC	T	C	C	473687	I752I	SOS mutagenesis
recC	C	T	T	473732	L767L	SOS mutagenesis
recC	T	A	A	473779	L783H	SOS mutagenesis
recC	A	G	G	473846	E805E	SOS mutagenesis
recC	A	G	G	473906	P825P	SOS mutagenesis
recC	A	G	G	473972	A847A	SOS mutagenesis
recC	C	T	T	474023	I864I	SOS mutagenesis
recC	C	T	T	474032	T867T	SOS mutagenesis
recC	A	G	G	474482	L1017L	SOS mutagenesis
recC	G	A	A	474497	Q1022Q	SOS mutagenesis
recC	A	G	G	474506	E1025E	SOS mutagenesis
polB	A	G	G	157583	G18G	SOS mutagenesis
polB	T	C	C	157598	F23F	SOS mutagenesis
polB	G	A	A	157742	K71K	SOS mutagenesis
polB	T	C	C	157751	H74H	SOS mutagenesis
polB	C	G	G	157825	A99G	SOS mutagenesis
polB	A	C	C	157954	Q142P	SOS mutagenesis
polB	G	A	A	158317	G263D	SOS mutagenesis
polB	A	G	G	158504	K325K	SOS mutagenesis
polB	C	T	T	158975	R482R	SOS mutagenesis
polB	G	C	C	159125	T532T	SOS mutagenesis
polB	A	G	G	159419	V630V	SOS mutagenesis
polB	G	T	T	159485	L652L	SOS mutagenesis
polB	T	C	C	159494	R655R	SOS mutagenesis
polB	A	G	G	159571	Q681R	SOS mutagenesis
dinB	A	C	C	150445	P341P	SOS mutagenesis
dinB	A	G	G	150499	R323R	SOS mutagenesis
dinB	C	A	A	150540	A310S	SOS mutagenesis
dinB	A	G	G	150571	T299T	SOS mutagenesis
dinB	T	C	C	150964	E168E	SOS mutagenesis
dinB	C	A	A	150973	T165T	SOS mutagenesis
dinB	A	G	G	151012	A152A	SOS mutagenesis
dinB	A	G	G	151015	I151I	SOS mutagenesis
dinB	C	T	T	151348	V40V	SOS mutagenesis
dinB	A	G	G	151408	D20D	SOS mutagenesis
umuC	G	A	A	194925	C113Y	SOS mutagenesis
umuC	C	T	T	194957	R124C	SOS mutagenesis
umuC	T	C	C	195038	Y151H	SOS mutagenesis
mutS	C	T	T	610383	E844E	DNA repair
mutS	A	G	G	610406	L837L	DNA repair
mutS	G	A	A	610430	L829L	DNA repair
mutS	C	A	A	610584	A777A	DNA repair
mutS	G	C	C	610971	G648G	DNA repair
mutS	T	C	C	610983	K644K	DNA repair
mutS	G	C	C	611061	G618G	DNA repair
mutS	A	G	G	611079	I612I	DNA repair
mutS	T	C	C	611397	L506L	DNA repair
mutS	T	C	C	611403	P504P	DNA repair
mutS	C	G	G	611880	V345V	DNA repair
mutS	A	G	G	611903	L338L	DNA repair
mutS	G	A	A	611907	A336A	DNA repair
mutS	A	G	G	612003	S304S	DNA repair
mutS	A	G	G	612006	G303G	DNA repair
mutS	C	T	T	612432	A161A	DNA repair
mutS	C	A	A	612489	G142G	DNA repair
mutS	A	G	G	612522	N131N	DNA repair
mutS	T	C	C	612540	L125L	DNA repair
mutS	T	C	C	612546	A123A	DNA repair
mutS	C	T	T	612774	A47A	DNA repair
mutY	T	C	C	342992	Q286Q	DNA repair
mutY	G	A	A	343099	P251S	DNA repair
mutY	A	G	G	343148	Y234Y	DNA repair
mutY	G	A	A	343253	C199C	DNA repair
mutY	G	A	A	343385	P155P	DNA repair
mutY	G	C	C	343421	R143R	DNA repair
mutY	T	C	C	343501	I117V	DNA repair
mutY	T	C	C	343583	L89L	DNA repair
mutY	G	A	A	343586	N88N	DNA repair
mutM	A	G	G	134201	Q232Q	DNA repair
mutM	C	T	T	134228	G241G	DNA repair
mutT	T	A	A	111396	R90W	DNA repair
mutT	A	G	G	111610	I18I	DNA repair
uvrA	T	C	C	72175	V234V	DNA repair
uvrA	A	G	G	72297	L194L	DNA repair
uvrA	T	C	C	72523	P118P	DNA repair
uvrB	A	T	T	32001	P59P	DNA repair
uvrB	C	T	T	32148	F108F	DNA repair
uvrB	C	T	T	32340	I172I	DNA repair
uvrB	T	C	C	32367	Y181Y	DNA repair
uvrB	T	C	C	32394	R190R	DNA repair
uvrB	C	T	T	32415	G197G	DNA repair
uvrB	T	A	A	32424	I200I	DNA repair
uvrB	G	A	A	32469	E215E	DNA repair
uvrB	A	G	G	32580	P252P	DNA repair
uvrB	C	A	A	32595	V257V	DNA repair
uvrB	G	A	A	32607	E261E	DNA repair
uvrB	C	T	T	32662	L280L	DNA repair
uvrB	G	T	T	32667	L281L	DNA repair
uvrB	A	G	G	32724	L300L	DNA repair
uvrB	G	C	C	32736	S304S	DNA repair
uvrB	T	C	C	32817	A331A	DNA repair
uvrB	T	C	C	32871	G349G	DNA repair
uvrB	A	T	T	32904	T360T	DNA repair
uvrB	C	T	T	33483	Y553Y	DNA repair
uvrB	G	A	A	33681	E619E	DNA repair
yggE	T	C	C	383442	N174N	Oxidative stress
yggE	A	C	C	383449	N177H	Oxidative stress
yggE	C	T	T	383454	R178R	Oxidative stress
yggE	G	A	A	383604	V228V	Oxidative stress
yggE	G	A	A	383605	V229I	Oxidative stress
yggE	C	A	A	383634	P238P	Oxidative stress
yggX	A	G	G	342651	V40A	Oxidative stress
yggX	A	G	G	342665	S35S	Oxidative stress
soxS	T	C	C	130235	M2T	Oxidative stress
soxS	A	G	G	130251	T7T	Oxidative stress
soxS	T	A	A	130392	P54P	Oxidative stress
oxyR	T	C	C	10812	L64L	Oxidative stress
sodA	C	T	T	78156	A203A	Oxidative stress
sodA	G	A	A	78207	I186I	Oxidative stress
sodA	A	G	G	78289	V159A	Oxidative stress
sodA	A	G	G	78300	A155A	Oxidative stress
sodA	G	A	A	78474	G97G	Oxidative stress
sodA	A	G	G	78516	S83S	Oxidative stress
sodA	C	T	T	78576	Q63Q	Oxidative stress
sodA	G	A	A	78615	A50A	Oxidative stress
sodA	A	G	G	78618	F49F	Oxidative stress
sodA	G	A	A	78657	V36V	Oxidative stress
sodA	A	G	G	78663	T34T	Oxidative stress
sodA	T	C	C	78665	T34A	Oxidative stress
sodC	G	A	A	113911	S37L	Oxidative stress
katE	C	A	A	197149	A133A	Oxidative stress
katE	G	A	A	197216	A156T	Oxidative stress
katE	A	G	G	198121	P457P	Oxidative stress
katE	C	A	A	198223	G491G	Oxidative stress
katE	A	G	G	198427	A559A	Oxidative stress
katE	G	T	T	198524	A592S	Oxidative stress
katE	A	G	G	198616	A622A	Oxidative stress
katE	A	G	G	198779	N677D	Oxidative stress
katG	A	G	G	36335	V696V	Oxidative stress
katG	A	G	G	36536	G629G	Oxidative stress
katG	A	G	G	36613	L604L	Oxidative stress
katG	G	T	T	36626	A599A	Oxidative stress
katG	A	G	G	36643	L594L	Oxidative stress
katG	G	A	A	36677	Y582Y	Oxidative stress
katG	T	C	C	36722	E567E	Oxidative stress
katG	G	A	A	36758	G555G	Oxidative stress
katG	T	C	C	36793	T544A	Oxidative stress
katG	G	A	A	37385	G346G	Oxidative stress
katG	G	A	A	37426	L333L	Oxidative stress
katG	T	A	A	37562	A287A	Oxidative stress
katG	G	A	A	37598	A275A	Oxidative stress
katG	T	C	C	37700	A241A	Oxidative stress
katG	A	C	C	37727	P232P	Oxidative stress
katG	C	T	T	38363	Q20Q	Oxidative stress
cusA	G	A	A	85898	I681I	Copper/silver export system
cusA	A	T	T	86087	S618S	Copper/silver export system
cusA	A	C	C	86141	P600P	Copper/silver export system
cusA	A	G	G	86180	S587S	Copper/silver export system
cusA	A	G	G	86339	H534H	Copper/silver export system
cusA	C	T	T	86468	L491L	Copper/silver export system
cusA	T	A	A	86525	G472G	Copper/silver export system
cusA	C	T	T	86528	E471E	Copper/silver export system
cusA	C	T	T	87806	V45V	Copper/silver export system
cusA	A	G	G	87851	T30T	Copper/silver export system
cusB	T	C	C	88278	I300V	Copper/silver export system
cusB	A	G	G	88290	L296L	Copper/silver export system
cusB	C	T	T	88291	Q295Q	Copper/silver export system
cusB	G	A	A	88585	R197R	Copper/silver export system
cusB	A	C	C	88897	G93G	Copper/silver export system
cusC	G	A	A	89895	A345A	Copper/silver export system
cusC	G	A	A	89952	N326N	Copper/silver export system
cusC	T	C	C	90216	A238A	Copper/silver export system
cusC	C	T	T	90399	Q177Q	Copper/silver export system
cusC	T	C	C	90420	A170A	Copper/silver export system
cusC	A	G	G	90437	L165L	Copper/silver export system
cusC	C	T	T	90613	G106D	Copper/silver export system
cusC	G	A	A	90783	Y49Y	Copper/silver export system
cusS	G	A	A	91770	K4K	Copper/silver export system
cusS	C	T	T	91800	T14T	Copper/silver export system
cusS	G	A	A	91914	K52K	Copper/silver export system
cusS	C	T	T	92025	S89S	Copper/silver export system
cusS	A	G	G	92032	N92D	Copper/silver export system
cusS	A	C	C	92064	P102P	Copper/silver export system
cusS	C	G	G	92123	A122G	Copper/silver export system
cusS	T	C	C	92124	A122A	Copper/silver export system
cusS	G	A	A	92151	P131P	Copper/silver export system
cusS	C	T	T	92904	N382N	Copper/silver export system
cusS	G	T	T	92922	L388L	Copper/silver export system
cusS	T	C	C	92952	V398V	Copper/silver export system
